# Supplementary material for: Single-cell RNA-seq combined with bulk RNA-seq analysis identifies necroptosis-related genes as therapeutic targets for periodontitis
Source: Research Square preprint supplement (doi:10.21203/rs.3.rs-6576613/v1), 2025-05-15
Supplement: Supplementary file 1 [file 32db972d12fa038fe5be42c2.docx]

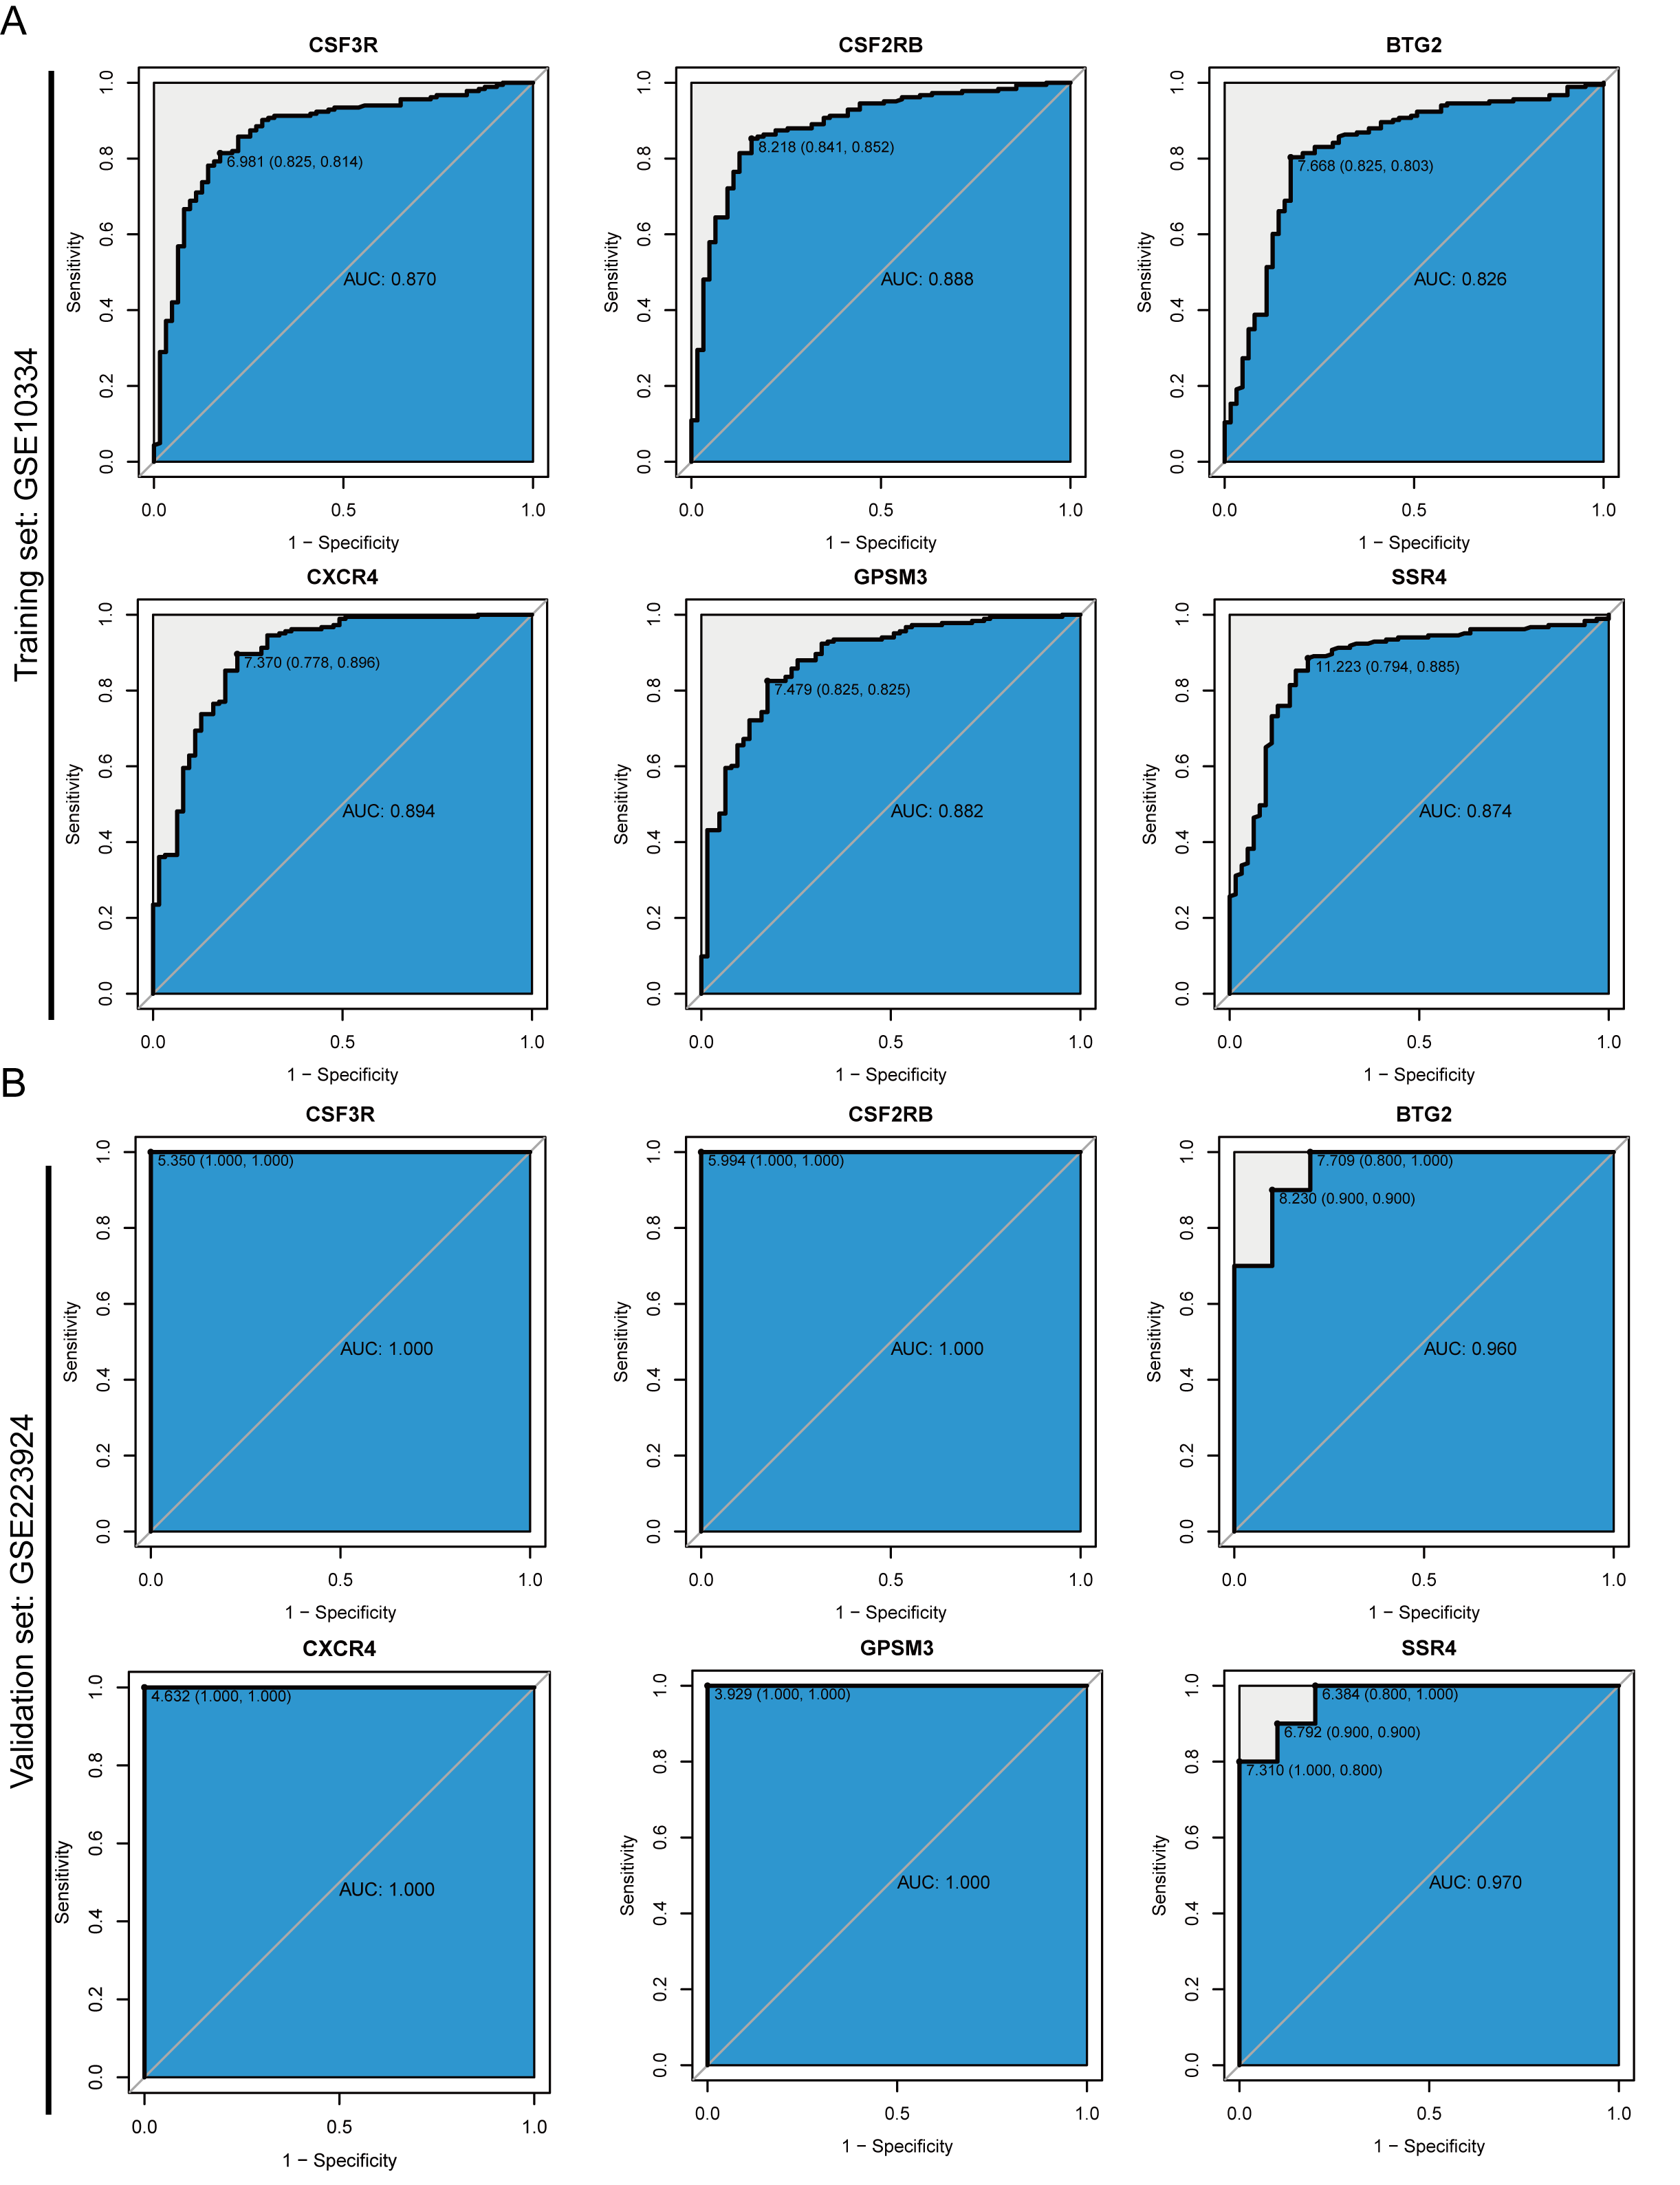


**Fig S1. ROC curves of the six hub genes in the training set and independent validation set.** **A** ROC curves of the six hub genes in the training set GSE10334. **B** ROC curves of the six hub genes in the independent validation set GSE223924.
