# Supplementary material for: Single-cell RNA-seq combined with bulk RNA-seq analysis identifies necroptosis-related genes as therapeutic targets for periodontitis
Source: Research Square preprint supplement (doi:10.21203/rs.3.rs-6576613/v1), 2025-05-15
Supplement: Supplementary file 2 [file 376ff26574abc8c496d2219d.xlsx]

## Sheet: Table S1
Table S1. Primers for amplification of indicated genes.
Gene	Forward primer (5'-3')	Reverse primer (5'-3')
CSF3R	GAGCTGAGAACTACCGAACGG	GGCCTGAGGGTCTCCAAGA
CSF2RB	GGCCAATACATCGTCTCTGTT	GTCTCGGTCTTGCTGTCCTTC
BTG2	CATCATCAGCAGGGTGGC	CCCAATGCGGTAGGACAC
CXCR4	CTGCTGACTATTCCCGACTT	TGAAACTGGAACACAACCAC
GPSM3	AGGAGTTTTTCCCAGTCTCAGT	TTCTCTTCCCACCCAAACAGC
SSR4	GAGAAGGAGGGAAGTGCGAC	AACGTCGGCATAAAGAGCCA

## Sheet: Table S2
Table S2. Total necroptosis-related genes obtained from the GeneCards database with a relevance score > 1.
Gene Symbol	Description	Category	Gifts	GC Id	Relevance score	GeneCards Link
RIPK1	Receptor Interacting Serine/Threonine Kinase 1	Protein Coding	56	GC06P003333	20.1213	https://www.genecards.org/cgi-bin/carddisp.pl?gene=RIPK1
RIPK3	Receptor Interacting Serine/Threonine Kinase 3	Protein Coding	50	GC14M024336	17.307	https://www.genecards.org/cgi-bin/carddisp.pl?gene=RIPK3
MLKL	Mixed Lineage Kinase Domain Like Pseudokinase	Protein Coding	49	GC16M074672	16.8215	https://www.genecards.org/cgi-bin/carddisp.pl?gene=MLKL
ZBP1	Z-DNA Binding Protein 1	Protein Coding	47	GC20M057603	10.8572	https://www.genecards.org/cgi-bin/carddisp.pl?gene=ZBP1
CASP8	Caspase 8	Protein Coding	59	GC02P201233	7.48072	https://www.genecards.org/cgi-bin/carddisp.pl?gene=CASP8
TNF	Tumor Necrosis Factor	Protein Coding	59	GC06P092154	4.94142	https://www.genecards.org/cgi-bin/carddisp.pl?gene=TNF
CYLD	CYLD Lysine 63 Deubiquitinase	Protein Coding	55	GC16P050742	4.04621	https://www.genecards.org/cgi-bin/carddisp.pl?gene=CYLD
ITPK1	Inositol-Tetrakisphosphate 1-Kinase	Protein Coding	45	GC14M092936	3.61772	https://www.genecards.org/cgi-bin/carddisp.pl?gene=ITPK1
IPMK	Inositol Polyphosphate Multikinase	Protein Coding	43	GC10M058191	3.61772	https://www.genecards.org/cgi-bin/carddisp.pl?gene=IPMK
MAP3K7	Mitogen-Activated Protein Kinase Kinase Kinase 7	Protein Coding	57	GC06M090513	3.1912	https://www.genecards.org/cgi-bin/carddisp.pl?gene=MAP3K7
CASP6	Caspase 6	Protein Coding	55	GC04M109688	3.08368	https://www.genecards.org/cgi-bin/carddisp.pl?gene=CASP6
TRPM7	Transient Receptor Potential Cation Channel Subfamily M Member 7	Protein Coding	50	GC15M050552	3.03861	https://www.genecards.org/cgi-bin/carddisp.pl?gene=TRPM7
FADD	Fas Associated Via Death Domain	Protein Coding	52	GC11P070203	2.74959	https://www.genecards.org/cgi-bin/carddisp.pl?gene=FADD
PELI1	Pellino E3 Ubiquitin Protein Ligase 1	Protein Coding	48	GC02M064092	2.68334	https://www.genecards.org/cgi-bin/carddisp.pl?gene=PELI1
PGLYRP1	Peptidoglycan Recognition Protein 1	Protein Coding	48	GC19M070755	2.6135	https://www.genecards.org/cgi-bin/carddisp.pl?gene=PGLYRP1
SPATA2	Spermatogenesis Associated 2	Protein Coding	40	GC20M049903	2.51504	https://www.genecards.org/cgi-bin/carddisp.pl?gene=SPATA2
SIRT3	Sirtuin 3	Protein Coding	54	GC11M000215	2.24839	https://www.genecards.org/cgi-bin/carddisp.pl?gene=SIRT3
TNIP1	TNFAIP3 Interacting Protein 1	Protein Coding	46	GC05M151029	2.22335	https://www.genecards.org/cgi-bin/carddisp.pl?gene=TNIP1
HMGB1	High Mobility Group Box 1	Protein Coding	54	GC13M030456	2.15338	https://www.genecards.org/cgi-bin/carddisp.pl?gene=HMGB1
TP53	Tumor Protein P53	Protein Coding	60	GC17M007661	2.02303	https://www.genecards.org/cgi-bin/carddisp.pl?gene=TP53
TNFRSF1A	TNF Receptor Superfamily Member 1A	Protein Coding	57	GC12M006328	2.02006	https://www.genecards.org/cgi-bin/carddisp.pl?gene=TNFRSF1A
BIRC2	Baculoviral IAP Repeat Containing 2	Protein Coding	53	GC11P102347	1.97134	https://www.genecards.org/cgi-bin/carddisp.pl?gene=BIRC2
MEFV	MEFV Innate Immunity Regulator, Pyrin	Protein Coding	51	GC16M008228	1.94632	https://www.genecards.org/cgi-bin/carddisp.pl?gene=MEFV
AIM2	Absent In Melanoma 2	Protein Coding	48	GC01M159062	1.94632	https://www.genecards.org/cgi-bin/carddisp.pl?gene=AIM2
TNFAIP3	TNF Alpha Induced Protein 3	Protein Coding	55	GC06P137866	1.86209	https://www.genecards.org/cgi-bin/carddisp.pl?gene=TNFAIP3
UCHL1	Ubiquitin C-Terminal Hydrolase L1	Protein Coding	59	GC04P041256	1.84545	https://www.genecards.org/cgi-bin/carddisp.pl?gene=UCHL1
STING1	Stimulator Of Interferon Response CGAMP Interactor 1	Protein Coding	48	GC05M139476	1.81052	https://www.genecards.org/cgi-bin/carddisp.pl?gene=STING1
SERTAD1	SERTA Domain Containing 1	Protein Coding	40	GC19M040421	1.773	https://www.genecards.org/cgi-bin/carddisp.pl?gene=SERTAD1
TRAF2	TNF Receptor Associated Factor 2	Protein Coding	51	GC09P136881	1.76267	https://www.genecards.org/cgi-bin/carddisp.pl?gene=TRAF2
NFKB1	Nuclear Factor Kappa B Subunit 1	Protein Coding	60	GC04P102501	1.75306	https://www.genecards.org/cgi-bin/carddisp.pl?gene=NFKB1
CFLAR	CASP8 And FADD Like Apoptosis Regulator	Protein Coding	51	GC02P201122	1.73165	https://www.genecards.org/cgi-bin/carddisp.pl?gene=CFLAR
CTSB	Cathepsin B	Protein Coding	59	GC08M011842	1.71025	https://www.genecards.org/cgi-bin/carddisp.pl?gene=CTSB
MAPK14	Mitogen-Activated Protein Kinase 14	Protein Coding	58	GC06P092286	1.71025	https://www.genecards.org/cgi-bin/carddisp.pl?gene=MAPK14
FAS	Fas Cell Surface Death Receptor	Protein Coding	57	GC10P094616	1.69884	https://www.genecards.org/cgi-bin/carddisp.pl?gene=FAS
LINC03054	Long Intergenic Non-Protein Coding RNA 3054	RNA Gene	13	GC08P048619	1.64461	https://www.genecards.org/cgi-bin/carddisp.pl?gene=LINC03054
CAMTA1-AS3	CAMTA1 Antisense RNA 3	RNA Gene	2	GC01U907111	1.64461	https://www.genecards.org/cgi-bin/carddisp.pl?gene=CAMTA1-AS3
RAB35-AS1	RAB35 Antisense RNA 1	RNA Gene	2	GC12U903548	1.64461	https://www.genecards.org/cgi-bin/carddisp.pl?gene=RAB35-AS1
SLC39A13-AS1	SLC39A13 Antisense RNA 1	RNA Gene	2	GC11U903807	1.64461	https://www.genecards.org/cgi-bin/carddisp.pl?gene=SLC39A13-AS1
AIFM1	Apoptosis Inducing Factor Mitochondria Associated 1	Protein Coding	56	GC0XM130129	1.62639	https://www.genecards.org/cgi-bin/carddisp.pl?gene=AIFM1
KLHDC10	Kelch Domain Containing 10	Protein Coding	39	GC07P130070	1.5872	https://www.genecards.org/cgi-bin/carddisp.pl?gene=KLHDC10
SFTPA1	Surfactant Protein A1	Protein Coding	51	GC10P095475	1.56364	https://www.genecards.org/cgi-bin/carddisp.pl?gene=SFTPA1
GSK3B	Glycogen Synthase Kinase 3 Beta	Protein Coding	57	GC03M119821	1.53883	https://www.genecards.org/cgi-bin/carddisp.pl?gene=GSK3B
TRADD	TNFRSF1A Associated Via Death Domain	Protein Coding	48	GC16M067154	1.53358	https://www.genecards.org/cgi-bin/carddisp.pl?gene=TRADD
XIAP	X-Linked Inhibitor Of Apoptosis	Protein Coding	59	GC0XP123859	1.49605	https://www.genecards.org/cgi-bin/carddisp.pl?gene=XIAP
ADAR	Adenosine Deaminase RNA Specific	Protein Coding	52	GC01M154599	1.47878	https://www.genecards.org/cgi-bin/carddisp.pl?gene=ADAR
MYC	MYC Proto-Oncogene, BHLH Transcription Factor	Protein Coding	59	GC08P127735	1.47612	https://www.genecards.org/cgi-bin/carddisp.pl?gene=MYC
TNIP3	TNFAIP3 Interacting Protein 3	Protein Coding	43	GC04M121131	1.47612	https://www.genecards.org/cgi-bin/carddisp.pl?gene=TNIP3
TLR4	Toll Like Receptor 4	Protein Coding	58	GC09P117704	1.45525	https://www.genecards.org/cgi-bin/carddisp.pl?gene=TLR4
GJB1	Gap Junction Protein Beta 1	Protein Coding	53	GC0XP071212	1.45525	https://www.genecards.org/cgi-bin/carddisp.pl?gene=GJB1
DNM1L	Dynamin 1 Like	Protein Coding	54	GC12P032679	1.43331	https://www.genecards.org/cgi-bin/carddisp.pl?gene=DNM1L
PTGES3	Prostaglandin E Synthase 3	Protein Coding	51	GC12M057070	1.43331	https://www.genecards.org/cgi-bin/carddisp.pl?gene=PTGES3
UVRAG	UV Radiation Resistance Associated	Protein Coding	48	GC11P075815	1.43331	https://www.genecards.org/cgi-bin/carddisp.pl?gene=UVRAG
MIR324	MicroRNA 324	RNA Gene	23	GC17M007223	1.43331	https://www.genecards.org/cgi-bin/carddisp.pl?gene=MIR324
SIRT2	Sirtuin 2	Protein Coding	55	GC19M038878	1.43301	https://www.genecards.org/cgi-bin/carddisp.pl?gene=SIRT2
MYD88	MYD88 Innate Immune Signal Transduction Adaptor	Protein Coding	56	GC03P038152	1.41011	https://www.genecards.org/cgi-bin/carddisp.pl?gene=MYD88
JUN	Jun Proto-Oncogene, AP-1 Transcription Factor Subunit	Protein Coding	55	GC01M058780	1.41011	https://www.genecards.org/cgi-bin/carddisp.pl?gene=JUN
BRD4	Bromodomain Containing 4	Protein Coding	55	GC19M015236	1.38541	https://www.genecards.org/cgi-bin/carddisp.pl?gene=BRD4
RB1	RB Transcriptional Corepressor 1	Protein Coding	55	GC13P048303	1.38541	https://www.genecards.org/cgi-bin/carddisp.pl?gene=RB1
AREL1	Apoptosis Resistant E3 Ubiquitin Protein Ligase 1	Protein Coding	43	GC14M074653	1.37308	https://www.genecards.org/cgi-bin/carddisp.pl?gene=AREL1
IKBKB	Inhibitor Of Nuclear Factor Kappa B Kinase Subunit Beta	Protein Coding	61	GC08P042271	1.35888	https://www.genecards.org/cgi-bin/carddisp.pl?gene=IKBKB
DAPK1	Death Associated Protein Kinase 1	Protein Coding	56	GC09P087497	1.35888	https://www.genecards.org/cgi-bin/carddisp.pl?gene=DAPK1
FKBP1A	FKBP Prolyl Isomerase 1A	Protein Coding	54	GC20M001369	1.35888	https://www.genecards.org/cgi-bin/carddisp.pl?gene=FKBP1A
CD274	CD274 Molecule	Protein Coding	52	GC09P005450	1.35888	https://www.genecards.org/cgi-bin/carddisp.pl?gene=CD274
MIR425	MicroRNA 425	RNA Gene	22	GC03M051544	1.35888	https://www.genecards.org/cgi-bin/carddisp.pl?gene=MIR425
EZH2	Enhancer Of Zeste 2 Polycomb Repressive Complex 2 Subunit	Protein Coding	60	GC07M148807	1.33003	https://www.genecards.org/cgi-bin/carddisp.pl?gene=EZH2
NFE2L2	NFE2 Like BZIP Transcription Factor 2	Protein Coding	57	GC02M177227	1.33003	https://www.genecards.org/cgi-bin/carddisp.pl?gene=NFE2L2
CHMP4B	Charged Multivesicular Body Protein 4B	Protein Coding	49	GC20P034119	1.33003	https://www.genecards.org/cgi-bin/carddisp.pl?gene=CHMP4B
CXCL5	C-X-C Motif Chemokine Ligand 5	Protein Coding	47	GC04M073995	1.33003	https://www.genecards.org/cgi-bin/carddisp.pl?gene=CXCL5
MIR29B1	MicroRNA 29b-1	RNA Gene	23	GC07M130877	1.33003	https://www.genecards.org/cgi-bin/carddisp.pl?gene=MIR29B1
BCL2	BCL2 Apoptosis Regulator	Protein Coding	57	GC18M063123	1.32794	https://www.genecards.org/cgi-bin/carddisp.pl?gene=BCL2
AXL	AXL Receptor Tyrosine Kinase	Protein Coding	59	GC19P041219	1.29811	https://www.genecards.org/cgi-bin/carddisp.pl?gene=AXL
MERTK	MER Proto-Oncogene, Tyrosine Kinase	Protein Coding	59	GC02P111898	1.29811	https://www.genecards.org/cgi-bin/carddisp.pl?gene=MERTK
TYRO3	TYRO3 Protein Tyrosine Kinase	Protein Coding	56	GC15P041557	1.29811	https://www.genecards.org/cgi-bin/carddisp.pl?gene=TYRO3
SIRT6	Sirtuin 6	Protein Coding	52	GC19M004174	1.29811	https://www.genecards.org/cgi-bin/carddisp.pl?gene=SIRT6
SLC39A7	Solute Carrier Family 39 Member 7	Protein Coding	50	GC06P033200	1.29811	https://www.genecards.org/cgi-bin/carddisp.pl?gene=SLC39A7
NAT2	N-Acetyltransferase 2	Protein Coding	47	GC08P018391	1.29811	https://www.genecards.org/cgi-bin/carddisp.pl?gene=NAT2
USP22	Ubiquitin Specific Peptidase 22	Protein Coding	47	GC17M020999	1.29811	https://www.genecards.org/cgi-bin/carddisp.pl?gene=USP22
PANX1	Pannexin 1	Protein Coding	52	GC11P094128	1.26188	https://www.genecards.org/cgi-bin/carddisp.pl?gene=PANX1
NAT1	N-Acetyltransferase 1	Protein Coding	50	GC08P018183	1.26188	https://www.genecards.org/cgi-bin/carddisp.pl?gene=NAT1
PDCD6IP	Programmed Cell Death 6 Interacting Protein	Protein Coding	50	GC03P033798	1.26188	https://www.genecards.org/cgi-bin/carddisp.pl?gene=PDCD6IP
FLOT1	Flotillin 1	Protein Coding	47	GC06M071649	1.26188	https://www.genecards.org/cgi-bin/carddisp.pl?gene=FLOT1
FLOT2	Flotillin 2	Protein Coding	47	GC17M051195	1.26188	https://www.genecards.org/cgi-bin/carddisp.pl?gene=FLOT2
IL37	Interleukin 37	Protein Coding	46	GC02P123799	1.26188	https://www.genecards.org/cgi-bin/carddisp.pl?gene=IL37
DIABLO	Diablo IAP-Binding Mitochondrial Protein	Protein Coding	53	GC12M122497	1.24785	https://www.genecards.org/cgi-bin/carddisp.pl?gene=DIABLO
FASN	Fatty Acid Synthase	Protein Coding	55	GC17M082078	1.21891	https://www.genecards.org/cgi-bin/carddisp.pl?gene=FASN
HNRNPA1	Heterogeneous Nuclear Ribonucleoprotein A1	Protein Coding	55	GC12P054280	1.21891	https://www.genecards.org/cgi-bin/carddisp.pl?gene=HNRNPA1
CDK9	Cyclin Dependent Kinase 9	Protein Coding	53	GC09P128100	1.21891	https://www.genecards.org/cgi-bin/carddisp.pl?gene=CDK9
TIMM50	Translocase Of Inner Mitochondrial Membrane 50	Protein Coding	45	GC19P039480	1.21891	https://www.genecards.org/cgi-bin/carddisp.pl?gene=TIMM50
SLC25A37	Solute Carrier Family 25 Member 37	Protein Coding	44	GC08P023528	1.21891	https://www.genecards.org/cgi-bin/carddisp.pl?gene=SLC25A37
PPP1R3G	Protein Phosphatase 1 Regulatory Subunit 3G	Protein Coding	38	GC06P005085	1.21891	https://www.genecards.org/cgi-bin/carddisp.pl?gene=PPP1R3G
MIR7-1	MicroRNA 7-1	RNA Gene	19	GC09M096204	1.21891	https://www.genecards.org/cgi-bin/carddisp.pl?gene=MIR7-1
NFKBIA	NFKB Inhibitor Alpha	Protein Coding	57	GC14M035401	1.16291	https://www.genecards.org/cgi-bin/carddisp.pl?gene=NFKBIA
AURKC	Aurora Kinase C	Protein Coding	54	GC19P073588	1.16291	https://www.genecards.org/cgi-bin/carddisp.pl?gene=AURKC
NGFR	Nerve Growth Factor Receptor	Protein Coding	54	GC17P049495	1.16291	https://www.genecards.org/cgi-bin/carddisp.pl?gene=NGFR
FMR1	Fragile X Messenger Ribonucleoprotein 1	Protein Coding	51	GC0XP147956	1.16291	https://www.genecards.org/cgi-bin/carddisp.pl?gene=FMR1
GNLY	Granulysin	Protein Coding	44	GC02P085685	1.13674	https://www.genecards.org/cgi-bin/carddisp.pl?gene=GNLY
PARP1	Poly(ADP-Ribose) Polymerase 1	Protein Coding	58	GC01M226360	1.09613	https://www.genecards.org/cgi-bin/carddisp.pl?gene=PARP1
HTRA2	HtrA Serine Peptidase 2	Protein Coding	52	GC02P074529	1.09613	https://www.genecards.org/cgi-bin/carddisp.pl?gene=HTRA2
HSPA5	Heat Shock Protein Family A (Hsp70) Member 5	Protein Coding	55	GC09M125234	1.07419	https://www.genecards.org/cgi-bin/carddisp.pl?gene=HSPA5
BIRC3	Baculoviral IAP Repeat Containing 3	Protein Coding	53	GC11P102317	1.07419	https://www.genecards.org/cgi-bin/carddisp.pl?gene=BIRC3
PRKAA2	Protein Kinase AMP-Activated Catalytic Subunit Alpha 2	Protein Coding	57	GC01P056645	1.051	https://www.genecards.org/cgi-bin/carddisp.pl?gene=PRKAA2
PRKAA1	Protein Kinase AMP-Activated Catalytic Subunit Alpha 1	Protein Coding	54	GC05M040759	1.051	https://www.genecards.org/cgi-bin/carddisp.pl?gene=PRKAA1
PITPNA	Phosphatidylinositol Transfer Protein Alpha	Protein Coding	47	GC17M006732	1.051	https://www.genecards.org/cgi-bin/carddisp.pl?gene=PITPNA
ANGPT2	Angiopoietin 2	Protein Coding	55	GC08M006499	1.02771	https://www.genecards.org/cgi-bin/carddisp.pl?gene=ANGPT2
METTL3	Methyltransferase 3, N6-Adenosine-Methyltransferase Complex Catalytic Subunit	Protein Coding	48	GC14M021498	1.02771	https://www.genecards.org/cgi-bin/carddisp.pl?gene=METTL3
TRAF5	TNF Receptor Associated Factor 5	Protein Coding	47	GC01P211326	1.02771	https://www.genecards.org/cgi-bin/carddisp.pl?gene=TRAF5
FNDC4	Fibronectin Type III Domain Containing 4	Protein Coding	42	GC02M027491	1.02771	https://www.genecards.org/cgi-bin/carddisp.pl?gene=FNDC4
FNDC5	Fibronectin Type III Domain Containing 5	Protein Coding	42	GC01M033245	1.02771	https://www.genecards.org/cgi-bin/carddisp.pl?gene=FNDC5
FASLG	Fas Ligand	Protein Coding	55	GC01P172628	1.0263	https://www.genecards.org/cgi-bin/carddisp.pl?gene=FASLG
PRKN	Parkin RBR E3 Ubiquitin Protein Ligase	Protein Coding	53	GC06M161348	1.0263	https://www.genecards.org/cgi-bin/carddisp.pl?gene=PRKN
TXN	Thioredoxin	Protein Coding	52	GC09M110243	1.0263	https://www.genecards.org/cgi-bin/carddisp.pl?gene=TXN
RALBP1	RalA Binding Protein 1	Protein Coding	51	GC18P009465	1.0263	https://www.genecards.org/cgi-bin/carddisp.pl?gene=RALBP1
TP53I3	Tumor Protein P53 Inducible Protein 3	Protein Coding	47	GC02M024078	1.0263	https://www.genecards.org/cgi-bin/carddisp.pl?gene=TP53I3
GSDMD	Gasdermin D	Protein Coding	45	GC08P143553	1.0263	https://www.genecards.org/cgi-bin/carddisp.pl?gene=GSDMD

## Sheet: Table S3
Table S3. Marker genes for various cell populations.
p_val	avg_log2FC	pct.1	pct.2	p_val_adj	cluster	gene
0	3.40787179427818	0.791	0.082	0	T_cells	TRAC
0	3.38667673353714	0.776	0.156	0	T_cells	TRBC2
0	3.19958501226249	0.605	0.104	0	T_cells	IL7R
0	2.60597857036755	0.642	0.098	0	T_cells	CD2
0	2.60501068697002	0.426	0.078	0	T_cells	TRBC1
0	2.30993370791932	0.475	0.032	0	T_cells	CD3D
0	2.2935131112589	0.531	0.083	0	T_cells	SPOCK2
0	2.25973599525704	0.446	0.15	0	T_cells	MAF
0	2.25538524760049	0.52	0.064	0	T_cells	CD3E
0	2.23538548254611	0.477	0.052	0	T_cells	BCL11B
0	2.18577530328175	0.463	0.035	0	T_cells	CD3G
0	2.11331584987053	0.316	0.02	0	T_cells	ICOS
0	2.10673079509931	0.273	0.041	0	T_cells	CD8A
0	2.0557045926612	0.498	0.106	0	T_cells	IL32
0	2.02549736959071	0.454	0.134	0	T_cells	CCL5
0	1.99337174854866	0.908	0.52	0	T_cells	CXCR4
0	1.87444441908571	0.431	0.064	0	T_cells	CD96
0	1.85613010771963	0.329	0.04	0	T_cells	TCF7
0	1.80131146472695	0.806	0.519	0	T_cells	ZFP36L2
0	1.66586840128753	0.622	0.338	0	T_cells	DNAJB1
0	1.63364594987334	0.35	0.099	0	T_cells	GPRIN3
0	1.62749744134827	0.385	0.122	0	T_cells	PTGER4
0	1.61978634673579	0.731	0.325	0	T_cells	ETS1
0	1.61958181641776	0.435	0.177	0	T_cells	LEPROTL1
0	1.61092233890873	0.368	0.078	0	T_cells	RASGRP1
0	1.58274569089246	0.469	0.235	0	T_cells	CNOT6L
0	1.57385215189553	0.407	0.133	0	T_cells	IKZF3
0	1.55738815234642	0.284	0.036	0	T_cells	SH2D1A
0	1.55244409910098	0.255	0.058	0	T_cells	DUSP16
0	1.53463611947314	0.315	0.044	0	T_cells	ITK
0	1.52839474497301	0.683	0.47	0	T_cells	SARAF
0	1.49105789995323	0.317	0.131	0	T_cells	DGKA
0	1.48085469587435	0.975	0.84	0	T_cells	RPS29
0	1.45866085503851	0.301	0.06	0	T_cells	CLEC2D
0	1.44987811450996	0.502	0.307	0	T_cells	RGCC
0	1.43553502663688	0.629	0.432	0	T_cells	AC005912.1
0	1.42737664595736	0.299	0.107	0	T_cells	PDE4D
0	1.41944944064565	0.388	0.174	0	T_cells	FYN
0	1.37783078097496	0.463	0.214	0	T_cells	SLC38A1
0	1.37036805723688	0.874	0.638	0	T_cells	BTG1
0	1.36070719678031	0.483	0.217	0	T_cells	EMB
0	1.33853943849057	0.266	0.04	0	T_cells	LCK
0	1.33490974462066	0.572	0.377	0	T_cells	SRSF7
0	1.33487827033334	0.685	0.48	0	T_cells	AC099560.2
0	1.33405068168918	0.578	0.211	0	T_cells	CD69
0	1.31566432778716	0.368	0.113	0	T_cells	GZMA
0	1.29331795238017	0.457	0.232	0	T_cells	SYNE2
0	1.28915370122786	0.915	0.725	0	T_cells	RPS3
0	1.28041674130951	0.687	0.457	0	T_cells	STK17B
0	1.25716468616513	0.708	0.449	0	T_cells	TNFAIP3
0	1.25282335659759	0.846	0.687	0	T_cells	RPLP2
0	1.2505364609587	0.582	0.304	0	T_cells	DUSP2
0	1.24746683033417	0.454	0.186	0	T_cells	CD52
0	1.24724894195652	0.801	0.352	0	T_cells	FYB1
0	1.21313174532438	0.629	0.293	0	T_cells	ARL4C
0	1.19192928258951	0.95	0.771	0	T_cells	RPS12
0	1.18894157997312	0.397	0.185	0	T_cells	LBH
0	1.18505196989662	0.431	0.21	0	T_cells	IKZF1
0	1.16728752746239	0.867	0.705	0	T_cells	RPL39P3
0	1.16028133179067	0.685	0.512	0	T_cells	RPL13A
0	1.15298269905392	0.979	0.85	0	T_cells	RPL34
0	1.09817602732786	0.861	0.699	0	T_cells	RPS21
0	1.0961404885978	0.912	0.75	0	T_cells	RPL11
0	1.09448980628878	0.836	0.679	0	T_cells	RPS15A
0	1.08758319155283	0.715	0.601	0	T_cells	RPL36
0	1.0851447924939	0.456	0.232	0	T_cells	RUNX3
0	1.0827125844517	0.952	0.795	0	T_cells	RPS27A
0	1.08008142629484	0.906	0.754	0	T_cells	RPL32
0	1.07897617905802	0.697	0.565	0	T_cells	RPS25
0	1.0787393954449	0.923	0.557	0	T_cells	PTPRC
0	1.07598071265105	0.675	0.55	0	T_cells	TOMM7
0	1.07282006067295	0.743	0.619	0	T_cells	RPL13
0	1.06743508145013	0.301	0.087	0	T_cells	FCMR
0	1.05721181515942	0.77	0.643	0	T_cells	RPL14
0	1.05548113742731	0.808	0.679	0	T_cells	RPS18
0	1.05139132954418	0.77	0.638	0	T_cells	RPS14
0	1.04996248950156	0.804	0.669	0	T_cells	RPL19
0	1.04525253177731	0.951	0.803	0	T_cells	RPL31
0	1.01694852088974	0.984	0.833	0	T_cells	RPS6
0	1.01631992214017	0.872	0.736	0	T_cells	RPL38
0	1.00466624202209	0.616	0.469	0	T_cells	MBNL1
0	0.98724368041507	0.968	0.815	0	T_cells	RPS20
0	0.968925468555319	0.736	0.612	0	T_cells	AL590867.2
0	0.967198496563855	0.844	0.778	0	T_cells	JUND
0	0.967119033859376	0.878	0.742	0	T_cells	RPL35A
0	0.965986782317462	0.622	0.444	0	T_cells	WIPF1
0	0.956432779292658	0.674	0.576	0	T_cells	RPL39
0	0.939338755765815	0.764	0.617	0	T_cells	RPL26P19
0	0.939110694270283	0.704	0.597	0	T_cells	EIF4A2
0	0.935134454793219	0.914	0.778	0	T_cells	RPL27A
0	0.934882036481649	0.735	0.593	0	T_cells	HSPA8
0	0.920137303167246	0.765	0.619	0	T_cells	RPS23
0	0.913708392452533	0.875	0.763	0	T_cells	HSP90AA1
0	0.911207148532427	0.94	0.774	0	T_cells	EEF1A1
0	0.906468176764083	0.89	0.766	0	T_cells	RPS16
0	0.899731029534836	0.86	0.707	0	T_cells	CALM1
0	0.888767852123626	0.753	0.644	0	T_cells	RPL3P4
0	0.862404046173586	0.803	0.691	0	T_cells	RPS19
0	0.856312400212222	0.918	0.794	0	T_cells	RPL37
0	0.851512750682441	0.759	0.639	0	T_cells	RPL10A
0	0.846726735328027	0.768	0.669	0	T_cells	RPS4X
0	0.830755751601741	0.814	0.685	0	T_cells	RPS17
0	0.801267997504066	0.892	0.765	0	T_cells	RPS13
0	0.786395524599617	0.828	0.707	0	T_cells	RPL5
0	0.773620998549576	0.788	0.615	0	T_cells	NAP1L1
0	0.769939191272201	0.843	0.784	0	T_cells	PABPC1
0	0.718770817151372	0.954	0.818	0	T_cells	RPS8
0	0.714779973512037	0.872	0.768	0	T_cells	RPS11
0	0.706432351447599	0.934	0.805	0	T_cells	RPL23
0	0.657245927993306	0.918	0.786	0	T_cells	RPS24
0	0.633566683642645	0.982	0.872	0	T_cells	MT-ND5
0	0.624195045447633	0.948	0.823	0	T_cells	MT-ND6
0	0.616501505831327	0.992	0.946	0	T_cells	TMSB4X
0	0.610528907006296	0.974	0.916	0	T_cells	HLA-A
0	0.5787507836951	0.994	0.948	0	T_cells	MT-ND2
0	0.560624360856725	0.994	0.924	0	T_cells	MT-CO1
0	0.53834439082645	0.994	0.948	0	T_cells	MT-CYB
0	0.487091485744231	0.988	0.978	0	T_cells	TPT1
0	0.431475652021118	0.998	0.994	0	T_cells	B2M
7.37991574436323e-307	1.33363235646866	0.288	0.102	1.81103132366674e-302	T_cells	RORA
5.1370899134806e-306	0.455580983944597	0.99	0.945	1.26064186476814e-301	T_cells	MT-ND1
2.01129255259162e-305	0.400668972230243	0.995	0.969	4.93571192405983e-301	T_cells	MT-ND4
1.15010411646716e-303	0.952903427036386	0.695	0.599	2.82235550181041e-299	T_cells	RPL10
5.74834190082687e-303	0.863093217698639	0.296	0.096	1.41064310246291e-298	T_cells	IL2RB
2.49821660985238e-298	0.8507011611067	0.744	0.659	6.13062356057773e-294	T_cells	RPL4
2.2600911384754e-295	1.01288019315071	0.579	0.352	5.54626365381864e-291	T_cells	RGS1
1.402073560718e-294	1.12149254040835	0.464	0.248	3.44068851800198e-290	T_cells	ITM2A
4.7135011318135e-290	0.59353820740303	0.881	0.774	1.15669317774703e-285	T_cells	MT-ND4L
6.88022066440015e-285	1.36239903459616	0.417	0.234	1.6884061510438e-280	T_cells	TOB1
1.06608765462313e-284	0.581012784186989	0.903	0.798	2.61617910444515e-280	T_cells	RPL37A
2.16309643095096e-282	1.07583992596878	0.602	0.489	5.30823864155366e-278	T_cells	RPL13AP5
7.27744121615728e-280	0.565416862790484	0.89	0.765	1.785884074445e-275	T_cells	PTMA
2.0283176572609e-276	1.1650169151641	0.407	0.222	4.97749153091825e-272	T_cells	CDC42SE2
3.0600831669744e-275	1.50130878673757	0.4	0.222	7.50944409175517e-271	T_cells	PIK3R1
1.14844955696225e-270	0.783290254699857	0.736	0.652	2.81829521278535e-266	T_cells	RPL27
3.72172823733341e-267	0.398168345748844	0.993	0.95	9.13312109441618e-263	T_cells	MT-CO3
1.91699868394213e-265	1.00272819418037	0.615	0.475	4.704314770394e-261	T_cells	TSC22D3
6.33170285384803e-264	0.571022810159186	0.889	0.776	1.55379988033431e-259	T_cells	MT-ATP8
6.92717653416182e-260	1.04757841879447	0.668	0.594	1.69992912148331e-255	T_cells	RPS28P7
2.19418047295081e-259	0.395226157527172	0.993	0.94	5.38451888062129e-255	T_cells	MT-ATP6
1.00927209474745e-257	1.1252476412504	0.297	0.115	2.47675372051024e-253	T_cells	LTB
1.32832631437581e-257	0.83603312199304	0.694	0.596	3.25971277547825e-253	T_cells	RPS2
2.90049151914902e-257	0.861754907163698	0.682	0.6	7.1178061879917e-253	T_cells	AC024293.1
4.91007216266442e-249	0.865334912082865	0.558	0.373	1.20493170871785e-244	T_cells	IL2RG
2.36243459585329e-248	1.13303419518607	0.252	0.089	5.79741449822398e-244	T_cells	ARAP2
1.42486810520183e-243	0.971695069894345	0.507	0.315	3.49662633016528e-239	T_cells	NR4A2
3.80877204133827e-243	0.712481078226618	0.767	0.683	9.3467265894441e-239	T_cells	RPL6P27
4.02870405889533e-240	0.968649669188347	0.437	0.239	9.88643976052913e-236	T_cells	FAM46C
1.18789597377767e-238	0.620012634333082	0.754	0.601	2.91509671965039e-234	T_cells	ARHGDIB
3.43581668580796e-237	0.566831987130924	0.752	0.568	8.43149414697272e-233	T_cells	RAC2
5.32427569526061e-237	1.24810315685947	0.37	0.192	1.30657725561695e-232	T_cells	ZNF331
3.28936104006917e-231	0.54528503101397	0.839	0.792	8.07209199232975e-227	T_cells	YWHAZ
4.52859714676128e-231	0.831416227323189	0.675	0.586	1.11131773981522e-226	T_cells	AC116533.1
1.29835672127372e-227	0.940963863976113	0.605	0.5	3.1861673940057e-223	T_cells	RPL9P9
1.64961781016584e-227	1.04425849234257	0.445	0.271	4.04816210614696e-223	T_cells	KIAA1551
5.71292050190905e-226	1.25822381259961	0.329	0.174	1.40195069116848e-221	T_cells	CDKN1B
2.0234134657358e-225	0.780765237553094	0.733	0.677	4.96545664491565e-221	T_cells	RPLP1
4.23954546419563e-223	1.02296386016515	0.551	0.446	1.04038445691361e-218	T_cells	AC034236.1
1.55948244466212e-220	0.99374725727123	0.302	0.134	3.82696991920084e-216	T_cells	ITGAL
1.53916794759226e-219	1.1265253372037	0.583	0.502	3.77711814339141e-215	T_cells	RPL28
5.6904519957431e-218	0.73742165975003	0.584	0.416	1.39643691975536e-213	T_cells	CD44
2.42870819090828e-216	0.293437536650878	0.456	0.251	5.96004990048891e-212	T_cells	GPR183
4.95169255540561e-211	0.330815110455908	0.984	0.944	1.21514535309654e-206	T_cells	MALAT1
3.75424529808035e-207	1.09873233880137	0.308	0.151	9.21291796148919e-203	T_cells	RHOH
6.86564018008537e-205	1.28263084578305	0.259	0.113	1.68482810019295e-200	T_cells	TSPYL2
8.83894541386641e-205	1.00985842216035	0.537	0.439	2.16907720456282e-200	T_cells	RPL34P18
3.25589378853226e-204	1.0162768274823	0.507	0.395	7.98996335705817e-200	T_cells	AP001324.1
5.04107149713569e-203	1.20161017748782	0.474	0.358	1.2370789453971e-198	T_cells	LDHB
4.53821797335101e-201	1.01101033765166	0.457	0.311	1.11367869066034e-196	T_cells	FAM107B
5.04046044590753e-201	0.338281099689795	0.992	0.959	1.23692899342571e-196	T_cells	MT-ND3
1.15676921624774e-200	1.07382118281829	0.353	0.198	2.83871165667196e-196	T_cells	TNFAIP8
1.49633581080985e-199	1.03948722958063	0.509	0.404	3.67200807972737e-195	T_cells	RPS27AP16
5.07904512238042e-199	1.03562182827987	0.489	0.37	1.24639767303216e-194	T_cells	PPP2R5C
6.89249909588727e-199	1.15655708618399	0.284	0.137	1.69141927813074e-194	T_cells	PBXIP1
5.12044473026644e-193	0.88162283836956	0.59	0.499	1.25655713680738e-188	T_cells	RPS3AP6
2.01024417375415e-185	0.971203038200684	0.368	0.219	4.93313920239268e-181	T_cells	MLLT6
1.59732541047194e-182	0.907077230468192	0.268	0.125	3.91983655729813e-178	T_cells	CD48
5.51835067876617e-179	0.683083790918195	0.691	0.631	1.35420325656922e-174	T_cells	RPS5
2.64839583761516e-178	1.10677705672884	0.269	0.133	6.49916338550759e-174	T_cells	EML4
4.19781694230753e-173	0.792504669421667	0.609	0.537	1.03014427764227e-168	T_cells	NPM1
1.15279966192166e-170	1.01404773285073	0.346	0.207	2.82897037035575e-166	T_cells	HECA
1.4743071621872e-168	1.08118585811528	0.437	0.323	3.61794977600739e-164	T_cells	WNK1
6.31853746371858e-168	0.90342273294182	0.562	0.494	1.55056909359654e-163	T_cells	ANP32B
8.13454056396852e-168	0.939292351851177	0.295	0.154	1.99621625439788e-163	T_cells	PRKCH
1.39950171914431e-166	0.674193784980017	0.655	0.595	3.43437721878014e-162	T_cells	RPL26
2.13462929049727e-165	0.736111481063376	0.687	0.589	5.23838027888031e-161	T_cells	AHNAK
3.08541329991933e-165	0.937945296378712	0.405	0.269	7.57160423800202e-161	T_cells	PIP4K2A
8.04570449940506e-165	1.03644898178179	0.35	0.216	1.974415884154e-160	T_cells	CYLD
5.84795623972844e-161	0.566055600456255	0.778	0.745	1.43508846122936e-156	T_cells	DDX5
8.69153779265177e-158	1.14369760373201	0.371	0.248	2.13290337431674e-153	T_cells	KMT2A
7.37775986868141e-157	1.06209964549137	0.383	0.262	1.81050227177442e-152	T_cells	RPS27
5.92159593289799e-156	1.0235258404345	0.315	0.182	1.45315964193317e-151	T_cells	PAG1
2.01329002777748e-153	1.01560137455213	0.28	0.147	4.94061372816594e-149	T_cells	CD4
1.87217344186251e-151	1.18889744804756	0.283	0.159	4.59431362633061e-147	T_cells	RNF19A
2.15654431962745e-150	0.8942406095976	0.461	0.324	5.29215976036576e-146	T_cells	ID2
1.1323463333027e-149	0.946494528650737	0.486	0.407	2.77877790192482e-145	T_cells	RPL14P1
1.94099699179423e-148	0.847173774599756	0.432	0.305	4.76320661786303e-144	T_cells	STK4
2.05029787943645e-148	0.753684876389995	0.615	0.562	5.03143099613704e-144	T_cells	SRSF5
1.27823396782616e-147	0.990345485905998	0.422	0.32	3.1367861570454e-143	T_cells	RPL30
1.6286444945038e-147	0.945426780638481	0.309	0.185	3.99669358951233e-143	T_cells	AC099336.2
2.5649332229834e-147	0.608185147560233	0.701	0.647	6.29434612920125e-143	T_cells	RACK1
1.50714708400308e-146	0.716011677477544	0.663	0.612	3.69853894414355e-142	T_cells	RPL29
1.94713668502849e-146	0.288327739886676	0.994	0.957	4.77827342505992e-142	T_cells	MT-CO2
6.91369885244846e-146	1.05812538078723	0.273	0.144	1.69662169839085e-141	T_cells	GIMAP7
9.0877929317287e-146	0.810351592030159	0.547	0.478	2.23014438544622e-141	T_cells	HNRNPDL
8.70372313950444e-144	0.945038824089134	0.386	0.265	2.13589365843439e-139	T_cells	FNBP1
4.58163893722053e-143	1.01206405540092	0.329	0.205	1.12433419519392e-138	T_cells	ATM
5.50598948507905e-143	0.666980261423235	0.67	0.617	1.3511698196384e-138	T_cells	RPL8
5.68773961126256e-143	0.985889666541747	0.363	0.244	1.39577130060383e-138	T_cells	SEPT6
3.76358977756552e-141	0.815474810562596	0.386	0.251	9.23584931414579e-137	T_cells	BIRC3
8.10466804320084e-140	0.945587575073012	0.518	0.452	1.98888553780149e-135	T_cells	SRSF2
2.24353600675341e-138	1.06092756882893	0.379	0.264	5.50563736057286e-134	T_cells	SLFN5
2.61772263692427e-137	0.989838385030824	0.39	0.285	6.42389135101217e-133	T_cells	SEPT9
4.71260161823028e-132	0.78396112977765	0.457	0.335	1.15647243711371e-127	T_cells	CREM
1.10526592088751e-126	0.94966335898947	0.251	0.138	2.71232256985796e-122	T_cells	RBL2
2.95207053936493e-125	0.917031205299486	0.284	0.17	7.24438110360154e-121	T_cells	PRKACB
5.52263066644585e-125	0.676321635806177	0.382	0.245	1.35525356554581e-120	T_cells	MBP
2.21444452802002e-120	0.953077204845894	0.366	0.256	5.43424687176113e-116	T_cells	CCND2
3.95881964947223e-119	0.757461809429018	0.264	0.145	9.71494341980485e-115	T_cells	SPN
3.12606862329555e-116	0.757922715591025	0.393	0.277	7.67137240156728e-112	T_cells	CELF2
5.67421515808753e-116	0.786685099828542	0.561	0.512	1.39245239979468e-111	T_cells	YPEL5
5.87090185313583e-116	0.779618373669456	0.448	0.346	1.44071931475953e-111	T_cells	EZR
4.04552651382482e-115	0.902551227802287	0.494	0.436	9.92772206492612e-111	T_cells	BRD2
1.82392012943005e-114	0.939076471919971	0.465	0.392	4.47589999762134e-110	T_cells	ANKRD12
2.05925385781205e-112	0.917170378002697	0.422	0.336	5.05340896707077e-108	T_cells	PRPF38B
3.56160462540903e-109	0.714667346518076	0.547	0.505	8.74017775075376e-105	T_cells	RPS7
2.05822797477826e-108	0.835307746216975	0.453	0.375	5.05089145010585e-104	T_cells	AL161909.1
1.05471188769018e-103	0.833301253317392	0.423	0.339	2.5882629723917e-99	T_cells	ELF1
3.32903011320058e-103	0.817012771206918	0.486	0.433	8.16943989779421e-99	T_cells	SF3B1
6.60583329432713e-103	0.851156683875041	0.276	0.176	1.62107149042788e-98	T_cells	LPXN
3.74641747873631e-102	0.808414199378326	0.266	0.158	9.19370849281891e-98	T_cells	IQGAP2
6.39420544874687e-102	0.568927584115203	0.334	0.209	1.56913801712248e-97	T_cells	SLA
3.63118264684744e-101	0.434726586113088	0.711	0.641	8.91092221536363e-97	T_cells	PTMAP2
9.16759105462754e-101	0.842402367791168	0.469	0.415	2.2497268448056e-96	T_cells	AC136632.1
2.98009582602548e-100	0.600714397926806	0.66	0.634	7.31315515706653e-96	T_cells	YWHAB
7.09174221841944e-98	0.52505024676539	0.582	0.479	1.74031354040013e-93	T_cells	S100A4
3.15656289377419e-97	0.91229718118872	0.258	0.164	7.74620534132186e-93	T_cells	PDCD4
1.29559309915396e-96	0.774529090521221	0.366	0.268	3.17938546532381e-92	T_cells	RNF213
3.30418745151569e-96	0.555216011680958	0.655	0.636	8.1084760060195e-92	T_cells	NACA
2.86052431649755e-95	0.930938663161974	0.258	0.166	7.01972667268499e-91	T_cells	CCSER2
1.10854051399246e-94	0.270814461702112	0.266	0.144	2.72035842133751e-90	T_cells	NKG7
1.94516168422826e-94	0.781604794297782	0.451	0.401	4.77342677309615e-90	T_cells	EEF1A1P5
9.8137401018858e-91	0.368412483465578	0.825	0.861	2.40829182100277e-86	T_cells	EIF1
8.62534433813912e-89	0.330980661556324	0.796	0.782	2.11665950057934e-84	T_cells	PFN1
1.13578646341426e-87	0.593502489110268	0.268	0.158	2.7872199812186e-83	T_cells	CST7
3.16608455910879e-86	0.755114531701748	0.674	0.686	7.76957150805296e-82	T_cells	JUNB
1.00972124304769e-84	0.927299765332888	0.385	0.324	2.47785593043903e-80	T_cells	DDX24
6.49611417965101e-84	0.744855472898594	0.497	0.466	1.59414641968636e-79	T_cells	RPL12
5.33236783410666e-82	0.765926808756673	0.459	0.421	1.30856306648977e-77	T_cells	HNRNPA1
2.67344578357731e-81	0.825054791011411	0.411	0.354	6.56063595289872e-77	T_cells	TMEM123
1.12900311466529e-80	0.845635539758605	0.42	0.368	2.77057364338863e-76	T_cells	AC004453.1
3.05515659881271e-80	0.834375689526461	0.429	0.379	7.49735429348639e-76	T_cells	SOD1
1.96686196980549e-79	0.741033888170169	0.342	0.26	4.82667927390268e-75	T_cells	DIAPH1
2.64811758343736e-78	0.784972832590578	0.468	0.432	6.49848054975529e-74	T_cells	SRSF11
5.5938163394602e-78	0.543423034121502	0.62	0.592	1.37272252970353e-73	T_cells	BTF3
1.93663566947882e-77	0.736251052378456	0.462	0.423	4.75250393290103e-73	T_cells	RPL10AP6
1.17126365550717e-76	0.552316664457496	0.587	0.574	2.8742810106146e-72	T_cells	RPL7A
1.03494519594346e-75	0.799830357460977	0.43	0.384	2.53975551084525e-71	T_cells	COMMD6
4.61621352015556e-75	0.686526522571549	0.506	0.491	1.13281879784617e-70	T_cells	RPL24
8.46818787371184e-75	0.874296369802474	0.268	0.172	2.07809330420889e-70	T_cells	CCL4
1.12266935960005e-73	0.818663948537367	0.301	0.223	2.75503060845853e-69	T_cells	LNPEP
1.1765607301205e-73	0.689792886217373	0.473	0.439	2.88728003171572e-69	T_cells	RPS7P1
2.53730718669241e-73	0.369011864834667	0.719	0.688	6.22655183614318e-69	T_cells	RPL15
1.03441231975334e-72	0.870525236854784	0.326	0.261	2.53844783267469e-68	T_cells	RPS15AP24
1.93762422661724e-72	0.960964010758239	0.301	0.226	4.7549298521187e-68	T_cells	GCC2
5.02344723903435e-72	0.71855944059812	0.512	0.497	1.23275395245903e-67	T_cells	SON
2.13763082992006e-71	1.10388875568409	0.309	0.246	5.24574605662382e-67	T_cells	CLDND1
3.02590973888487e-71	0.80754134720953	0.385	0.337	7.42558249922347e-67	T_cells	RPL3
1.36928603710327e-69	0.776068370749138	0.428	0.394	3.36022793505144e-65	T_cells	HNRNPH1
2.56595518007572e-69	0.809946422637997	0.372	0.319	6.29685401190582e-65	T_cells	RPS3AP26
8.49632997985523e-68	0.810993361262573	0.402	0.358	2.08499937705647e-63	T_cells	CLK1
2.08027989423357e-67	0.674836856049087	0.324	0.243	5.10500686044919e-63	T_cells	CYTIP
3.52675543229453e-67	0.846894163280163	0.254	0.176	8.65465783085078e-63	T_cells	TIPARP
6.29701606469477e-67	0.82514152664713	0.315	0.248	1.5452877422761e-62	T_cells	ATF7IP
1.15636769846051e-65	0.898098399816943	0.297	0.23	2.83772633202209e-61	T_cells	C9orf78
5.81237689490988e-65	0.804349245391011	0.387	0.334	1.42635729001088e-60	T_cells	RSRP1
6.67142535242154e-65	0.716507359697583	0.462	0.437	1.63716778148425e-60	T_cells	RPL6
1.07255168261769e-64	0.749866134092299	0.439	0.399	2.63204182914381e-60	T_cells	KMT2E
4.07355968130088e-62	0.399004426114999	0.717	0.666	9.99651545791235e-58	T_cells	HSP90AB1
9.63450863619193e-62	0.563639664807697	0.554	0.55	2.3643084193215e-57	T_cells	NCL
1.78537515583708e-61	0.827680709370952	0.304	0.239	4.38131063242419e-57	T_cells	PSIP1
8.20713035543385e-61	0.732393969247686	0.273	0.2	2.01402978922347e-56	T_cells	CITED2
1.91773506809853e-60	0.591718438449626	0.563	0.567	4.7061218571138e-56	T_cells	PFDN5
6.41525998637296e-59	0.605240494686713	0.528	0.532	1.57430480065592e-54	T_cells	FAU
2.18974208141926e-58	0.773367504243016	0.426	0.398	5.37362706780287e-54	T_cells	RPS15
3.21227281428517e-57	0.718265094584766	0.429	0.402	7.8829174862558e-53	T_cells	RAD21
4.18481267404562e-57	0.564052553321368	0.538	0.546	1.0269530302108e-52	T_cells	RBM39
2.7174817792293e-56	0.680337519745132	0.504	0.496	6.6687002862287e-52	T_cells	PRRC2C
5.84699350018923e-56	0.624337324515541	0.462	0.444	1.43485220494644e-51	T_cells	SF1
6.01795097112697e-56	0.781777489781514	0.318	0.259	1.47680516831456e-51	T_cells	RPS6KA3
7.6907718201123e-56	0.696913973925195	0.425	0.391	1.88731540465556e-51	T_cells	RPS23P8
1.06498849382694e-55	0.674361760874409	0.371	0.318	2.61348176385131e-51	T_cells	SH3KBP1
4.31012291372668e-55	0.533518163025574	0.642	0.632	1.05770416302853e-50	T_cells	KLF6
1.97126306224355e-54	0.655286462466105	0.305	0.238	4.83747955474567e-50	T_cells	HMGB2
8.90249581648282e-54	0.663455491571045	0.447	0.425	2.18467247336488e-49	T_cells	ARF6
6.45215921892677e-53	0.447585582503626	0.632	0.654	1.58335987232463e-48	T_cells	CCNI
1.21904754054787e-52	0.668109374453956	0.475	0.47	2.99154266450447e-48	T_cells	SFPQ
1.14839613203507e-51	0.629792397061327	0.453	0.429	2.81816410801407e-47	T_cells	HINT1
1.669707129507e-51	0.620035169560072	0.517	0.52	4.09746129581017e-47	T_cells	UBA52
2.28307327677677e-50	0.71972966879926	0.427	0.41	5.6026618212102e-46	T_cells	RPL22
2.28874463188543e-49	0.788370927852812	0.331	0.289	5.61657932664686e-45	T_cells	SNHG5
7.99866422112109e-48	0.372331484002442	0.673	0.668	1.96287219986312e-43	T_cells	MTATP6P1
1.41974366576968e-47	0.641343525528674	0.329	0.271	3.4840509557988e-43	T_cells	ADD3
1.91382516442495e-47	0.711162048420323	0.358	0.324	4.69652695349883e-43	T_cells	Z74021.1
1.69951009161306e-44	0.826957252310635	0.264	0.211	4.17059776481845e-40	T_cells	NKTR
2.47540684320691e-44	0.687268442913999	0.318	0.27	6.07464839322976e-40	T_cells	FXYD5
3.00707633997213e-44	0.767883349041949	0.342	0.304	7.37936533829162e-40	T_cells	AL450405.1
7.39494603130242e-44	0.323910976190339	0.73	0.739	1.81471975608161e-39	T_cells	HNRNPA2B1
3.11122565892364e-43	0.727088461048805	0.352	0.318	7.63494776699862e-39	T_cells	RPSA
3.89192998723724e-43	0.38449176114507	0.286	0.213	9.55079618868019e-39	T_cells	ARHGAP9
4.2775691857053e-43	0.545430693276504	0.4	0.359	1.04971547817208e-38	T_cells	IDS
6.72803794560825e-43	0.741573659099446	0.351	0.319	1.65106051185226e-38	T_cells	RPS28
7.15614071000174e-43	0.659353434436042	0.311	0.261	1.75611693023443e-38	T_cells	UHMK1
1.7568952052682e-40	0.721562269403814	0.382	0.369	4.31142083372816e-36	T_cells	RPL4P4
2.58715839240687e-40	0.55811283716969	0.269	0.21	6.34888669496646e-36	T_cells	DOCK8
7.46142352819977e-40	0.491268213876487	0.544	0.562	1.83103333382022e-35	T_cells	EEF2
6.70901201987484e-39	0.761584820401291	0.27	0.228	1.64639154967729e-34	T_cells	G3BP2
1.49677109017555e-37	0.664089424135042	0.286	0.241	3.67307625529079e-33	T_cells	ZC3HAV1
2.78737649879739e-37	0.66950462068963	0.399	0.38	6.84022192804879e-33	T_cells	RPL18
4.88636197377445e-36	0.642907662964972	0.421	0.418	1.19911322836425e-31	T_cells	MATR3
8.46617675303464e-36	0.686880295290642	0.323	0.297	2.0775997751947e-31	T_cells	NPM1P27
1.10076651432932e-35	0.693105706804613	0.321	0.296	2.70128102616414e-31	T_cells	RPL34P27
1.12380115273545e-35	0.625481069146985	0.446	0.454	2.75780802881278e-31	T_cells	EEF1B2
1.68851861399398e-35	0.757399396200831	0.351	0.332	4.14362467874122e-31	T_cells	SRRM1
5.61669566397881e-35	0.650956718185571	0.342	0.315	1.3783371159404e-30	T_cells	VAMP2
1.19740034277798e-32	0.61614896255357	0.344	0.317	2.93842044117715e-28	T_cells	AKAP13
2.28696073694337e-32	0.579136487203614	0.259	0.21	5.61220164845904e-28	T_cells	RAB27A
9.34750568821683e-32	0.764663901213459	0.258	0.219	2.29387789588841e-27	T_cells	VPS13C
4.26051353068356e-31	0.305263278945549	0.722	0.753	1.04553002042974e-26	T_cells	ATP5E
7.21603349976128e-31	0.720120090811869	0.294	0.263	1.77081462084142e-26	T_cells	PHF3
8.31124446232293e-31	0.646482107379243	0.253	0.219	2.03957939105405e-26	T_cells	AL031727.1
8.42868318821115e-31	0.57783125939999	0.43	0.435	2.06839885438702e-26	T_cells	SRSF3
9.861428561197e-31	0.670314636774395	0.301	0.275	2.41999456891774e-26	T_cells	AC073861.1
1.02323528438232e-30	0.255246781102511	0.21	0.324	2.51101938787422e-26	T_cells	GOLGA4
1.90190966507365e-30	0.575712458304599	0.395	0.375	4.66728631809074e-26	T_cells	ARID4B
2.8798128435374e-30	0.621681999675436	0.279	0.237	7.06706071804079e-26	T_cells	TMX4
6.30081371891325e-30	0.6306360748987	0.25	0.207	1.54621968662131e-25	T_cells	PIM1
7.45464340091566e-30	0.605295909776801	0.43	0.428	1.8293694905847e-25	T_cells	ARL6IP5
9.02989084940536e-30	0.697474803341465	0.37	0.364	2.21593521444408e-25	T_cells	TERF2IP
8.95979139126166e-28	0.463952787010852	0.566	0.616	2.19873280741561e-23	T_cells	DDX17
1.03045155725023e-27	0.641560848637707	0.384	0.379	2.52872812149206e-23	T_cells	BCLAF1
1.5458947734379e-27	0.737167954582242	0.281	0.257	3.79362577401662e-23	T_cells	GSTK1
6.65793154453818e-27	0.5004495552827	0.502	0.52	1.63385640102967e-22	T_cells	LDHA
8.01319883464162e-27	0.524743510021796	0.522	0.566	1.96643899402105e-22	T_cells	PTP4A2
1.12174239091486e-26	0.649244795205661	0.318	0.295	2.75275582730506e-22	T_cells	PNRC2
1.25469460762597e-26	0.677130551015841	0.279	0.256	3.07902056711414e-22	T_cells	AL049873.1
2.35254244436088e-26	0.699035208727022	0.269	0.241	5.7731391584616e-22	T_cells	WDR82
3.91101399731307e-26	0.500403272460844	0.414	0.409	9.59762834940627e-22	T_cells	JAK1
1.05583997849874e-24	0.60262970380596	0.305	0.277	2.59103130723591e-20	T_cells	HLA-F
8.82071948686247e-24	0.271893984805308	0.189	0.285	2.16460456207605e-19	T_cells	ATPIF1
2.54046955420244e-23	0.670292545278746	0.31	0.302	6.23431228601279e-19	T_cells	AC016739.1
2.80403215011465e-23	0.765379854268411	0.254	0.225	6.88109489638136e-19	T_cells	APOBEC3C
2.90909515262708e-22	0.684795011676265	0.322	0.31	7.13891950454686e-18	T_cells	BPTF
5.48023379155334e-22	0.581494122340805	0.3	0.285	1.34484937244719e-17	T_cells	RPS11P5
7.52308280138044e-22	0.638791781301206	0.255	0.228	1.84616451945876e-17	T_cells	ATP2B4
1.41662639524594e-21	0.638966603658769	0.276	0.256	3.47640117393353e-17	T_cells	GLS
6.80018020753743e-21	0.59575558234822	0.302	0.284	1.66876422292969e-16	T_cells	CAB39
1.37211656495822e-20	0.589640850465043	0.348	0.338	3.36717405040748e-16	T_cells	MACF1
1.61601652013287e-20	0.439098814463639	0.32	0.278	3.96570454040607e-16	T_cells	UCP2
2.13781279210291e-20	0.602940148160432	0.406	0.419	5.24619259182054e-16	T_cells	RBM25
2.15347175179389e-19	0.598527236449902	0.324	0.307	5.28461967890221e-15	T_cells	IER5
4.59973588004435e-19	0.607817207412058	0.289	0.279	1.12877518496288e-14	T_cells	RPS3A
1.03671109053736e-18	0.610600836291397	0.346	0.354	2.54408901617867e-14	T_cells	EIF4B
1.09698926360519e-16	0.602165898927624	0.348	0.355	2.69201165288713e-12	T_cells	RBMX
1.35844220913339e-16	0.269070934387388	0.192	0.274	3.33361718121335e-12	T_cells	ZC3H15
3.69142459670099e-16	0.27648777444546	0.303	0.269	9.05875596030424e-12	T_cells	RASSF5
8.32436222612318e-16	0.665233166295626	0.301	0.303	2.04279849029063e-11	T_cells	RPL12P4
3.02338494412834e-15	0.57349363349544	0.418	0.45	7.41938665289095e-11	T_cells	UQCRB
1.17010863273286e-14	0.489357221721363	0.27	0.257	2.87144658472645e-10	T_cells	TMSB4XP8
2.25558943309586e-14	0.57949585830158	0.381	0.408	5.53521646881725e-10	T_cells	EIF3H
3.94312045114059e-14	0.516023384970489	0.306	0.298	9.67641758709901e-10	T_cells	DEK
6.73597800805049e-14	0.41761004661599	0.448	0.475	1.65300900317559e-09	T_cells	SEPT7
7.0325214471579e-14	0.289074107391949	0.214	0.302	1.72578076313255e-09	T_cells	YME1L1
1.04893843640554e-13	0.572722172160358	0.3	0.303	2.5740949229392e-09	T_cells	RPL23P8
3.39556385322577e-13	0.273795576627284	0.204	0.286	8.33271369581604e-09	T_cells	ST13
5.79784069912872e-13	0.567317494952152	0.313	0.319	1.42279010756619e-08	T_cells	LSM14A
8.25451338816088e-13	0.503210577221264	0.35	0.356	2.02565758545468e-08	T_cells	TAF7
3.04633817659354e-12	0.586387428440807	0.346	0.369	7.47571388536055e-08	T_cells	HP1BP3
3.88836314480823e-12	0.286149013807297	0.283	0.262	9.5420431573594e-08	T_cells	IRF1
1.11396719502398e-11	0.279242252814907	0.186	0.256	2.73367549658884e-07	T_cells	FXR1
1.36669527572372e-10	0.265892366340795	0.191	0.259	3.35387020662601e-06	T_cells	HSPA9
4.63486128733847e-10	0.606285758270299	0.304	0.318	1.13739495991286e-05	T_cells	NSA2
1.0369968484581e-09	0.273499025967735	0.196	0.263	2.54479026611618e-05	T_cells	ZNF207
1.52452906204593e-09	0.264496738506105	0.278	0.375	3.74119431826071e-05	T_cells	SERBP1
1.55809428693573e-09	0.491875891574926	0.285	0.284	3.82356338014028e-05	T_cells	MGEA5
1.55967418321034e-09	0.57287584580748	0.299	0.308	3.82744044559817e-05	T_cells	SMARCA2
1.72603690516254e-09	0.625715117596209	0.276	0.284	4.23569456526888e-05	T_cells	RSL1D1
2.0718825438987e-09	0.316524638611311	0.226	0.3	5.0843997627274e-05	T_cells	LUC7L3
3.43634852336166e-09	0.284716149862009	0.248	0.331	8.43279927632953e-05	T_cells	ERP29
7.59495684011454e-09	0.257953624648208	0.295	0.389	0.000186380240856411	T_cells	KIF5B
7.85874600153002e-09	0.318999707000993	0.188	0.25	0.000192853626877547	T_cells	TAOK1
1.10418495001629e-08	0.389585201227681	0.461	0.511	0.000270966986733998	T_cells	SET
1.13598110063281e-08	0.575656579718829	0.28	0.29	0.000278769762095292	T_cells	EEF1B2P3
1.18493687357746e-08	0.608188070744579	0.25	0.252	0.00029078350877591	T_cells	NSD3
2.32704763509131e-08	0.474464401456297	0.282	0.28	0.000571057489651407	T_cells	FOXP1
2.93401435986816e-08	0.269245956056105	0.299	0.397	0.000720007123911647	T_cells	HMGB1
5.7294753423397e-08	0.361561263917886	0.193	0.259	0.00140601324901016	T_cells	STT3B
7.89964482398651e-08	0.286154899074418	0.265	0.351	0.00193857283980629	T_cells	SYNCRIP
8.22238413112791e-08	0.292622075211796	0.517	0.589	0.00201777306577879	T_cells	HNRNPC
1.71758222694013e-07	0.29356401954663	0.481	0.533	0.00421494678491108	T_cells	DDX3X
2.26036541459146e-07	0.544759803451397	0.324	0.352	0.00554693672740745	T_cells	SNRPD2
3.82079625647646e-07	0.415274705862655	0.361	0.383	0.00937623401339323	T_cells	PTBP3
4.38477050082701e-07	0.572605745717659	0.271	0.286	0.0107602268090295	T_cells	C6orf48
5.6301532392721e-07	0.522371548529698	0.317	0.335	0.0138163960491737	T_cells	TPR
6.8102179825401e-07	0.379733299959688	0.452	0.516	0.0167122749291534	T_cells	CSDE1
8.37929346265924e-07	0.352172192982862	0.217	0.283	0.0205627861573658	T_cells	TTC3
9.70914897015309e-07	0.321292389899216	0.207	0.272	0.0238262515727557	T_cells	POLR1D
9.91917302743384e-07	0.48976279089048	0.314	0.335	0.0243416506093226	T_cells	IRF2BP2
1.17441027329451e-06	0.520014120042993	0.279	0.287	0.0288200281066472	T_cells	NIPBL
2.4422175178968e-06	0.528672159596188	0.294	0.319	0.0599320178891874	T_cells	RPS13P2
4.07052216108916e-06	0.359003598005947	0.205	0.267	0.099890613833128	T_cells	SMDT1
4.91369745616407e-06	0.319622054699758	0.472	0.525	0.120582135574266	T_cells	RPS9
6.69617895157196e-06	0.541117537680874	0.341	0.372	0.164324231471576	T_cells	ATRX
6.74646109352675e-06	0.34256442620744	0.269	0.355	0.165558155235147	T_cells	C11orf58
7.76371903505739e-06	0.572281398284806	0.245	0.253	0.190521665120308	T_cells	OIP5-AS1
9.22467034621203e-06	0.527185261545852	0.243	0.251	0.226373410296043	T_cells	C6orf62
1.07297246202827e-05	0.346528990107692	0.226	0.293	0.263307442181738	T_cells	H2AFV
1.16192465775511e-05	0.557215564123225	0.268	0.284	0.285136311013104	T_cells	RSRC2
1.6959587274324e-05	0.300590683465664	0.2	0.252	0.416188271711911	T_cells	KMT2C
1.70026658674076e-05	0.91530710337729	0.336	0.367	0.417245420386184	T_cells	HSPA1B
1.84689194436633e-05	0.338847895318174	0.29	0.378	0.453227283147497	T_cells	PEBP1
2.32577370066886e-05	0.550177460249342	0.251	0.261	0.570744866144138	T_cells	NR3C1
2.38407741043324e-05	0.322545865821252	0.241	0.31	0.585052596520317	T_cells	MBD2
2.90107887146352e-05	0.503273153901105	0.317	0.341	0.711924755057148	T_cells	PNN
3.56287828466367e-05	0.262490745145631	0.201	0.254	0.874330331056464	T_cells	GDI1
4.03459773703716e-05	0.275039147714284	0.288	0.369	0.990090284668919	T_cells	KPNB1
4.04928621296615e-05	0.495482201742663	0.304	0.333	0.993694836661894	T_cells	FO393411.1
4.78762653382221e-05	0.308778926414566	0.227	0.288	1	T_cells	EFCAB14
8.84336846749119e-05	0.342853297117723	0.201	0.256	1	T_cells	MAPK1IP1L
9.55910002772825e-05	0.390417614029475	0.266	0.34	1	T_cells	MAN1A2
0.000110145084675131	0.327390293044593	0.462	0.526	1	T_cells	HNRNPU
0.000128638578169702	0.302972228047411	0.229	0.289	1	T_cells	EP300
0.000149798612401904	0.29792937542182	0.201	0.25	1	T_cells	NASP
0.000153740754611979	0.29460926338062	0.263	0.331	1	T_cells	ADAR
0.000167243829631797	0.327276716360495	0.29	0.369	1	T_cells	SLC38A2
0.000179080672530939	0.516516992522813	0.299	0.33	1	T_cells	EIF3E
0.000257305648944725	0.419083907141203	0.388	0.433	1	T_cells	PLP2
0.000260987617011297	0.363122660119919	0.352	0.38	1	T_cells	ROCK1
0.000261066198047905	0.375687924767183	0.213	0.273	1	T_cells	HNRNPL
0.000272346099099384	0.486088102756874	0.267	0.285	1	T_cells	ARID1A
0.000272985507940001	0.481579527209766	0.266	0.287	1	T_cells	AC010343.1
0.000278373513335967	0.388685080294222	0.397	0.455	1	T_cells	WAC
0.000287626399348344	0.372238869043468	0.258	0.327	1	T_cells	PRPF40A
0.000297063095641617	0.370388966246568	0.248	0.32	1	T_cells	PTGES3
0.000321008101081553	0.477503925453531	0.372	0.428	1	T_cells	COX7C
0.000326751568599957	0.506975423810382	0.264	0.28	1	T_cells	SLTM
0.000442314599814956	0.324048572305582	0.241	0.304	1	T_cells	YWHAQ
0.000485955718113768	0.467332075606303	0.341	0.386	1	T_cells	HNRNPUL1
0.000495174535568707	0.393900176833267	0.236	0.3	1	T_cells	EIF3K
0.000496826809371301	0.406038010976866	0.362	0.404	1	T_cells	FUS
0.000501253655704781	0.531059339242192	0.238	0.254	1	T_cells	RPL24P4
0.000553834118536827	0.40202202573033	0.406	0.465	1	T_cells	SRRM2
0.000697548104870168	0.339995873458418	0.23	0.291	1	T_cells	SKP1
0.000706291183436264	0.257279129990891	0.23	0.284	1	T_cells	RBMS1
0.000810038820212421	0.304943141754392	0.274	0.349	1	T_cells	UBE2D2
0.000920194363465822	0.40899244909642	0.324	0.356	1	T_cells	RAP1A
0.00117946266475645	0.327327533299397	0.45	0.518	1	T_cells	ATP5G2
0.00122545316939191	0.350583790950379	0.309	0.398	1	T_cells	SAP18
0.00133438712655013	0.252660554093154	0.352	0.448	1	T_cells	RBM3
0.00135873424651341	0.44382418225385	0.301	0.323	1	T_cells	PPP1R12A
0.00163234613207126	0.437369827051634	0.257	0.271	1	T_cells	SETX
0.00246574726997734	0.428536419836849	0.365	0.417	1	T_cells	HMGN1
0.00252147742947998	0.381538424204496	0.331	0.369	1	T_cells	PPP1CB
0.00256011121861499	0.273459270235044	0.253	0.313	1	T_cells	CD47
0.00269715214063543	0.509424589906667	0.29	0.324	1	T_cells	CMPK1
0.00269752194393324	0.325408594045733	0.273	0.342	1	T_cells	EWSR1
0.00288040321639148	0.447122954469342	0.342	0.384	1	T_cells	SCAF11
0.00342797669830823	0.575267620802262	0.256	0.276	1	T_cells	HSPH1
0.00346459318481024	0.3103076473595	0.226	0.276	1	T_cells	BRD4
0.00380207137067566	0.27852597499923	0.35	0.44	1	T_cells	XRCC5
0.0038160805783533	0.421725357757754	0.284	0.309	1	T_cells	ATP1A1
0.00433171330070126	0.478882915632414	0.247	0.307	1	T_cells	AKAP9
0.00442558634798851	0.299204359771304	0.455	0.515	1	T_cells	UBC
0.00468336339126178	0.282909667722173	0.312	0.392	1	T_cells	TMEM50A
0.00691507813675375	0.346436040217102	0.243	0.299	1	T_cells	GOLGA7
0.00697698741692619	0.491516592946607	0.303	0.341	1	T_cells	RPL35
0.00999594537311626	0.321317069921565	0.323	0.403	1	T_cells	CBX3
0	4.97007463301037	0.857	0.048	0	NK_cells	GNLY
0	3.65639251612648	0.769	0.072	0	NK_cells	PRF1
0	3.53987379921266	0.587	0.021	0	NK_cells	FGFBP2
0	3.34548976897384	0.849	0.13	0	NK_cells	NKG7
0	3.19827399418307	0.705	0.03	0	NK_cells	KLRD1
0	2.94227750904025	0.526	0.047	0	NK_cells	CX3CR1
0	2.84014427564987	0.651	0.062	0	NK_cells	GZMB
0	2.79071278915716	0.566	0.067	0	NK_cells	FCGR3A
0	2.42295363603616	0.389	0.005	0	NK_cells	KLRF1
0	2.29587654582673	0.366	0.054	0	NK_cells	SPON2
0	2.28050946883324	0.742	0.158	0	NK_cells	GZMA
0	2.18636216987042	0.455	0.058	0	NK_cells	GZMH
0	2.13692475390773	0.378	0.011	0	NK_cells	TRDC
0	2.0574454181338	0.587	0.131	0	NK_cells	IL2RB
0	2.03689943745925	0.382	0.043	0	NK_cells	CTSW
0	1.91275826307233	0.279	0.004	0	NK_cells	SH2D1B
0	1.89389503349912	0.322	0.015	0	NK_cells	S1PR5
0	1.82524004621313	0.586	0.173	0	NK_cells	CCL4
0	1.75422038393337	0.538	0.157	0	NK_cells	SPN
0	1.73646919227977	0.465	0.105	0	NK_cells	PLAC8
0	1.73221352401174	0.705	0.209	0	NK_cells	CCL5
0	1.73064463794513	0.781	0.382	0	NK_cells	ARL4C
0	1.72480358734156	0.704	0.278	0	NK_cells	RUNX3
0	1.61494049698519	0.3	0.036	0	NK_cells	TBX21
0	1.60332551215583	0.745	0.34	0	NK_cells	ID2
0	1.58585321327306	0.272	0.026	0	NK_cells	TRGC1
0	1.46541984108353	0.305	0.054	0	NK_cells	CD247
0	1.28170345057253	0.269	0.041	0	NK_cells	HOPX
2.84768030543202e-298	1.51083	0.356	0.082	6.98820746953017e-294	NK_cells	PTPN4
3.58044118849339e-267	1.28417769769491	0.371	0.092	8.78640267656279e-263	NK_cells	KLRB1
2.10085691936742e-262	1.48027769019185	0.37	0.096	5.15550288012764e-258	NK_cells	PYHIN1
2.165725438377e-253	1.45143680201274	0.494	0.172	5.31469022577716e-249	NK_cells	CST7
1.92632935638232e-243	0.711543666919987	0.999	0.995	4.7272122405622e-239	NK_cells	B2M
1.30147663572325e-240	1.47590127720855	0.339	0.09	3.19382366406484e-236	NK_cells	TGFBR3
1.30783635581354e-236	0.886423073436914	0.953	0.665	3.20943041716644e-232	NK_cells	PTPRC
1.19663872765011e-234	1.36264827638381	0.64	0.304	2.93655143765338e-230	NK_cells	ITGB2
2.45360933828217e-231	1.3591044265367	0.598	0.268	6.02115731614443e-227	NK_cells	MBP
2.7396081937512e-216	1.39432052772665	0.611	0.318	6.72299850746544e-212	NK_cells	EFHD2
4.98293394529282e-207	0.581812832122757	0.999	0.967	1.22281199017486e-202	NK_cells	MT-CO2
1.19563279191798e-199	0.598418587514496	0.999	0.945	2.93408287136673e-195	NK_cells	MT-CO1
3.60128683941964e-190	0.914611967434177	0.907	0.749	8.83755790393579e-186	NK_cells	CALM1
1.4105989721952e-183	1.14146515979579	0.755	0.52	3.46160987776703e-179	NK_cells	MSN
2.44827692508464e-181	0.933216552628525	0.862	0.614	6.0080715741577e-177	NK_cells	RAC2
8.78591877179211e-172	1.22341065213481	0.561	0.296	2.15606446659778e-167	NK_cells	PIP4K2A
2.15368069345094e-163	1.2086660084583	0.426	0.174	5.2851324217286e-159	NK_cells	ITGAL
7.94637596963246e-163	1.4240399314668	0.705	0.464	1.95004066294781e-158	NK_cells	TXNIP
7.94819031933183e-163	0.669568019678417	0.991	0.959	1.95048590436403e-158	NK_cells	HLA-B
3.79680813464591e-158	1.07388072498736	0.392	0.149	9.31736716242105e-154	NK_cells	FGR
3.28891149333224e-157	0.619012456594254	0.988	0.932	8.07098880463732e-153	NK_cells	HLA-A
2.53480774882957e-149	0.818589363741126	0.889	0.778	6.22041821562776e-145	NK_cells	PFN1
5.10544534516525e-146	1.38709025207398	0.453	0.225	1.25287628770355e-141	NK_cells	APMAP
1.21011477569101e-142	0.52856172306608	0.976	0.938	2.96962165954574e-138	NK_cells	HLA-C
4.61548898719665e-132	1.40338726619933	0.267	0.088	1.13264099745806e-127	NK_cells	CD7
8.49809131253942e-132	0.509370837508527	0.995	0.96	2.08543160809717e-127	NK_cells	TMSB4X
1.49737182430846e-131	1.11768281353393	0.336	0.131	3.67455045685295e-127	NK_cells	APOBEC3G
2.02749532679479e-131	1.32739541040518	0.309	0.12	4.9754735319544e-127	NK_cells	GNPTAB
2.58053415346842e-127	0.964878164147602	0.254	0.08	6.33263081261151e-123	NK_cells	SH2D2A
2.15990058947471e-125	0.41861925334414	0.999	0.976	5.30039604657095e-121	NK_cells	MT-ND4
1.01432877742871e-124	0.80796354071276	0.704	0.45	2.48916281981007e-120	NK_cells	ETS1
3.06281672158137e-122	1.19010415254653	0.522	0.294	7.51615223476068e-118	NK_cells	SYNE2
2.57717494447665e-121	0.906498114343354	0.325	0.124	6.32438731374569e-117	NK_cells	GBP5
2.82174273736623e-119	1.18526666994029	0.474	0.262	6.92455667749673e-115	NK_cells	UHMK1
3.55358850003383e-119	1.12686591083327	0.394	0.183	8.72050617908301e-115	NK_cells	BIN2
2.5752727084939e-114	1.08367350675244	0.494	0.276	6.31971922664403e-110	NK_cells	BHLHE40
2.07013580572509e-113	0.988085305498186	0.329	0.134	5.08011326724937e-109	NK_cells	CYFIP2
5.01547234898178e-113	1.12324182604904	0.301	0.121	1.23079691444013e-108	NK_cells	GNG2
1.50418572016978e-109	1.17465261937519	0.352	0.161	3.69127175729665e-105	NK_cells	SYNE1
1.21337599285455e-107	1.19918368864468	0.371	0.177	2.97762468646506e-103	NK_cells	CCND3
1.17003450102667e-104	0.845011594059263	0.628	0.423	2.87126466551945e-100	NK_cells	IL2RG
2.42386985543879e-101	0.40549578908968	0.998	0.955	5.94817662524678e-97	NK_cells	MT-ATP6
1.61968732515394e-100	0.578655746059251	0.8	0.576	3.97471269592776e-96	NK_cells	LCP1
2.24262831302014e-99	0.987869870840757	0.382	0.189	5.50340988015143e-95	NK_cells	PRKCH
9.01228241068377e-95	0.914567764003841	0.611	0.452	2.2116141035818e-90	NK_cells	SEPT7
6.81058589196165e-93	0.903291206127672	0.607	0.386	1.67131777788739e-88	NK_cells	DUSP2
2.24522402067402e-92	0.797712778453349	0.667	0.509	5.50977974673403e-88	NK_cells	MBNL1
5.43385870246008e-91	1.11974424717563	0.356	0.188	1.3334689255837e-86	NK_cells	TPST2
4.77270795388775e-90	0.537913974893742	0.896	0.801	1.17122253188406e-85	NK_cells	YWHAZ
7.19798882669309e-89	0.523094575742084	0.785	0.608	1.76638645807048e-84	NK_cells	ZFP36L2
8.8053248521358e-88	1.18431709077218	0.258	0.11	2.16082671871412e-83	NK_cells	RASSF1
1.47801306302999e-86	1.01257986869108	0.399	0.221	3.62704405667559e-82	NK_cells	APOBEC3C
7.38950389756209e-86	1.07955167410683	0.394	0.22	1.81338425646174e-81	NK_cells	APOL6
2.47793664505866e-81	0.930166652315724	0.558	0.398	6.08085652697396e-77	NK_cells	JAK1
2.77646699880288e-81	0.729437922528214	0.372	0.18	6.81345001506227e-77	NK_cells	CD96
1.46072385551563e-79	0.461667366555282	0.964	0.86	3.58461634143535e-75	NK_cells	MT-ND6
1.41045677961036e-78	0.911921580480557	0.515	0.335	3.46126093716381e-74	NK_cells	SNORD3A
3.07989865996857e-76	1.05597490947565	0.446	0.283	7.55807131156287e-72	NK_cells	CCND2
5.94894601297808e-76	0.479055094888678	0.901	0.805	1.45987135158482e-71	NK_cells	MT-ND4L
6.69036814348369e-76	0.284340072109905	0.391	0.187	1.6418163424109e-71	NK_cells	TRBC1
8.28345256457153e-76	0.399353389775539	0.99	0.905	2.03275925934585e-71	NK_cells	MT-ND5
2.95507384839907e-75	0.698378654452169	0.654	0.495	7.25175122397131e-71	NK_cells	WIPF1
7.07321557093707e-75	0.527912272293033	0.901	0.854	1.73576710110796e-70	NK_cells	CFL1
7.36487176544237e-75	0.828123102287656	0.291	0.135	1.80733953123956e-70	NK_cells	ARAP2
1.33617576578422e-74	1.02578710877453	0.373	0.217	3.27897532923447e-70	NK_cells	TES
3.36578248412859e-74	0.672542408980445	0.768	0.665	8.25963021605157e-70	NK_cells	ACTR2
3.15391085158233e-73	1.0964525409083	0.288	0.144	7.73969722978304e-69	NK_cells	RAB29
3.68829575334962e-73	0.976602235376565	0.442	0.278	9.05107777871996e-69	NK_cells	ADD3
6.84675676962585e-73	0.920794268411067	0.489	0.329	1.68019411126618e-68	NK_cells	MACF1
6.626427878974e-72	0.791302535967226	0.25	0.107	1.62612540150022e-67	NK_cells	SKAP1
7.65569150875575e-72	1.07705244416158	0.324	0.178	1.87870669624866e-67	NK_cells	RAP2B
2.1507749173384e-71	0.814488185890128	0.652	0.541	5.27800164714843e-67	NK_cells	PTP4A2
4.45503277595867e-71	1.02387840242138	0.396	0.239	1.09326504322026e-66	NK_cells	LNPEP
2.87991188022304e-70	0.487258585832459	0.837	0.712	7.06730375406735e-66	NK_cells	BTG1
3.37001273522339e-70	0.923787183804462	0.42	0.26	8.2700112522382e-66	NK_cells	MLLT6
1.22034278223506e-68	0.854524245422992	0.344	0.184	2.99472118760484e-64	NK_cells	IQGAP2
2.59216613297087e-68	0.797048775794173	0.458	0.279	6.36117569031053e-64	NK_cells	UCP2
4.29203110839335e-68	0.752634431550417	0.401	0.223	1.05326443399973e-63	NK_cells	SLAMF7
1.23090934046164e-67	0.900867600711047	0.453	0.292	3.02065152149287e-63	NK_cells	SLFN5
4.0921500995064e-66	0.32168417360905	0.997	0.963	1.00421363441887e-61	NK_cells	MT-CO3
4.5163290565926e-65	0.858565693805739	0.253	0.118	1.10830715048782e-60	NK_cells	RNF125
1.77972379548074e-64	0.96247965503084	0.327	0.182	4.36744219410974e-60	NK_cells	BTN3A2
2.15063512921203e-64	0.838941704391555	0.35	0.199	5.27765860708633e-60	NK_cells	PRKACB
5.13370142753147e-64	0.771267418247258	0.548	0.423	1.25981033031622e-59	NK_cells	ARF6
1.59192187409374e-63	1.11313707996151	0.28	0.151	3.90657627902603e-59	NK_cells	SSBP3
2.80107667770649e-63	0.785877464326483	0.464	0.306	6.87384216709173e-59	NK_cells	CELF2
4.85220967892954e-63	0.658954954131073	0.706	0.619	1.19073225520931e-58	NK_cells	ARPC2
5.86405825303945e-62	0.752315804482441	0.271	0.131	1.43903989529588e-57	NK_cells	PARP8
8.05002548216505e-62	0.557895070990899	0.804	0.73	1.9754762533233e-57	NK_cells	HNRNPA2B1
1.01173543075326e-61	0.920612923019022	0.422	0.278	2.48279874706851e-57	NK_cells	DIAPH1
3.54743732071471e-61	0.953348791928907	0.264	0.131	8.7054111850339e-57	NK_cells	SELPLG
1.55888994551667e-60	0.620635761048386	0.525	0.327	3.82551592629791e-56	NK_cells	CD69
6.72188608937515e-60	0.574617659594214	0.664	0.503	1.64955084633266e-55	NK_cells	S100A4
9.25872977649454e-60	0.891272546624709	0.384	0.237	2.27209228715176e-55	NK_cells	ATM
1.3797200252407e-59	0.412330002230423	0.905	0.809	3.38583294194067e-55	NK_cells	MT-ATP8
1.52017156061639e-59	0.838333937439374	0.268	0.136	3.73050100975263e-55	NK_cells	SLC9A3R1
3.66575104098102e-59	0.740416697517603	0.436	0.276	8.99575305456743e-55	NK_cells	IKZF1
6.82330309784223e-58	0.871672469990192	0.522	0.403	1.67443858021048e-53	NK_cells	PPP2R5C
6.61284981077232e-57	0.706946579529598	0.32	0.17	1.62279334356353e-52	NK_cells	RASGRP1
2.38014439406524e-56	0.453642965820687	0.885	0.796	5.84087434303611e-52	NK_cells	HSP90AA1
7.08038422699566e-56	0.85451570863797	0.266	0.139	1.73752628930473e-51	NK_cells	ARHGEF3
1.50759744724412e-55	0.634270638460522	0.65	0.542	3.69964413553708e-51	NK_cells	IQGAP1
1.887352303744e-55	0.55145438781188	0.734	0.62	4.63156255338778e-51	NK_cells	TPM3
2.59406171235295e-55	0.335869446937185	0.894	0.85	6.36582744211413e-51	NK_cells	HLA-E
6.36941393419628e-55	0.783581012751242	0.403	0.258	1.56305417945177e-50	NK_cells	IRF1
1.42499014099326e-54	0.611889228271815	0.328	0.177	3.49692580599746e-50	NK_cells	SORL1
1.59814956289606e-53	0.527988691847508	0.731	0.615	3.92185902734692e-49	NK_cells	AHNAK
7.46515800803389e-51	0.801181291587619	0.417	0.284	1.83194977517152e-46	NK_cells	CTSC
7.53107437663332e-51	0.78893767498237	0.43	0.292	1.84812565202582e-46	NK_cells	RNF213
4.70963149597874e-50	0.728929648113641	0.309	0.176	1.15574356911318e-45	NK_cells	ARHGAP30
1.92050208050159e-49	0.767528107872962	0.415	0.274	4.7129121055509e-45	NK_cells	PIK3R1
6.26395651683139e-48	0.745987708267397	0.255	0.135	1.53717492923042e-43	NK_cells	NFATC2
1.85933930324602e-47	0.385073637141248	0.37	0.213	4.56281865016573e-43	NK_cells	TYROBP
1.77165761722431e-46	0.46191594747673	0.4	0.243	4.34764779266844e-42	NK_cells	RIPOR2
1.85509732623264e-46	0.757250400309723	0.283	0.159	4.55240883857489e-42	NK_cells	RORA
1.96860088887272e-46	0.748392149836421	0.404	0.277	4.83094658129367e-42	NK_cells	HLA-F
2.28920180620607e-46	0.847028831877123	0.378	0.255	5.61770123242971e-42	NK_cells	UTRN
6.77180145371661e-45	0.582481332588368	0.433	0.292	1.66180007674206e-40	NK_cells	SLC38A1
1.54838358156866e-44	0.52120412001801	0.528	0.385	3.79973330916949e-40	NK_cells	CD53
4.73865807493353e-44	0.734152798374562	0.294	0.173	1.16286669158869e-39	NK_cells	ITGA4
5.13249506220096e-44	0.865729295645889	0.277	0.16	1.25951428826412e-39	NK_cells	SAMD9
6.1615506588139e-44	0.896255223019938	0.305	0.189	1.51204453167293e-39	NK_cells	ZEB2
5.3965796725001e-43	0.388199534243434	0.45	0.279	1.32432065163153e-38	NK_cells	CD2
2.57716249275188e-42	0.798775904059295	0.302	0.18	6.3243567572131e-38	NK_cells	GIMAP7
9.20452864012012e-41	0.505435408118957	0.726	0.637	2.25879132828548e-36	NK_cells	HSPA8
2.73638217883212e-40	0.53222511432805	0.647	0.568	6.71508186685402e-36	NK_cells	ACTR3
4.09166749810897e-40	0.705820175124545	0.338	0.218	1.00409520403594e-35	NK_cells	RAB27A
5.45228655667733e-40	0.86590295939653	0.269	0.166	1.33799112100862e-35	NK_cells	PTPN12
5.82754768337655e-39	0.906848800002034	0.264	0.162	1.43008020150061e-34	NK_cells	PTPN18
1.41671085647225e-37	0.62574378868041	0.561	0.487	3.4766084417829e-33	NK_cells	SET
4.37455388206806e-37	0.485012406906884	0.707	0.638	1.0735155226595e-32	NK_cells	YWHAB
7.65802281258427e-37	0.255347793599226	0.387	0.238	1.87927879820818e-32	NK_cells	FCER1G
3.4801901633277e-36	0.729865620918558	0.282	0.177	8.54038666080617e-32	NK_cells	PLEKHA2
5.5940515559659e-36	0.710339846230521	0.459	0.359	1.37278025183403e-31	NK_cells	PRPF38B
9.49762141294662e-36	0.824736793426643	0.305	0.205	2.3307162947371e-31	NK_cells	MAPK1
1.65814698708851e-35	0.494624498734546	0.679	0.632	4.06909270631519e-31	NK_cells	EIF4A2
2.39126070916165e-35	0.56859188040615	0.4	0.272	5.86815378028269e-31	NK_cells	CD52
2.62091762203621e-35	0.469868790783478	0.373	0.243	6.43173184447686e-31	NK_cells	SLA
5.67572453318681e-35	0.737843762820772	0.255	0.153	1.39282280044404e-30	NK_cells	GIMAP4
7.23083662504149e-35	0.63589521812598	0.354	0.24	1.77444730778518e-30	NK_cells	PREX1
9.26894288892388e-35	0.622207051388686	0.562	0.498	2.27459858494192e-30	NK_cells	HNRNPDL
2.13419915703268e-34	0.603138221574116	0.423	0.31	5.2373247313582e-30	NK_cells	CNOT6L
1.57452100179524e-33	0.625139893875727	0.256	0.153	3.86387453840553e-29	NK_cells	AKNA
1.92323432092699e-33	0.424305514459769	0.722	0.665	4.71961702355482e-29	NK_cells	MTATP6P1
4.07050689263446e-33	0.484757509717962	0.342	0.221	9.98902391452496e-29	NK_cells	IKZF3
5.67672151348049e-33	0.574160305538154	0.6	0.547	1.39306745940811e-28	NK_cells	NCL
7.97450091266972e-33	0.757998142474706	0.407	0.32	1.95694252396915e-28	NK_cells	PSME1
3.28829003208373e-32	0.546607607023373	0.386	0.272	8.06946373873347e-28	NK_cells	RASSF5
6.55204729015281e-32	0.674604576378444	0.475	0.39	1.6078724050035e-27	NK_cells	FOSL2
1.05553463443622e-31	0.565749134385062	0.446	0.342	2.59028199290648e-27	NK_cells	STK4
1.11220702161978e-31	0.808157052015145	0.313	0.214	2.72935603105493e-27	NK_cells	PIM1
2.28584365709511e-31	0.857327991863153	0.25	0.156	5.60946033451141e-27	NK_cells	ERAP2
2.05569734508066e-29	0.498575564403608	0.353	0.238	5.04468128482794e-25	NK_cells	IL32
2.8632310574535e-29	0.429628951569851	0.907	0.863	7.02636901499088e-25	NK_cells	ACTG1
4.8825858722182e-29	0.521184464729462	0.338	0.23	1.19818657304235e-24	NK_cells	ARHGAP9
2.4767756312207e-28	0.565295430855232	0.343	0.243	6.0780073990156e-24	NK_cells	FYN
2.82640932740214e-28	0.723936174708944	0.436	0.362	6.93600848944486e-24	NK_cells	CAST
5.79610567908685e-28	0.33380242532724	0.782	0.755	1.42236433364791e-23	NK_cells	DDX5
4.18865127436465e-27	0.647100711089656	0.291	0.2	1.02789502272908e-22	NK_cells	LBR
8.8413252499487e-27	0.678137809119181	0.32	0.231	2.16966121633741e-22	NK_cells	ATP2B4
1.37315092910954e-26	0.81009999569523	0.358	0.286	3.36971238003482e-22	NK_cells	CD47
3.12283211470434e-26	0.637709388247353	0.265	0.176	7.66343000948445e-22	NK_cells	IFITM1
3.66967051756629e-26	0.376726713278597	0.263	0.164	9.00537145010768e-22	NK_cells	PRSS23
4.37694309794697e-26	0.309934597665464	0.735	0.649	1.07410183623619e-21	NK_cells	ARHGDIB
5.77346253407698e-26	0.763285736928853	0.393	0.327	1.41680770586249e-21	NK_cells	CD164
8.94192831774895e-26	0.253702	0.892	0.803	2.19434920917559e-21	NK_cells	PTMA
5.29372142524481e-25	0.490118867401858	0.354	0.253	1.29907923775508e-20	NK_cells	LBH
1.78816179130048e-24	0.59794169725441	0.261	0.176	4.38814903585137e-20	NK_cells	INPP5D
3.13203760334332e-24	0.450520027576949	0.406	0.305	7.6860202786045e-20	NK_cells	EMB
9.12420437345376e-24	0.689177689589968	0.253	0.175	2.23907975324555e-19	NK_cells	DHRS7
2.66712526935792e-23	0.481473541607254	0.554	0.49	6.54512541100434e-19	NK_cells	ARPC5
3.37613440932296e-23	0.60087333651189	0.274	0.191	8.28503384047853e-19	NK_cells	RAB8B
1.45311803511755e-22	0.598345381265406	0.372	0.297	3.56595165817847e-18	NK_cells	PNRC2
6.33911265239498e-22	0.573127218539443	0.487	0.445	1.55561824489773e-17	NK_cells	HNRNPA3
1.01169533652291e-21	0.617941070964281	0.27	0.192	2.48270035582723e-17	NK_cells	CCDC88C
3.39420768582632e-21	0.595014709390538	0.382	0.309	8.3293856610178e-17	NK_cells	PPP1R12A
4.36379395286466e-21	0.638456003676892	0.289	0.213	1.07087503603299e-16	NK_cells	ERBIN
5.45997367900151e-21	0.676336329307673	0.307	0.232	1.33987754082697e-16	NK_cells	KDM5A
1.0871135294503e-20	0.631315503355391	0.366	0.295	2.66777660127104e-16	NK_cells	DEK
1.68314895696883e-20	0.671946313082578	0.268	0.198	4.13044754040151e-16	NK_cells	MAT2B
1.94890878847266e-20	0.5144763066329	0.25	0.17	4.78262216691191e-16	NK_cells	PDE4D
4.75838683991202e-20	0.469080761575358	0.512	0.473	1.16770813051441e-15	NK_cells	SRSF2
5.10451195361831e-20	0.489775719024807	0.362	0.282	1.25264723341793e-15	NK_cells	CDC42SE2
6.59411721922105e-20	0.396073430113431	0.644	0.617	1.61819636559685e-15	NK_cells	CDC42
1.25027848702844e-19	0.279510422113552	0.713	0.666	3.0681834071678e-15	NK_cells	RPL26P19
1.95950452568202e-19	0.510046081635538	0.406	0.341	4.80862410602367e-15	NK_cells	SP100
1.99175806100817e-19	0.686791777367675	0.276	0.21	4.88777428171405e-15	NK_cells	EIF4EBP2
2.02188948544914e-19	0.481259869374661	0.268	0.189	4.9617167972922e-15	NK_cells	PRKCB
4.58777387954511e-18	0.706372624607481	0.268	0.205	1.12583971004037e-13	NK_cells	DCAF7
8.30066576455658e-18	0.692637759108909	0.294	0.235	2.03698337862218e-13	NK_cells	ADAM10
9.13442273149886e-18	0.554458277565478	0.291	0.224	2.24158733830982e-13	NK_cells	DDX6
1.10857435451864e-17	0.489970992837091	0.316	0.242	2.72044146598873e-13	NK_cells	FAM49B
1.998572932274e-17	0.460260884215662	0.476	0.424	4.9044979758004e-13	NK_cells	ARL6IP5
2.51317481237759e-17	0.413367296934452	0.548	0.493	6.1673309895746e-13	NK_cells	CD99
2.83124171646365e-17	0.345726008194164	0.605	0.579	6.9478671722018e-13	NK_cells	SRSF5
3.10188028919927e-17	0.446664738396466	0.355	0.28	7.61201422969502e-13	NK_cells	VAMP8
7.16794617677064e-17	0.632891235155568	0.361	0.309	1.75901399177952e-12	NK_cells	MAN1A2
1.08255082942147e-16	0.428402749155952	0.454	0.378	2.6565797354003e-12	NK_cells	NR4A2
1.26505184784944e-16	0.289260691297814	0.595	0.534	3.10443723462253e-12	NK_cells	STK17B
2.14166644119659e-16	0.583368366486183	0.373	0.32	5.25564944669643e-12	NK_cells	VAMP2
2.8554641831963e-16	0.576083301598084	0.417	0.375	7.00730910556372e-12	NK_cells	MTPN
5.91100842615119e-16	0.538888084970474	0.406	0.363	1.4505614677775e-11	NK_cells	TERF2IP
4.85123383889941e-15	0.448977817731624	0.548	0.542	1.19049278406591e-10	NK_cells	RBM39
5.40807398225735e-15	0.535399936063202	0.306	0.245	1.32714135524595e-10	NK_cells	STOM
6.35329718655682e-15	0.445122002124198	0.415	0.364	1.55909912958104e-10	NK_cells	PPP1R18
2.19220403628518e-14	0.493258910251198	0.364	0.304	5.37966870504383e-10	NK_cells	FNBP1
2.39134937791834e-14	0.429706464872096	0.424	0.373	5.86837137341161e-10	NK_cells	IER2
2.79979605115845e-14	0.519704870536317	0.48	0.454	6.87069950954284e-10	NK_cells	PDIA3
4.11105950259716e-14	0.420810214010258	0.483	0.454	1.00885400193734e-09	NK_cells	BRD2
1.26767197013246e-13	0.334014405766202	0.282	0.211	3.11086701470507e-09	NK_cells	PTGER4
7.95636068850355e-13	0.604204055907572	0.295	0.247	1.95249091295877e-08	NK_cells	TAOK3
1.00307329319182e-12	0.471536231692994	0.408	0.366	2.46154186149272e-08	NK_cells	ROCK1
2.64142300837443e-12	0.42742342626864	0.413	0.372	6.48205206255084e-08	NK_cells	PTBP3
5.00515498121598e-12	0.545802378159789	0.309	0.262	1.2282650323904e-07	NK_cells	SETX
5.85309222835116e-12	0.366838878542463	0.46	0.433	1.43634883283737e-07	NK_cells	HNRNPA1
6.80068607441919e-12	0.570070826167018	0.317	0.279	1.66888836266247e-07	NK_cells	YWHAQ
9.46811487580572e-12	0.400269794656823	0.449	0.419	2.32347539052272e-07	NK_cells	MYL12A
9.6774239917281e-12	0.383855996212894	0.474	0.437	2.37483984757008e-07	NK_cells	LRRFIP1
1.15550863912428e-11	0.456261306299481	0.394	0.35	2.83561820041099e-07	NK_cells	RSRP1
1.86476329082097e-11	0.438720833519432	0.388	0.35	4.57612911567466e-07	NK_cells	TAF7
2.48675283640976e-11	0.447326412120119	0.439	0.411	6.10249146054956e-07	NK_cells	KMT2E
6.71108138647709e-11	0.449628724704419	0.502	0.502	1.64689937224148e-06	NK_cells	SON
7.20983207265883e-11	0.369010585725473	0.408	0.36	1.76929279063048e-06	NK_cells	FAM107B
8.60367216305177e-11	0.458854077301255	0.461	0.443	2.1113411488129e-06	NK_cells	SRSF11
1.58747365586162e-10	0.48528289689171	0.295	0.25	3.89566035148441e-06	NK_cells	C9orf78
3.07927832147582e-10	0.447279430814849	0.296	0.248	7.55654900090166e-06	NK_cells	TMX4
3.66721548107265e-10	0.49164413812685	0.296	0.258	8.99934679055228e-06	NK_cells	TMSB4XP8
4.22425816521564e-10	0.479725789282949	0.288	0.248	1.03663295374392e-05	NK_cells	WDR82
4.85042478018714e-10	0.358392022327946	0.51	0.498	1.19029424105793e-05	NK_cells	PRRC2C
7.13377338370449e-10	0.368904177837962	0.25	0.2	1.75062798836108e-05	NK_cells	RNF19A
1.39800429100982e-09	0.308957300174174	0.327	0.272	3.43070253013811e-05	NK_cells	SAMHD1
2.35273595806385e-09	0.307182425214352	0.261	0.212	5.7736140410887e-05	NK_cells	CLEC2B
7.08245380399324e-09	0.4507530301533	0.392	0.367	0.000173803416349994	NK_cells	SCAF11
7.76768374958135e-09	0.372842543524495	0.502	0.503	0.000190618959214726	NK_cells	HNRNPU
1.04024663552195e-08	0.43933240563925	0.364	0.34	0.000255276524357087	NK_cells	PPIAP22
1.04215255752865e-08	0.445684961589458	0.408	0.391	0.000255744237617531	NK_cells	TLN1
1.54699238548135e-08	0.432249345296038	0.265	0.219	0.000379631931397123	NK_cells	REL
1.94405982023145e-08	0.463643057463548	0.295	0.263	0.000477072279884797	NK_cells	EFCAB14
1.94963747996485e-08	0.42766818113153	0.408	0.38	0.000478441037583374	NK_cells	ARID4B
6.0511198499279e-08	0.496947362067791	0.353	0.339	0.00148494481117231	NK_cells	SERBP1
7.08603217505782e-08	0.464314615522345	0.338	0.312	0.00173891229575919	NK_cells	BPTF
1.51622061128107e-07	0.346016310444463	0.39	0.372	0.00372080538008375	NK_cells	CLK1
2.22750647248912e-07	0.484733951764922	0.36	0.349	0.00546630088348831	NK_cells	HNRNPR
2.40683145881929e-07	0.407259183882088	0.408	0.396	0.00590636439994254	NK_cells	MOB1A
2.81491288508553e-07	0.366111781530588	0.423	0.411	0.00690779621999988	NK_cells	RAD21
2.96597616130134e-07	0.461196377849049	0.309	0.282	0.00727850549983349	NK_cells	NIPBL
3.80324540880933e-07	0.458369653832546	0.305	0.278	0.00933316423321809	NK_cells	RPS6KA3
6.30540686845894e-07	0.462846938576621	0.411	0.407	0.0154734684551982	NK_cells	XRCC5
6.56018935103278e-07	0.332843009560515	0.514	0.526	0.0160987046674345	NK_cells	HNRNPK
1.38604621492862e-06	0.578740873107014	0.25	0.231	0.0340135741143484	NK_cells	SCP2
1.41337861745845e-06	0.390037051248553	0.335	0.315	0.0346843112724304	NK_cells	LSM14A
1.83814990583925e-06	0.39951387285033	0.431	0.433	0.0451081986892953	NK_cells	SRSF3
2.43387488061369e-06	0.48680232139289	0.259	0.234	0.05972728957026	NK_cells	FGFR1OP2
2.98096749602951e-06	0.318611249460284	0.304	0.27	0.0731529423525641	NK_cells	CYTIP
3.25616355215253e-06	0.25515227047126	0.445	0.442	0.079906253569823	NK_cells	RPS27AP16
5.59370242252772e-06	0.523053630739626	0.326	0.317	0.13726945744883	NK_cells	ENSA
5.62007076506776e-06	0.411337217365215	0.392	0.397	0.137916536574763	NK_cells	HNRNPD
7.44775268116611e-06	0.349715662325724	0.29	0.26	0.182767850795816	NK_cells	HMGB2
8.80053275695901e-06	0.54586927571751	0.291	0.273	0.215965073855774	NK_cells	SLTM
8.84499209132388e-06	0.428035957679397	0.368	0.36	0.217056105921088	NK_cells	ATRX
1.19148722999336e-05	0.421193042900051	0.266	0.244	0.29239096624037	NK_cells	PPP4R3B
1.19671590243923e-05	0.474341781482775	0.251	0.227	0.293674082458587	NK_cells	PRPF4B
1.26873488901576e-05	0.507813637014217	0.279	0.264	0.311347541764467	NK_cells	ITGB1
1.38193503192162e-05	0.387979242806306	0.341	0.325	0.339126856833565	NK_cells	AKAP13
1.44726835019047e-05	0.315064517005656	0.34	0.321	0.355159653136742	NK_cells	SEPT9
1.65581287679833e-05	0.254666568405854	0.5	0.498	0.406336479966311	NK_cells	PPIA
1.88002081274234e-05	0.440942694841719	0.255	0.231	0.46135710744697	NK_cells	KMT2C
5.70868445655754e-05	0.324184545131108	0.4	0.401	1	NK_cells	COMMD6
6.20600403253047e-05	0.384531588789648	0.318	0.309	1	NK_cells	HNRNPM
7.52305166048828e-05	0.37453387652129	0.423	0.435	1	NK_cells	WAC
8.27896236917725e-05	0.46485954365116	0.338	0.332	1	NK_cells	PNN
8.71124607818068e-05	0.308763668981974	0.384	0.372	1	NK_cells	IDS
9.79108028233416e-05	0.393855200017962	0.252	0.231	1	NK_cells	VPS13C
0.000132445014671693	0.268947220801889	0.559	0.601	1	NK_cells	DDX17
0.000176451714957544	0.321682948499019	0.274	0.256	1	NK_cells	ZC3HAV1
0.000191865462558343	0.388211482069725	0.377	0.377	1	NK_cells	NUCKS1
0.000193424393255663	0.537295634456873	0.251	0.238	1	NK_cells	ZC3H13
0.000230670363348418	0.378703601165785	0.302	0.289	1	NK_cells	CAB39
0.000237701656438742	0.36132904889589	0.408	0.415	1	NK_cells	RBM25
0.000240718150426734	0.38696967091722	0.279	0.263	1	NK_cells	RBMS1
0.00038218287230145	0.305392750013677	0.419	0.418	1	NK_cells	IFI16
0.00042925352634306	0.403974257045426	0.316	0.314	1	NK_cells	HNRNPF
0.00049595183577284	0.286599803174114	0.252	0.229	1	NK_cells	DOCK8
0.000524109335510654	0.256296536034196	0.283	0.263	1	NK_cells	CYLD
0.000657616526884954	0.40348185920954	0.286	0.278	1	NK_cells	ARID1A
0.00114276135191117	0.540763577619428	0.353	0.356	1	NK_cells	HSPA1B
0.00115405679468664	0.450661944535858	0.264	0.252	1	NK_cells	GCC2
0.00168770526847765	0.387626632641569	0.328	0.332	1	NK_cells	TGOLN2
0.00235041743600188	0.289409803602576	0.338	0.339	1	NK_cells	SRRM1
0.00372189335824792	0.373003911556477	0.316	0.313	1	NK_cells	B4GALT1
0.00372871186474943	0.344732854404273	0.394	0.415	1	NK_cells	RBM3
0.00494369575912298	0.278437714490242	0.477	0.509	1	NK_cells	GNB1
0.00508444068414729	0.385709653893548	0.255	0.25	1	NK_cells	OIP5-AS1
0.00586758611105016	0.322975525796083	0.4	0.421	1	NK_cells	MATR3
0.00917290517746092	0.302043292407982	0.314	0.313	1	NK_cells	IER5
0.00930557614097125	0.434628258302412	0.272	0.274	1	NK_cells	LUC7L3
0.00945526201125423	0.369390723109185	0.26	0.257	1	NK_cells	NR3C1
0	7.39337737074144	0.991	0.182	0	Fibroblasts	COL3A1
0	6.97077249091461	0.996	0.26	0	Fibroblasts	COL1A2
0	6.91181300579017	0.986	0.315	0	Fibroblasts	COL1A1
0	5.33573596788622	0.904	0.033	0	Fibroblasts	LUM
0	5.21294021865366	0.949	0.069	0	Fibroblasts	DCN
0	5.07630376734715	0.998	0.253	0	Fibroblasts	SPARC
0	4.94102199085379	0.853	0.03	0	Fibroblasts	COL12A1
0	4.77362517015805	0.948	0.049	0	Fibroblasts	COL5A2
0	4.70253027094447	0.945	0.041	0	Fibroblasts	C1S
0	4.54919873433574	0.964	0.085	0	Fibroblasts	COL6A1
0	4.47075684234938	0.917	0.023	0	Fibroblasts	COL6A3
0	4.38436019050467	0.447	0.025	0	Fibroblasts	SFRP4
0	4.32175917778854	0.93	0.046	0	Fibroblasts	C1R
0	4.24831546601866	0.835	0.074	0	Fibroblasts	VCAN
0	4.22045820633498	0.688	0.053	0	Fibroblasts	IGFBP5
0	4.12304678305034	0.879	0.02	0	Fibroblasts	COL14A1
0	4.0749939630316	0.833	0.173	0	Fibroblasts	MMP2
0	4.06994682310645	0.795	0.08	0	Fibroblasts	CXCL12
0	4.01024197994313	0.669	0.019	0	Fibroblasts	ASPN
0	3.99447065553954	0.955	0.076	0	Fibroblasts	CALD1
0	3.9691242920206	0.886	0.044	0	Fibroblasts	COL5A1
0	3.92639198712277	0.728	0.04	0	Fibroblasts	POSTN
0	3.91216004741161	0.572	0.026	0	Fibroblasts	COL11A1
0	3.87592256335864	0.879	0.037	0	Fibroblasts	CTSK
0	3.67799981701727	0.928	0.009	0	Fibroblasts	PRRX1
0	3.63798849951435	0.838	0.023	0	Fibroblasts	MXRA5
0	3.55032284726545	0.964	0.165	0	Fibroblasts	TIMP2
0	3.40752931518699	0.882	0.02	0	Fibroblasts	FN1
0	3.39581351573318	0.761	0.014	0	Fibroblasts	THBS2
0	3.2619486507891	0.931	0.15	0	Fibroblasts	IGFBP4
0	3.25853561222023	0.488	0.011	0	Fibroblasts	OGN
0	3.23072672155701	0.926	0.085	0	Fibroblasts	FSTL1
0	3.14622336946097	0.463	0.021	0	Fibroblasts	CXCL14
0	3.13607312063648	0.719	0.021	0	Fibroblasts	FBLN1
0	3.05661345909277	0.766	0.084	0	Fibroblasts	COL6A2
0	3.04374283751246	0.791	0.012	0	Fibroblasts	FMOD
0	3.02961066429348	0.718	0.022	0	Fibroblasts	PCOLCE
0	3.01594408906589	0.689	0.021	0	Fibroblasts	BGN
0	2.99678750425826	0.655	0.016	0	Fibroblasts	WNT5A
0	2.98317913565393	0.824	0.022	0	Fibroblasts	OLFML2B
0	2.96449749518463	0.839	0.055	0	Fibroblasts	FBN1
0	2.95325788642886	0.644	0.005	0	Fibroblasts	OMD
0	2.94961059721771	0.636	0.009	0	Fibroblasts	EGFL6
0	2.89311549021492	0.327	0.017	0	Fibroblasts	CXCL13
0	2.8448791809065	0.798	0.045	0	Fibroblasts	SERPING1
0	2.81216068182465	0.797	0.087	0	Fibroblasts	HTRA1
0	2.79804090944794	0.766	0.025	0	Fibroblasts	AEBP1
0	2.79348226878687	0.823	0.015	0	Fibroblasts	ANTXR1
0	2.7837148587427	0.506	0.005	0	Fibroblasts	SFRP2
0	2.75165175933969	0.853	0.055	0	Fibroblasts	SERPINF1
0	2.65767651583765	0.519	0.018	0	Fibroblasts	NOTCH3
0	2.58972865035056	0.789	0.027	0	Fibroblasts	CRISPLD2
0	2.56168302429873	0.71	0.029	0	Fibroblasts	CCDC80
0	2.54491839953276	0.602	0.051	0	Fibroblasts	CYR61
0	2.54413811439362	0.823	0.053	0	Fibroblasts	NID1
0	2.53385469957298	0.788	0.045	0	Fibroblasts	PALLD
0	2.5290502477071	0.731	0.035	0	Fibroblasts	THY1
0	2.52383282997315	0.879	0.088	0	Fibroblasts	SERPINH1
0	2.50968302963939	0.845	0.128	0	Fibroblasts	PRSS23
0	2.50440173907907	0.544	0.04	0	Fibroblasts	APCDD1
0	2.49054519114564	0.77	0.016	0	Fibroblasts	SDC2
0	2.44951478705083	0.785	0.061	0	Fibroblasts	LAMA4
0	2.42764497101185	0.636	0.047	0	Fibroblasts	PLPP3
0	2.42741511601539	0.499	0.014	0	Fibroblasts	SOD3
0	2.42545169930796	0.439	0.007	0	Fibroblasts	PRELP
0	2.41202238211182	0.767	0.015	0	Fibroblasts	CDH11
0	2.36536881669246	0.566	0.01	0	Fibroblasts	GAS1
0	2.36057806299241	0.774	0.083	0	Fibroblasts	CFH
0	2.34899937557561	0.735	0.017	0	Fibroblasts	DDR2
0	2.31633516816523	0.756	0.045	0	Fibroblasts	LGALS3BP
0	2.30764942554128	0.697	0.008	0	Fibroblasts	ADAMTS2
0	2.3076350173484	0.616	0.035	0	Fibroblasts	CTHRC1
0	2.30018117444878	0.634	0.047	0	Fibroblasts	MYLK
0	2.2754954622746	0.647	0.011	0	Fibroblasts	OLFML3
0	2.27099046155961	0.525	0.075	0	Fibroblasts	NR2F2
0	2.25027784054864	0.703	0.007	0	Fibroblasts	MXRA8
0	2.24368943216123	0.608	0.004	0	Fibroblasts	PDGFRA
0	2.24242126742661	0.576	0.068	0	Fibroblasts	TIMP3
0	2.22957246373403	0.64	0.044	0	Fibroblasts	FILIP1L
0	2.22308676151464	0.475	0.005	0	Fibroblasts	PTN
0	2.19557701507351	0.529	0.007	0	Fibroblasts	FRZB
0	2.1786108181997	0.572	0.102	0	Fibroblasts	COL4A1
0	2.17136616029643	0.614	0.007	0	Fibroblasts	ISLR
0	2.16295425806568	0.406	0.006	0	Fibroblasts	DIO2
0	2.16267394398514	0.548	0.053	0	Fibroblasts	MDK
0	2.15920996090239	0.506	0.04	0	Fibroblasts	CTGF
0	2.14025676465632	0.475	0.02	0	Fibroblasts	MYL9
0	2.12544748015739	0.849	0.178	0	Fibroblasts	CALU
0	2.11679659292975	0.466	0.057	0	Fibroblasts	MGP
0	2.10325184373872	0.804	0.109	0	Fibroblasts	SPATS2L
0	2.09839	0.776	0.078	0	Fibroblasts	LAMC1
0	2.07913408433554	0.588	0.032	0	Fibroblasts	ADAM12
0	2.07430754674774	0.704	0.034	0	Fibroblasts	CYBRD1
0	2.05185657444752	0.404	0.014	0	Fibroblasts	APOD
0	2.04951366067083	0.472	0.025	0	Fibroblasts	C3
0	2.04829322497538	0.622	0.04	0	Fibroblasts	LOXL2
0	2.04065139473728	0.559	0.038	0	Fibroblasts	EDIL3
0	2.03378908406044	0.691	0.046	0	Fibroblasts	ENAH
0	2.03041107879086	0.546	0.02	0	Fibroblasts	FBLN2
0	2.00508073301729	0.941	0.284	0	Fibroblasts	LAPTM4A
0	1.99702699714656	0.828	0.305	0	Fibroblasts	EGR1
0	1.99613374115644	0.598	0.105	0	Fibroblasts	COL4A2
0	1.98885249158639	0.581	0.056	0	Fibroblasts	MMP14
0	1.98511315917721	0.605	0.036	0	Fibroblasts	LHFPL6
0	1.98213303337769	0.381	0.002	0	Fibroblasts	SCARA5
0	1.97997681154748	0.654	0.015	0	Fibroblasts	GPNMB
0	1.97739619846244	0.475	0.003	0	Fibroblasts	CPE
0	1.97643187564165	0.622	0.025	0	Fibroblasts	MSX1
0	1.97503565156574	0.852	0.109	0	Fibroblasts	CNN3
0	1.96725272873055	0.82	0.226	0	Fibroblasts	LGALS1
0	1.96174305699153	0.5	0.079	0	Fibroblasts	UACA
0	1.95937760219705	0.59	0.05	0	Fibroblasts	MAP1B
0	1.92689550267174	0.666	0.016	0	Fibroblasts	ITGB5
0	1.92274638214256	0.672	0.078	0	Fibroblasts	PMEPA1
0	1.91723365691422	0.556	0.004	0	Fibroblasts	PTGFR
0	1.88051530140598	0.597	0.032	0	Fibroblasts	LRP1
0	1.87341742077701	0.437	0.006	0	Fibroblasts	EFEMP1
0	1.86440547581972	0.682	0.05	0	Fibroblasts	SH3PXD2A
0	1.86390734002316	0.701	0.092	0	Fibroblasts	RCN1
0	1.85958970657107	0.5	0.036	0	Fibroblasts	NBL1
0	1.85543012772965	0.731	0.089	0	Fibroblasts	LAMB1
0	1.84125876286401	0.541	0.007	0	Fibroblasts	CREB3L1
0	1.84089185078269	0.534	0.019	0	Fibroblasts	LTBP1
0	1.83092623665448	0.515	0.055	0	Fibroblasts	MYO1B
0	1.8296847761963	0.537	0.009	0	Fibroblasts	HMCN1
0	1.8288700352066	0.327	0.038	0	Fibroblasts	LEPR
0	1.82075903791167	0.621	0.005	0	Fibroblasts	PDGFRB
0	1.81762623266308	0.484	0.012	0	Fibroblasts	CPXM1
0	1.80854487494055	0.666	0.034	0	Fibroblasts	FKBP10
0	1.79544498848931	0.484	0.003	0	Fibroblasts	LRRC15
0	1.78053453159957	0.581	0.008	0	Fibroblasts	LOX
0	1.7613907199035	0.453	0.006	0	Fibroblasts	GPM6B
0	1.76030328436861	0.462	0.003	0	Fibroblasts	SEMA5A
0	1.74604062863956	0.543	0.029	0	Fibroblasts	AKAP12
0	1.74577888843814	0.543	0.022	0	Fibroblasts	CRABP2
0	1.72688733554781	0.426	0.001	0	Fibroblasts	EDNRA
0	1.72667046628044	0.491	0.001	0	Fibroblasts	ENPEP
0	1.72129618314246	0.667	0.055	0	Fibroblasts	DST
0	1.71629862642153	0.588	0.003	0	Fibroblasts	ECM2
0	1.71568559117061	0.966	0.395	0	Fibroblasts	CD63
0	1.71070576724275	0.861	0.136	0	Fibroblasts	CAVIN1
0	1.7054350613293	0.396	0.002	0	Fibroblasts	SMOC2
0	1.70239615185327	0.52	0.021	0	Fibroblasts	TPM1
0	1.69681606042278	0.603	0.023	0	Fibroblasts	PLOD2
0	1.69618306464729	0.665	0.045	0	Fibroblasts	EPB41L2
0	1.66294350739916	0.584	0.019	0	Fibroblasts	KANK2
0	1.6522236881163	0.492	0.025	0	Fibroblasts	LTBP2
0	1.65033886305755	0.78	0.179	0	Fibroblasts	RAB31
0	1.64722794391813	0.654	0.177	0	Fibroblasts	GSN
0	1.64329962247093	0.81	0.136	0	Fibroblasts	IGFBP7
0	1.64087283438367	0.447	0.003	0	Fibroblasts	MFAP4
0	1.63727812496284	0.602	0.062	0	Fibroblasts	MAP3K20
0	1.63537320110465	0.549	0.025	0	Fibroblasts	CHN1
0	1.62971714093384	0.633	0.071	0	Fibroblasts	PXDN
0	1.62942521410044	0.933	0.207	0	Fibroblasts	APP
0	1.6277438077388	0.551	0.042	0	Fibroblasts	FGFR1
0	1.62090224620238	0.472	0.022	0	Fibroblasts	CLEC11A
0	1.62006230946271	0.384	0.021	0	Fibroblasts	CYP1B1
0	1.61000575792207	0.59	0.012	0	Fibroblasts	NDN
0	1.59425393837224	0.374	0.015	0	Fibroblasts	C1QTNF1
0	1.58714700832474	0.709	0.093	0	Fibroblasts	PMP22
0	1.58700498671199	0.597	0.026	0	Fibroblasts	GPX8
0	1.58603790175756	0.664	0.066	0	Fibroblasts	FKBP9
0	1.57218008808783	0.399	0.007	0	Fibroblasts	GUCY1A3
0	1.56237509023624	0.518	0.004	0	Fibroblasts	PDGFRL
0	1.55583599589114	0.45	0.005	0	Fibroblasts	ID4
0	1.54763675762956	0.577	0.041	0	Fibroblasts	LAMB2
0	1.53490336231882	0.435	0.008	0	Fibroblasts	INHBA
0	1.53373978945122	0.47	0.01	0	Fibroblasts	COL5A3
0	1.53286712135621	0.5	0.005	0	Fibroblasts	CD248
0	1.52604850021264	0.43	0.003	0	Fibroblasts	TMEM119
0	1.52401768917663	0.506	0.007	0	Fibroblasts	SPON1
0	1.51929387306182	0.754	0.15	0	Fibroblasts	SCARB2
0	1.51135107027585	0.475	0.041	0	Fibroblasts	EBF1
0	1.50960327089672	0.603	0.026	0	Fibroblasts	GLT8D2
0	1.49740662297963	0.665	0.118	0	Fibroblasts	SEPT11
0	1.48703609879962	0.558	0.109	0	Fibroblasts	EPAS1
0	1.48520630841109	0.425	0.037	0	Fibroblasts	TNS1
0	1.48516233471725	0.466	0.049	0	Fibroblasts	CPXM2
0	1.48306682897202	0.478	0.019	0	Fibroblasts	NFIX
0	1.47665278349108	0.468	0.031	0	Fibroblasts	TFPI
0	1.47425658465943	0.544	0.013	0	Fibroblasts	DKK3
0	1.47139353661227	0.467	0.012	0	Fibroblasts	VSTM4
0	1.46746329124747	0.566	0.04	0	Fibroblasts	FHL1
0	1.46215362172917	0.562	0.051	0	Fibroblasts	TMEM176A
0	1.46140433907561	0.771	0.199	0	Fibroblasts	KDELR2
0	1.46067769596545	0.538	0.053	0	Fibroblasts	NREP
0	1.45536397227452	0.403	0.007	0	Fibroblasts	THSD4
0	1.45449355304313	0.256	0.005	0	Fibroblasts	SYNPO2
0	1.45443923393328	0.525	0.016	0	Fibroblasts	FRMD6
0	1.45396779604967	0.553	0.028	0	Fibroblasts	RHOBTB3
0	1.4493539341303	0.907	0.33	0	Fibroblasts	ANXA5
0	1.44587145107829	0.312	0.001	0	Fibroblasts	GREM1
0	1.44421213533947	0.574	0.054	0	Fibroblasts	DPYSL3
0	1.44176318087789	0.477	0.029	0	Fibroblasts	ANGPTL2
0	1.43897408254463	0.544	0.034	0	Fibroblasts	PLEKHA5
0	1.41432454791868	0.821	0.217	0	Fibroblasts	CRTAP
0	1.40938733267848	0.485	0.03	0	Fibroblasts	TPM2
0	1.4024556984656	0.561	0.059	0	Fibroblasts	EHD2
0	1.39877201649844	0.333	0.022	0	Fibroblasts	SFRP1
0	1.39517870243904	0.587	0.052	0	Fibroblasts	RBFOX2
0	1.38886557159168	0.48	0.037	0	Fibroblasts	NNMT
0	1.38679166650591	0.284	0.039	0	Fibroblasts	PTGDS
0	1.38535310912922	0.483	0.002	0	Fibroblasts	PCDH18
0	1.38060347211544	0.524	0.004	0	Fibroblasts	SGCE
0	1.37685645635185	0.691	0.134	0	Fibroblasts	EMP1
0	1.37301687105859	0.478	0.005	0	Fibroblasts	CLMP
0	1.37174350510954	0.632	0.082	0	Fibroblasts	PLS3
0	1.36980613166583	0.509	0.017	0	Fibroblasts	FBLN5
0	1.36671030868339	0.646	0.101	0	Fibroblasts	MAGED1
0	1.3666294675652	0.265	0.018	0	Fibroblasts	GJC1
0	1.36556445866743	0.469	0.001	0	Fibroblasts	PRKG1
0	1.36394388400546	0.603	0.062	0	Fibroblasts	GNG12
0	1.35535990816378	0.368	0.047	0	Fibroblasts	EPS8
0	1.35408530349815	0.301	0.037	0	Fibroblasts	OLFML2A
0	1.35270038537033	0.822	0.264	0	Fibroblasts	SEC31A
0	1.35079465590621	0.539	0.006	0	Fibroblasts	TMEM98
0	1.34796145337179	0.399	0.005	0	Fibroblasts	STEAP1
0	1.34699360044453	0.509	0.016	0	Fibroblasts	SSPN
0	1.33896998489032	0.377	0.004	0	Fibroblasts	RARRES2
0	1.33226158486094	0.6	0.059	0	Fibroblasts	PPIC
0	1.32317236322619	0.788	0.207	0	Fibroblasts	LEPROT
0	1.3221621283716	0.508	0.021	0	Fibroblasts	TEAD1
0	1.3203912620332	0.463	0.011	0	Fibroblasts	COL27A1
0	1.31439559114655	0.376	0.001	0	Fibroblasts	FGF7
0	1.31306346507651	0.483	0.021	0	Fibroblasts	RCN3
0	1.31004076544632	0.594	0.063	0	Fibroblasts	ITGAV
0	1.30978711884292	0.358	0.008	0	Fibroblasts	GUCY1B3
0	1.30506611815931	0.875	0.253	0	Fibroblasts	MARCKS
0	1.29218238452727	0.497	0.007	0	Fibroblasts	KIRREL1
0	1.28951244708177	0.493	0.015	0	Fibroblasts	SMARCA1
0	1.27900311995899	0.491	0.015	0	Fibroblasts	SNAI2
0	1.2627904804407	0.628	0.127	0	Fibroblasts	SLC44A1
0	1.26111298028505	0.529	0.076	0	Fibroblasts	H1F0
0	1.26024451438111	0.566	0.056	0	Fibroblasts	TCEAL9
0	1.2576081337584	0.497	0.059	0	Fibroblasts	TMEM176B
0	1.25653487807915	0.385	0.005	0	Fibroblasts	MOXD1
0	1.25608986683409	0.594	0.078	0	Fibroblasts	PAM
0	1.25357969471969	0.65	0.119	0	Fibroblasts	NFIC
0	1.25100647922111	0.588	0.087	0	Fibroblasts	GOLIM4
0	1.25072758463231	0.33	0.003	0	Fibroblasts	DPT
0	1.24488315798646	0.647	0.182	0	Fibroblasts	AHR
0	1.24465629378288	0.448	0.001	0	Fibroblasts	FOXF2
0	1.24382604203667	0.375	0.027	0	Fibroblasts	MFGE8
0	1.24325608210866	0.513	0.031	0	Fibroblasts	SGCB
0	1.24241008475079	0.585	0.075	0	Fibroblasts	PGRMC1
0	1.2413239142791	0.476	0.021	0	Fibroblasts	AXL
0	1.22915005439435	0.789	0.246	0	Fibroblasts	DSTN
0	1.22429526998548	0.43	0.002	0	Fibroblasts	LSAMP
0	1.22333249657684	0.455	0.007	0	Fibroblasts	MRC2
0	1.2191098379651	0.562	0.062	0	Fibroblasts	BEX3
0	1.21720510072779	0.578	0.054	0	Fibroblasts	TWSG1
0	1.21642	0.698	0.204	0	Fibroblasts	RRBP1
0	1.21489939153589	0.373	0.01	0	Fibroblasts	TGFB3
0	1.21376896183502	0.507	0.032	0	Fibroblasts	PARVA
0	1.21143424692481	0.435	0.036	0	Fibroblasts	FLRT2
0	1.20238642090148	0.435	0.022	0	Fibroblasts	CERCAM
0	1.19989472570078	0.447	0.001	0	Fibroblasts	BICC1
0	1.19947389440709	0.437	0.022	0	Fibroblasts	KIAA1217
0	1.19855826558462	0.93	0.353	0	Fibroblasts	ANXA2
0	1.19519047114901	0.569	0.074	0	Fibroblasts	CTSO
0	1.18500295850792	0.371	0.049	0	Fibroblasts	TNFRSF21
0	1.18219393480366	0.389	0.002	0	Fibroblasts	TWIST1
0	1.17945906177273	0.483	0.068	0	Fibroblasts	SULF2
0	1.17178550037895	0.499	0.039	0	Fibroblasts	FAM114A1
0	1.17099892534543	0.669	0.148	0	Fibroblasts	CKAP4
0	1.1667192539579	0.261	0.01	0	Fibroblasts	C11orf96
0	1.16141	0.474	0.033	0	Fibroblasts	PAPSS2
0	1.16119932097147	0.378	0.028	0	Fibroblasts	OSMR
0	1.15956917549076	0.269	0.031	0	Fibroblasts	CCL2
0	1.15888021336633	0.401	0.022	0	Fibroblasts	PLXDC1
0	1.15877633194685	0.371	0.015	0	Fibroblasts	KITLG
0	1.15117886920407	0.29	0.007	0	Fibroblasts	PRSS12
0	1.1499549910528	0.431	0.006	0	Fibroblasts	FAT1
0	1.14882527116917	0.53	0.093	0	Fibroblasts	PLXDC2
0	1.14389233340765	0.336	0.006	0	Fibroblasts	SULF1
0	1.14117762061207	0.366	0.002	0	Fibroblasts	ANGPT1
0	1.13602887766716	0.428	0.021	0	Fibroblasts	COPZ2
0	1.13587126924692	0.405	0.028	0	Fibroblasts	CAMK2N1
0	1.1309732911663	0.493	0.025	0	Fibroblasts	FKBP7
0	1.12685320322167	0.585	0.098	0	Fibroblasts	ASPH
0	1.11840538527835	0.434	0.055	0	Fibroblasts	GJA1
0	1.11707459684948	0.438	0.011	0	Fibroblasts	FOXF1
0	1.11543658302888	0.417	0.009	0	Fibroblasts	PSD3
0	1.11403413783383	0.312	0.001	0	Fibroblasts	EPHA3
0	1.11322440423604	0.57	0.112	0	Fibroblasts	SOX4
0	1.1106194708867	0.655	0.129	0	Fibroblasts	RTL8C
0	1.10728276194948	0.403	0.044	0	Fibroblasts	SLC39A14
0	1.10314988533882	0.394	0.018	0	Fibroblasts	FZD1
0	1.10192622352116	0.723	0.197	0	Fibroblasts	TCF4
0	1.09845101895373	0.509	0.093	0	Fibroblasts	HCFC1R1
0	1.09358572009176	0.428	0.002	0	Fibroblasts	OLFML1
0	1.08414409734888	0.563	0.139	0	Fibroblasts	KLF9
0	1.08304791540651	0.405	0.005	0	Fibroblasts	EPDR1
0	1.08170097516494	0.472	0.041	0	Fibroblasts	FKBP14
0	1.08147598487297	0.409	0.004	0	Fibroblasts	LPAR1
0	1.07877505274312	0.474	0.03	0	Fibroblasts	MARVELD1
0	1.07767292854959	0.527	0.087	0	Fibroblasts	VCL
0	1.07379257483548	0.359	0.015	0	Fibroblasts	PCSK5
0	1.0670327242902	0.499	0.043	0	Fibroblasts	KDELC2
0	1.06410585169663	0.286	0.001	0	Fibroblasts	WNT2
0	1.06105199779799	0.445	0.033	0	Fibroblasts	PTGFRN
0	1.05293443739748	0.428	0.011	0	Fibroblasts	EFEMP2
0	1.05231728162673	0.466	0.065	0	Fibroblasts	IL1R1
0	1.04749923708363	0.375	0.06	0	Fibroblasts	THBS1
0	1.04488586703787	0.416	0.02	0	Fibroblasts	NLGN2
0	1.04389857338518	0.454	0.044	0	Fibroblasts	FERMT2
0	1.04194362315488	0.384	0.006	0	Fibroblasts	TBX3
0	1.03685514604649	0.544	0.078	0	Fibroblasts	PLOD1
0	1.03481558595184	0.315	0.001	0	Fibroblasts	RORB
0	1.02545244946765	0.366	0.018	0	Fibroblasts	ZNF503
0	1.0244076627748	0.478	0.081	0	Fibroblasts	OAF
0	1.02405575416939	0.431	0.022	0	Fibroblasts	ZCCHC24
0	1.02225862836823	0.4	0.022	0	Fibroblasts	TMEM47
0	1.01087297002229	0.39	0.005	0	Fibroblasts	GXYLT2
0	1.00829927180572	0.251	0.001	0	Fibroblasts	SLC7A2
0	1.0071865794219	0.475	0.053	0	Fibroblasts	SPON2
0	0.999442415509454	0.428	0.026	0	Fibroblasts	SH3PXD2B
0	0.995120798522185	0.393	0.002	0	Fibroblasts	IGDCC4
0	0.994561254195796	0.362	0.009	0	Fibroblasts	EGFR
0	0.993266965756588	0.284	0.007	0	Fibroblasts	COLEC12
0	0.992106460897221	0.415	0.029	0	Fibroblasts	TMEM45A
0	0.988897295530327	0.328	0.002	0	Fibroblasts	SLIT3
0	0.987350863450044	0.372	0.003	0	Fibroblasts	LOXL1
0	0.987138058325668	0.608	0.135	0	Fibroblasts	LIMA1
0	0.986947627172951	0.41	0.039	0	Fibroblasts	PHLDB2
0	0.982832335882322	0.413	0.024	0	Fibroblasts	BMP1
0	0.982401728349048	0.374	0.004	0	Fibroblasts	NFATC4
0	0.982071766779386	0.75	0.233	0	Fibroblasts	ITGB1
0	0.978468143914379	0.514	0.073	0	Fibroblasts	MYOF
0	0.978445430656082	0.356	0.025	0	Fibroblasts	PDGFD
0	0.976889017968745	0.307	0.01	0	Fibroblasts	FBLIM1
0	0.97450469266941	0.406	0.027	0	Fibroblasts	ROBO1
0	0.973741778460752	0.359	0.017	0	Fibroblasts	FHL2
0	0.97292479026631	0.636	0.154	0	Fibroblasts	MAP4
0	0.972316749691112	0.322	0.009	0	Fibroblasts	PDPN
0	0.971791747400519	0.265	0.008	0	Fibroblasts	CYGB
0	0.970268023975705	0.273	0.001	0	Fibroblasts	COL8A1
0	0.970110446144752	0.755	0.21	0	Fibroblasts	CD59
0	0.969439837065887	0.265	0.017	0	Fibroblasts	GGT5
0	0.96677382786423	0.336	0.001	0	Fibroblasts	VGLL3
0	0.964040111086393	0.649	0.155	0	Fibroblasts	OAT
0	0.961663923472072	0.295	0.01	0	Fibroblasts	MRVI1
0	0.957476236713793	0.414	0.044	0	Fibroblasts	SLC40A1
0	0.957456638128255	0.357	0.012	0	Fibroblasts	CTDSPL
0	0.954987268544887	0.37	0.019	0	Fibroblasts	C1QTNF6
0	0.951855254762299	0.327	0.001	0	Fibroblasts	SVEP1
0	0.948412528992218	0.338	0.013	0	Fibroblasts	STARD13
0	0.944377416380571	0.253	0.002	0	Fibroblasts	FNDC1
0	0.941350858436615	0.635	0.161	0	Fibroblasts	DPYSL2
0	0.934766671530925	0.359	0.003	0	Fibroblasts	COL16A1
0	0.929715423552441	0.4	0.052	0	Fibroblasts	PEAK1
0	0.926285301291962	0.397	0.032	0	Fibroblasts	KREMEN1
0	0.923925363393927	0.401	0.026	0	Fibroblasts	TPBG
0	0.922596856386292	0.347	0.002	0	Fibroblasts	TWIST2
0	0.921435191060561	0.361	0.004	0	Fibroblasts	GLI3
0	0.921208434415075	0.253	0.001	0	Fibroblasts	TSPAN11
0	0.919377218903935	0.43	0.062	0	Fibroblasts	ADAM9
0	0.916408148888768	0.396	0.039	0	Fibroblasts	MSRB3
0	0.911961019067464	0.61	0.137	0	Fibroblasts	SLC39A7
0	0.909561779546489	0.318	0.016	0	Fibroblasts	RND3
0	0.898466644765369	0.26	0.001	0	Fibroblasts	PRSS35
0	0.894800822191908	0.525	0.098	0	Fibroblasts	DAB2
0	0.89295660811629	0.737	0.235	0	Fibroblasts	LGALS3
0	0.892790798485111	0.39	0.033	0	Fibroblasts	YAP1
0	0.884225145985956	0.412	0.042	0	Fibroblasts	RARG
0	0.879824660247217	0.323	0.025	0	Fibroblasts	GNAI1
0	0.872288468663427	0.347	0.004	0	Fibroblasts	SATB2
0	0.872277482018282	0.487	0.077	0	Fibroblasts	P4HA1
0	0.871309617713892	0.285	0.006	0	Fibroblasts	HTRA3
0	0.870077164879023	0.425	0.053	0	Fibroblasts	TRPS1
0	0.868056860297722	0.414	0.046	0	Fibroblasts	CD276
0	0.867549245700686	0.462	0.077	0	Fibroblasts	ZBTB20
0	0.86323590581102	0.38	0.033	0	Fibroblasts	MYH10
0	0.863009900926162	0.387	0.037	0	Fibroblasts	SEPT8
0	0.862663534735565	0.277	0.008	0	Fibroblasts	NEGR1
0	0.859058388673066	0.308	0.026	0	Fibroblasts	VCAM1
0	0.858253877897595	0.283	0.002	0	Fibroblasts	ADAM33
0	0.85694330364139	0.467	0.07	0	Fibroblasts	MPZL1
0	0.856827445565712	0.454	0.093	0	Fibroblasts	RHOQ
0	0.847491053990679	0.565	0.125	0	Fibroblasts	TSC22D1
0	0.844545395225081	0.398	0.072	0	Fibroblasts	TGFBI
0	0.844424135975019	0.381	0.014	0	Fibroblasts	TPST1
0	0.841653482631418	0.325	0.005	0	Fibroblasts	SLC2A10
0	0.84162943573932	0.312	0.017	0	Fibroblasts	FAM20C
0	0.84150183379371	0.346	0.051	0	Fibroblasts	NRP2
0	0.840950541441476	0.299	0.01	0	Fibroblasts	SYDE1
0	0.839316887542614	0.301	0.006	0	Fibroblasts	TFAP2C
0	0.834766537069231	0.38	0.043	0	Fibroblasts	CDC42BPA
0	0.832784513357521	0.287	0.006	0	Fibroblasts	SRPX
0	0.83214736301414	0.337	0.017	0	Fibroblasts	MAP1A
0	0.831331077474315	0.327	0.005	0	Fibroblasts	GPR176
0	0.829714200336686	0.513	0.103	0	Fibroblasts	SEC24D
0	0.828110789254035	0.427	0.052	0	Fibroblasts	ECM1
0	0.827845433817259	0.353	0.038	0	Fibroblasts	CDKN1C
0	0.827226323062496	0.46	0.095	0	Fibroblasts	TCEAL4
0	0.825612055441638	0.926	0.344	0	Fibroblasts	IFITM3
0	0.824865459473822	0.464	0.091	0	Fibroblasts	PCYOX1
0	0.82477408668611	0.315	0.014	0	Fibroblasts	TSKU
0	0.820437679733939	0.304	0.009	0	Fibroblasts	VASN
0	0.819497641055699	0.32	0.017	0	Fibroblasts	MID1
0	0.8165747476682	0.347	0.026	0	Fibroblasts	SH3D19
0	0.815921105871562	0.334	0.033	0	Fibroblasts	MAGI2-AS3
0	0.813101218801765	0.274	0.026	0	Fibroblasts	RCAN2
0	0.812243109394961	0.29	0.018	0	Fibroblasts	HNMT
0	0.809973820976392	0.342	0.01	0	Fibroblasts	PFN2
0	0.805994730447097	0.296	0.028	0	Fibroblasts	ACKR3
0	0.805946597186706	0.504	0.114	0	Fibroblasts	MAGED2
0	0.803289606582936	0.304	0.001	0	Fibroblasts	SIX1
0	0.802901505933002	0.344	0.017	0	Fibroblasts	MMP19
0	0.801570729043496	0.283	0.013	0	Fibroblasts	FAM20A
0	0.801264498191662	0.251	0.004	0	Fibroblasts	IGF2
0	0.800187076211797	0.456	0.068	0	Fibroblasts	SLC39A6
0	0.799966514984482	0.332	0.01	0	Fibroblasts	GALNT5
0	0.798878392658959	0.371	0.059	0	Fibroblasts	ADGRL2
0	0.798157314737264	0.296	0.008	0	Fibroblasts	C2
0	0.794904464253807	0.309	0.003	0	Fibroblasts	DSEL
0	0.793223525505707	0.499	0.102	0	Fibroblasts	SNX9
0	0.787371685508914	0.308	0.024	0	Fibroblasts	AMOTL2
0	0.777501763551576	0.415	0.061	0	Fibroblasts	MXRA7
0	0.776404294642227	0.287	0.017	0	Fibroblasts	IL11RA
0	0.770729131024093	0.455	0.082	0	Fibroblasts	RAI14
0	0.769663336973686	0.641	0.169	0	Fibroblasts	ZEB2
0	0.768722898350867	0.404	0.067	0	Fibroblasts	NCKAP1
0	0.767922080386993	0.262	0.008	0	Fibroblasts	COL8A2
0	0.766513617416441	0.509	0.095	0	Fibroblasts	SEC23A
0	0.762376756537443	0.45	0.069	0	Fibroblasts	CTTN
0	0.762345339624998	0.343	0.016	0	Fibroblasts	KDELR3
0	0.757027881821656	0.43	0.065	0	Fibroblasts	GOLM1
0	0.751497892580771	0.274	0.001	0	Fibroblasts	DZIP1
0	0.743199638574318	0.308	0.022	0	Fibroblasts	GEM
0	0.741616276388224	0.45	0.064	0	Fibroblasts	CPQ
0	0.739184229210412	0.343	0.046	0	Fibroblasts	PBX1
0	0.736977201649595	0.265	0.021	0	Fibroblasts	UNC5B
0	0.731604164749045	0.319	0.028	0	Fibroblasts	MCC
0	0.727815882659551	0.278	0.023	0	Fibroblasts	SAMD5
0	0.727706208971415	0.327	0.045	0	Fibroblasts	ITPRIPL2
0	0.725556852568827	0.291	0.003	0	Fibroblasts	KIF26B
0	0.717654566163754	0.497	0.11	0	Fibroblasts	HGSNAT
0	0.71711215605752	0.316	0.025	0	Fibroblasts	APBB2
0	0.716588206045879	0.271	0.004	0	Fibroblasts	SNCAIP
0	0.7157942737748	0.394	0.053	0	Fibroblasts	MME
0	0.714305460477269	0.286	0.014	0	Fibroblasts	RUNX1T1
0	0.713740043361344	0.29	0.014	0	Fibroblasts	PLSCR4
0	0.706587026379522	0.307	0.02	0	Fibroblasts	FZD3
0	0.704991821249429	0.403	0.064	0	Fibroblasts	ABL1
0	0.702802934706585	0.357	0.054	0	Fibroblasts	FAM46A
0	0.69932458883387	0.289	0.031	0	Fibroblasts	PAWR
0	0.696697274697629	0.38	0.041	0	Fibroblasts	CHST14
0	0.684769713772755	0.398	0.072	0	Fibroblasts	TRAM2
0	0.684237424273291	0.503	0.112	0	Fibroblasts	SPIN1
0	0.68086995027073	0.256	0.001	0	Fibroblasts	ITGA11
0	0.680820135322568	0.311	0.029	0	Fibroblasts	OSBPL1A
0	0.680796649183701	0.261	0.021	0	Fibroblasts	PID1
0	0.679309901954005	0.359	0.043	0	Fibroblasts	GPX7
0	0.679206021614341	0.252	0.014	0	Fibroblasts	SDC3
0	0.676452455217909	0.413	0.082	0	Fibroblasts	GINM1
0	0.672579244255917	0.37	0.048	0	Fibroblasts	PKD2
0	0.671081407137096	0.322	0.024	0	Fibroblasts	PLTP
0	0.668949844840432	0.265	0.004	0	Fibroblasts	OLFM2
0	0.664504343559124	0.359	0.053	0	Fibroblasts	EXT1
0	0.657168438227611	0.268	0.022	0	Fibroblasts	CRISPLD1
0	0.647318171148317	0.411	0.071	0	Fibroblasts	WWTR1
0	0.645517376425346	0.299	0.01	0	Fibroblasts	PTK7
0	0.643944637947271	0.293	0.017	0	Fibroblasts	BACE1
0	0.642327064458037	0.409	0.063	0	Fibroblasts	C5orf15
0	0.639309706729858	0.365	0.055	0	Fibroblasts	KIFAP3
0	0.638904113817228	0.453	0.078	0	Fibroblasts	CTSL
0	0.634267374717619	0.271	0.029	0	Fibroblasts	ITSN1
0	0.632430575644587	0.268	0.004	0	Fibroblasts	PDZRN3
0	0.6281956088678	0.331	0.052	0	Fibroblasts	CAMSAP2
0	0.626876765141264	0.289	0.014	0	Fibroblasts	EXTL2
0	0.623747076222331	0.324	0.042	0	Fibroblasts	TNKS1BP1
0	0.623739910139809	0.258	0.031	0	Fibroblasts	A4GALT
0	0.620453177227301	0.372	0.039	0	Fibroblasts	WLS
0	0.616923693590449	0.26	0.011	0	Fibroblasts	SLC1A3
0	0.614992117736582	0.251	0.016	0	Fibroblasts	SGMS2
0	0.612369321467471	0.282	0.036	0	Fibroblasts	CDC42EP1
0	0.611622096902856	0.263	0.024	0	Fibroblasts	TCF7L1
0	0.610904647948321	0.28	0.014	0	Fibroblasts	P3H4
0	0.609700037823824	0.259	0.02	0	Fibroblasts	TRIM2
0	0.604435371402316	0.265	0.013	0	Fibroblasts	IRS1
0	0.604377796753448	0.265	0.016	0	Fibroblasts	ALDH1L2
0	0.603405805672282	0.299	0.035	0	Fibroblasts	PTPRK
0	0.601503224003942	0.252	0.013	0	Fibroblasts	FAT4
0	0.598849103247401	0.274	0.013	0	Fibroblasts	TUSC3
0	0.598592696882612	0.422	0.084	0	Fibroblasts	TMEM263
0	0.593823767226137	0.285	0.035	0	Fibroblasts	DOCK1
0	0.588788559131823	0.306	0.036	0	Fibroblasts	AFAP1
0	0.584886381873971	0.255	0.011	0	Fibroblasts	FEZ1
0	0.583086711649542	0.335	0.039	0	Fibroblasts	DPY19L3
0	0.581285956342697	0.293	0.031	0	Fibroblasts	JAM3
0	0.571750074112189	0.405	0.076	0	Fibroblasts	H6PD
0	0.568670023037708	0.388	0.065	0	Fibroblasts	RUNX2
0	0.568509136276942	0.368	0.053	0	Fibroblasts	TNFAIP6
0	0.566348894745472	0.271	0.021	0	Fibroblasts	GSTA4
0	0.555351064568195	0.272	0.03	0	Fibroblasts	LHFPL2
0	0.554138222228592	0.262	0.03	0	Fibroblasts	TRIP6
0	0.552576599107241	0.254	0.011	0	Fibroblasts	NEO1
0	0.550415930259757	0.268	0.03	0	Fibroblasts	RGL1
0	0.549125228536336	0.275	0.027	0	Fibroblasts	SETBP1
0	0.545710343731518	0.254	0.018	0	Fibroblasts	C1orf198
0	0.53372697062798	0.277	0.027	0	Fibroblasts	P3H1
0	0.527318583318344	0.317	0.043	0	Fibroblasts	ACVR1
0	0.514500283066255	0.268	0.034	0	Fibroblasts	TULP3
0	0.495279693203038	0.27	0.034	0	Fibroblasts	DPY19L4
0	0.49089351597338	0.264	0.03	0	Fibroblasts	CDC14B
0	0.488564247852941	0.252	0.028	0	Fibroblasts	MAN1C1
0	0.484702287386768	0.293	0.036	0	Fibroblasts	CDK14
4.72306073311016e-308	0.757914923128343	0.576	0.151	1.15903910390523e-303	Fibroblasts	TSPAN3
1.38864606663264e-306	0.705657094148202	0.428	0.088	3.40773744751651e-302	Fibroblasts	SAV1
6.29869031754353e-305	0.814653213202217	0.584	0.153	1.54569860392518e-300	Fibroblasts	ROCK2
6.32353375256916e-305	0.580414481182171	0.324	0.052	1.55179518288047e-300	Fibroblasts	PLBD2
2.76269635325608e-303	0.616606207909475	0.353	0.062	6.77965685089043e-299	Fibroblasts	AIG1
1.85753143027898e-300	0.751630246461001	0.511	0.123	4.55838212990461e-296	Fibroblasts	TCF12
3.56885606700687e-298	0.627459207533016	0.285	0.041	8.75797278843487e-294	Fibroblasts	SASH1
1.29171396189921e-297	0.475402036349966	0.266	0.035	3.16986606250066e-293	Fibroblasts	RNF144A
7.15064361025817e-296	0.631376580088663	0.34	0.059	1.75476794195736e-291	Fibroblasts	MYO1C
1.70889607908474e-295	0.985794440651518	0.996	0.73	4.19363097807395e-291	Fibroblasts	VIM
2.30517300032179e-295	1.02480161328228	0.689	0.227	5.65689454278966e-291	Fibroblasts	HDLBP
9.60398181835641e-293	0.909103862265407	0.746	0.251	2.35681713822466e-288	Fibroblasts	IL6ST
2.79874288919624e-292	0.56347336243046	0.277	0.04	6.86811505008756e-288	Fibroblasts	ZNF532
3.16440299617285e-292	1.1632450455088	0.512	0.128	7.76544495260818e-288	Fibroblasts	CAV1
4.40129882121378e-292	0.541172841723764	0.353	0.063	1.08007873072586e-287	Fibroblasts	KCTD10
3.41062239888148e-291	0.515768520846569	0.264	0.036	8.36966736685516e-287	Fibroblasts	ACO1
6.07354896795015e-291	0.590390397525284	0.306	0.048	1.49044891673497e-286	Fibroblasts	BPGM
1.29281893679583e-290	0.993591613244722	0.776	0.292	3.17257767089698e-286	Fibroblasts	ARF4
1.8621876064359e-288	0.676915112553381	0.465	0.107	4.5698083861937e-284	Fibroblasts	SLC39A1
3.02326179125195e-288	0.498792599527491	0.254	0.034	7.4190844357323e-284	Fibroblasts	TMTC3
3.06899222568951e-288	0.861263137094547	0.487	0.116	7.53130692184206e-284	Fibroblasts	LPP
1.50089287667493e-287	0.42315504759336	0.257	0.033	3.68319111936028e-283	Fibroblasts	PTPN13
1.54489177307546e-287	0.537394936537539	0.274	0.039	3.79116441112717e-283	Fibroblasts	PTPRG
1.03445444525911e-285	0.480336563943522	0.377	0.071	2.53855120866586e-281	Fibroblasts	NOTCH2
6.91362716711991e-285	0.54471545335121	0.362	0.068	1.69660410681123e-280	Fibroblasts	WASL
1.60623247661791e-284	0.75647245940149	0.591	0.169	3.94169449762036e-280	Fibroblasts	FNDC3B
1.56005288928083e-283	0.773179159487678	0.428	0.094	3.82836979029515e-279	Fibroblasts	ARHGAP1
6.04647315818186e-282	0.529756560654877	0.305	0.049	1.48380451301783e-277	Fibroblasts	TCF7L2
4.53938317922935e-281	0.620784417170762	0.352	0.066	1.11396463218288e-276	Fibroblasts	SETD7
8.42647584118525e-281	0.78270277445315	0.268	0.039	2.06785717142686e-276	Fibroblasts	MAFB
1.93264722526478e-278	0.771190262479614	0.344	0.063	4.74271629079977e-274	Fibroblasts	DLC1
9.76954784614278e-275	0.938963250303855	0.293	0.048	2.39744704144344e-270	Fibroblasts	JAG1
3.00235043842953e-274	0.606732027432302	0.263	0.038	7.36776797590607e-270	Fibroblasts	CDC42EP4
6.43898081033793e-274	0.891344314482546	0.831	0.32	1.58012589085693e-269	Fibroblasts	EID1
2.66604501437722e-273	0.897387522398891	0.769	0.28	6.5424744652817e-269	Fibroblasts	KDELR1
1.17620644997347e-272	0.608595832692952	0.4	0.085	2.88641062823489e-268	Fibroblasts	SMAD5
4.90397528130516e-272	0.473744569756227	0.299	0.049	1.20343553403229e-267	Fibroblasts	EXT2
4.47285490999009e-271	0.388662164236169	0.253	0.034	1.09763859491157e-266	Fibroblasts	DTX3
1.02733431625698e-270	0.667016926747572	0.369	0.073	2.52107841209462e-266	Fibroblasts	CD109
1.14103113792607e-270	0.550100752795171	0.37	0.073	2.80009041247058e-266	Fibroblasts	SPART
2.57976653259802e-269	0.827763484059866	0.765	0.277	6.33074707099555e-265	Fibroblasts	NORAD
3.34400580371811e-268	0.766635359957483	0.32	0.057	8.20619024232423e-264	Fibroblasts	RBPMS
4.33181464828532e-268	0.678628343849448	0.463	0.112	1.06302731468922e-263	Fibroblasts	NFE2L1
1.01825727573128e-266	0.513239506199802	0.293	0.048	2.49880335464457e-262	Fibroblasts	PXDC1
6.29009803916222e-265	0.670791232173838	0.401	0.088	1.54359005881041e-260	Fibroblasts	TMED3
1.45926533390049e-263	0.786317381864234	0.536	0.148	3.58103712939181e-259	Fibroblasts	CYB5R3
6.66670716259372e-263	0.78272	0.703	0.237	1.6360099377005e-258	Fibroblasts	CLTC
1.47444610072789e-262	0.703696285429133	0.625	0.187	3.61829073118625e-258	Fibroblasts	MGST3
1.97504712215265e-262	0.921902890708636	0.845	0.346	4.8467656377626e-258	Fibroblasts	NUCKS1
8.22377029734497e-260	0.787123961296661	0.644	0.21	2.01811323096846e-255	Fibroblasts	OSTC
1.39279901683349e-257	0.603348388493059	0.475	0.118	3.4179287873094e-253	Fibroblasts	NPTN
2.53842940784149e-254	0.686357244555528	0.588	0.175	6.22930576684301e-250	Fibroblasts	CLIC4
5.09605524323194e-250	1.19827652868683	0.304	0.056	1.25057195668912e-245	Fibroblasts	ITGA1
1.36542296222639e-249	0.56665144143477	0.439	0.107	3.35074794930357e-245	Fibroblasts	GOLGA2
4.44535393246193e-248	0.610088746617251	0.272	0.045	1.09088985502616e-243	Fibroblasts	SPRED1
4.88546452075102e-248	0.432422463063222	0.307	0.055	1.1988929933923e-243	Fibroblasts	PDE4DIP
7.0623732018322e-248	0.690152330143028	0.474	0.122	1.73310638372962e-243	Fibroblasts	ARHGEF12
1.29398596836329e-247	0.6163900077997	0.518	0.144	3.17544156636351e-243	Fibroblasts	TIMP1
3.94699902210297e-247	0.74222243971664	0.312	0.059	9.68593560024069e-243	Fibroblasts	SORBS3
6.69558834333555e-246	0.53602025559662	0.839	0.333	1.64309737945454e-241	Fibroblasts	CTSB
1.13576332172817e-245	0.659093155193526	0.591	0.177	2.78716319152093e-241	Fibroblasts	CTNNB1
8.85120984227916e-245	0.54296167666531	0.33	0.064	2.17208689529531e-240	Fibroblasts	ABI2
6.72999685820445e-244	0.548695595933032	0.276	0.047	1.65154122900337e-239	Fibroblasts	ARHGAP21
1.0484596915964e-243	0.402789661687446	0.353	0.072	2.57292008317757e-239	Fibroblasts	MAGEH1
1.46792480373301e-243	0.335197307136693	0.413	0.092	3.6022874683608e-239	Fibroblasts	ALPL
9.98122886586402e-243	0.612176323378955	0.379	0.084	2.44939356368303e-238	Fibroblasts	GNB4
5.74430281116847e-242	1.05824978699647	0.897	0.472	1.40965190986074e-237	Fibroblasts	CD99
6.2349443679062e-241	0.563914370068061	0.477	0.124	1.53005534788418e-236	Fibroblasts	RRAGA
1.13004416590692e-240	0.634587991326934	0.393	0.09	2.77312838313558e-236	Fibroblasts	RAB13
2.06703672275054e-236	0.765883265889954	0.423	0.105	5.07250811762982e-232	Fibroblasts	CSGALNACT1
3.61133597864482e-236	0.780083446384927	0.416	0.101	8.86221849159438e-232	Fibroblasts	CEBPD
7.6923171355619e-236	0.471292607024885	0.357	0.077	1.88769462506689e-231	Fibroblasts	TCEAL8
9.63971858739629e-236	0.434081653538929	0.291	0.053	2.36558694134705e-231	Fibroblasts	GLT8D1
4.96151981779196e-235	0.584305508409375	0.467	0.124	1.21755696328615e-230	Fibroblasts	ARMCX3
5.30076667464653e-235	0.89711862744566	0.839	0.357	1.30080814195826e-230	Fibroblasts	SEPT2
7.36832603018653e-235	0.626277614927715	0.441	0.112	1.80818720780777e-230	Fibroblasts	EEA1
8.1124815036303e-235	0.62418032082723	0.533	0.15	1.99080296099087e-230	Fibroblasts	CD9
9.10054117651288e-235	0.760294193835708	0.67	0.227	2.23327280471626e-230	Fibroblasts	CST3
4.01799299377861e-234	0.545279790272155	0.446	0.115	9.8601548067327e-230	Fibroblasts	ARL1
2.98936461603195e-233	0.619854264729196	0.517	0.147	7.33590076774241e-229	Fibroblasts	CTNNA1
3.72327881983095e-233	0.611195152681372	0.461	0.123	9.13692622386515e-229	Fibroblasts	CREG1
1.59076529543e-232	0.752328483688571	0.709	0.252	3.90373803498521e-228	Fibroblasts	TUBB
3.77353821776365e-231	0.609661685446381	0.434	0.11	9.26026278639199e-227	Fibroblasts	CBX6
2.80547322194531e-230	0.524628738251511	0.508	0.143	6.8846312866538e-226	Fibroblasts	IMPAD1
4.43554013782609e-230	0.943916753455805	0.712	0.268	1.08848154982252e-225	Fibroblasts	RHOB
9.69552427297761e-229	0.575963183636545	0.464	0.124	2.37928165658871e-224	Fibroblasts	IL13RA1
1.0333678544496e-228	0.529632608731998	0.341	0.073	2.53588471481932e-224	Fibroblasts	LTBR
3.36840436961412e-228	0.47780766729649	0.255	0.043	8.26606432303305e-224	Fibroblasts	SESTD1
4.14507406509786e-228	0.590885049879446	0.4	0.094	1.01720117557501e-223	Fibroblasts	NRP1
4.99043754496967e-228	0.878077041200434	0.655	0.235	1.22465337353556e-223	Fibroblasts	GALNT1
2.35910092603766e-226	0.909898682083837	0.472	0.13	5.78923367249642e-222	Fibroblasts	MT2A
1.27745158338181e-225	0.645318449919129	0.635	0.207	3.13486618561897e-221	Fibroblasts	TUBA1A
2.11923949550869e-225	0.60089272075642	0.268	0.048	5.20061372197832e-221	Fibroblasts	CCND1
4.20184685607871e-225	0.514324664678274	0.489	0.135	1.03113321848172e-220	Fibroblasts	SPAG9
9.32163944045132e-225	0.544658704102629	0.427	0.109	2.28753031868675e-220	Fibroblasts	EI24
1.84722198296204e-224	0.740489350580597	0.724	0.275	4.53308274618884e-220	Fibroblasts	RAB2A
1.03478440892856e-223	0.324283159088057	0.264	0.045	2.53936093951067e-219	Fibroblasts	CSF1
9.28656599375375e-223	0.68639702482574	0.654	0.227	2.27892329486717e-218	Fibroblasts	GLG1
1.16192507013336e-222	0.533174251874351	0.281	0.052	2.85136412210727e-218	Fibroblasts	LTBP3
1.68262421432157e-222	0.751865754047623	0.65	0.233	4.12915982194513e-218	Fibroblasts	TTC3
2.04036819500001e-222	0.478110695766035	0.467	0.124	5.00706355053002e-218	Fibroblasts	CTNND1
8.2739323931172e-221	0.526649182465041	0.393	0.096	2.03042300927096e-216	Fibroblasts	PIGT
1.22923232930071e-220	0.726324848303943	0.307	0.063	3.01653613610395e-216	Fibroblasts	EMP2
1.79294409844972e-220	0.543380334352213	0.362	0.081	4.39988481759562e-216	Fibroblasts	LAPTM4B
4.00924166720997e-220	0.529292636346603	0.281	0.053	9.83867905133326e-216	Fibroblasts	TCEAL3
1.67356455189579e-219	0.586598936837714	0.366	0.087	4.10692741035226e-215	Fibroblasts	VKORC1
8.11501496715705e-219	0.588250178494272	0.506	0.148	1.99142467294034e-214	Fibroblasts	TRIM8
1.84817438474486e-217	0.979560590716984	0.641	0.237	4.53541994016388e-213	Fibroblasts	CD81
2.5302937265778e-216	0.451529660557896	0.256	0.045	6.20934080502193e-212	Fibroblasts	ZDHHC9
4.48537653783338e-215	0.545395392459107	0.45	0.122	1.10071140238431e-210	Fibroblasts	HACD3
1.93524843333181e-214	0.555817711251861	0.366	0.087	4.74909965539627e-210	Fibroblasts	REEP3
4.37214322478508e-214	0.503386946322515	0.484	0.136	1.07292394736226e-209	Fibroblasts	TMEM43
4.91930082108276e-213	0.614754255737037	0.641	0.223	1.20719642149371e-208	Fibroblasts	SURF4
5.46754677418574e-213	0.506416861324093	0.531	0.162	1.34173597838518e-208	Fibroblasts	TMEM167A
7.02307188073602e-213	0.470066566563981	0.3	0.06	1.72346183953262e-208	Fibroblasts	SERINC5
1.49196823947288e-212	0.437752691263325	0.293	0.059	3.66129005966644e-208	Fibroblasts	LATS2
2.49152589881674e-212	0.45005474483671	0.443	0.118	6.11420455569627e-208	Fibroblasts	MIB1
5.16104040683851e-211	0.590741416942187	0.515	0.154	1.26651931583817e-206	Fibroblasts	DYNC1I2
6.13717422468539e-211	0.470586562087232	0.318	0.068	1.50606255473779e-206	Fibroblasts	ZBED1
3.84295358784235e-210	0.635167407773532	0.464	0.131	9.43060810456513e-206	Fibroblasts	KCTD12
1.28771644941373e-209	0.408996000465507	0.43	0.113	3.1600561668613e-205	Fibroblasts	CASC4
1.36950764640899e-209	0.729861099850898	0.282	0.057	3.36077176428766e-205	Fibroblasts	PTK2
8.49175260388297e-206	0.545753077779964	0.454	0.129	2.08387608899288e-201	Fibroblasts	AHCYL1
2.72993224601794e-204	0.469500533766451	0.252	0.046	6.69925373172803e-200	Fibroblasts	HEBP1
3.41814706882986e-204	0.540163390632919	0.413	0.111	8.38813290690849e-200	Fibroblasts	AK3
4.65112266924183e-204	0.69988461109585	0.632	0.226	1.14138550303194e-199	Fibroblasts	PRNP
4.37122838112127e-203	0.376037212876199	0.318	0.07	1.07269944472716e-198	Fibroblasts	LGMN
1.07465028563435e-202	0.623547362073437	0.337	0.079	2.6371918009467e-198	Fibroblasts	AC034102.1
3.02075346794143e-202	0.463900885039895	0.297	0.062	7.41292901032827e-198	Fibroblasts	FAM126A
3.82782430010594e-201	0.639441443248654	0.698	0.261	9.39348083245998e-197	Fibroblasts	ATP6AP2
1.11037342272948e-198	0.449865971534828	0.294	0.062	2.72485637937815e-194	Fibroblasts	RTL8A
1.67958895317286e-197	0.264685112262043	0.286	0.057	4.12171129108619e-193	Fibroblasts	RNF24
2.22863061554215e-197	0.38776846216796	0.384	0.097	5.46905953054045e-193	Fibroblasts	CBX1
2.81123554782048e-197	0.422309696128542	0.259	0.05	6.89877203435145e-193	Fibroblasts	MAGEF1
7.89442450107996e-195	0.427932609652795	0.296	0.064	1.93729177256502e-190	Fibroblasts	GPR107
1.04227322283024e-194	0.433958183418134	0.433	0.12	2.55773848882542e-190	Fibroblasts	ADH5
1.28686457085714e-192	0.44753141873982	0.292	0.063	3.15796565688342e-188	Fibroblasts	ARL3
2.07280242905999e-192	0.479543776411749	0.277	0.058	5.08665716091322e-188	Fibroblasts	NME4
3.76648333065432e-190	0.624335071111818	0.676	0.261	9.2429500934257e-186	Fibroblasts	LMAN1
3.97757053643819e-190	0.44432395507536	0.255	0.05	9.76095809641932e-186	Fibroblasts	JDP2
8.04638125035675e-190	0.508728404778092	0.284	0.06	1.97458195883755e-185	Fibroblasts	MYO6
1.3433713109162e-189	0.444699403868616	0.494	0.15	3.29663319698836e-185	Fibroblasts	YBX3
1.88843796688918e-188	0.626972841102917	0.774	0.318	4.63422677074604e-184	Fibroblasts	PEBP1
4.81119684099442e-188	0.398184593264468	0.4	0.109	1.18066770478003e-183	Fibroblasts	PRRC1
3.67105405206406e-187	0.497926299706257	0.562	0.191	9.00876664376519e-183	Fibroblasts	COPB2
4.6832513159651e-187	0.384263389763169	0.328	0.077	1.14926987293784e-182	Fibroblasts	RYK
7.29003391206559e-187	0.40851694996714	0.263	0.054	1.7889743220209e-182	Fibroblasts	ICMT
9.49821447610867e-187	0.380963186824202	0.375	0.096	2.33086183243707e-182	Fibroblasts	ANTXR2
4.10094747542912e-186	0.613700685938898	0.716	0.281	1.0063725104703e-181	Fibroblasts	LAMP1
3.05974498134951e-184	0.358832770210792	0.278	0.059	7.5086141842317e-180	Fibroblasts	LANCL1
1.46113069975891e-183	0.52610747897076	0.394	0.11	3.58561473720837e-179	Fibroblasts	IKBIP
1.63655048223797e-183	0.502834782375023	0.519	0.17	4.01609488341197e-179	Fibroblasts	SAR1A
1.71224231501099e-183	0.479404834696408	0.251	0.05	4.20184264103697e-179	Fibroblasts	SELENOM
1.64087417974905e-182	0.959958099429038	0.44	0.138	4.02670523710417e-178	Fibroblasts	PHLDA1
1.67391109763822e-182	0.577732380375899	0.365	0.095	4.10777783360418e-178	Fibroblasts	FAM198B
3.32721998775709e-182	0.267409429426396	0.285	0.061	8.1649978499559e-178	Fibroblasts	ARHGEF40
2.00611302566004e-181	0.520839267984758	0.393	0.11	4.92300136496975e-177	Fibroblasts	ADI1
5.70304281261766e-181	0.57875671005773	0.631	0.238	1.39952670621637e-176	Fibroblasts	COPA
2.42964727988441e-180	0.417556428077634	0.364	0.096	5.96235442483635e-176	Fibroblasts	DVL3
2.18436138895304e-179	0.513050958560667	0.346	0.09	5.36042284849077e-175	Fibroblasts	SPTSSA
7.3503253028535e-179	0.623953631649017	0.677	0.259	1.80376982932025e-174	Fibroblasts	MRFAP1
2.86295879608838e-178	0.646928676522071	0.469	0.147	7.02570088560088e-174	Fibroblasts	PDLIM5
6.57739355217481e-178	0.402793793330453	0.305	0.071	1.6140923777037e-173	Fibroblasts	SCPEP1
1.67839035616598e-176	0.399291395768849	0.358	0.093	4.11876993403131e-172	Fibroblasts	REV3L
2.3630625254375e-176	0.42941197709395	0.265	0.057	5.79895543742363e-172	Fibroblasts	SUMF1
3.69494743796452e-176	0.327170317212525	0.265	0.056	9.06740101276494e-172	Fibroblasts	TMCO3
8.79286236604833e-176	0.368102330650164	0.297	0.069	2.15776842462826e-171	Fibroblasts	ZHX1
9.58132379944134e-176	0.450017344934895	0.453	0.137	2.3512568603829e-171	Fibroblasts	ENTPD1
1.2049819374493e-175	0.428656763015805	0.262	0.055	2.95702567450059e-171	Fibroblasts	PPFIBP1
1.39204745761858e-175	0.514380501107358	0.466	0.146	3.416084460996e-171	Fibroblasts	TXNDC15
1.70679772037885e-175	0.412092735073805	0.467	0.144	4.1884816058097e-171	Fibroblasts	SPPL2A
2.43215075907199e-175	0.590302909942075	0.939	0.572	5.96849796276266e-171	Fibroblasts	PSAP
3.48155346690131e-175	0.40921727393261	0.637	0.227	8.54373220777582e-171	Fibroblasts	PEA15
4.12566290891905e-175	0.455090312650279	0.408	0.118	1.01243767784873e-170	Fibroblasts	STAT2
4.2769436458757e-175	0.387958169507021	0.307	0.073	1.0495619706979e-170	Fibroblasts	ANO6
8.67538145892091e-175	0.399067464043892	0.346	0.089	2.12893861001919e-170	Fibroblasts	PDXDC1
3.09007591663699e-174	0.404502595187985	0.42	0.124	7.58304629942717e-170	Fibroblasts	YIPF5
7.73202089514959e-174	0.366463581958114	0.29	0.066	1.89743792766971e-169	Fibroblasts	LNPK
8.5341074793966e-174	0.446300479809943	0.329	0.083	2.09426997544393e-169	Fibroblasts	C5orf24
3.80838614432207e-173	0.428179788311699	0.318	0.079	9.34577959816636e-169	Fibroblasts	PPP2CB
5.25398060592635e-173	0.52590459318776	0.317	0.078	1.28932684069433e-168	Fibroblasts	SVIL
1.54132074892093e-171	0.358765189714722	0.458	0.141	3.78240111785197e-167	Fibroblasts	MBTPS1
5.4648928663582e-171	0.742604874236575	0.365	0.1	1.3410847094043e-166	Fibroblasts	F2R
1.58295310469399e-170	0.470718778567857	0.371	0.104	3.88456691891904e-166	Fibroblasts	PSMB5
2.5046733470615e-170	0.34040951305181	0.345	0.089	6.14646839368893e-166	Fibroblasts	CAMK2D
4.40879359406911e-170	0.337670130243268	0.384	0.105	1.08191794798456e-165	Fibroblasts	SESN3
4.84068650139289e-170	0.44304239274449	0.625	0.228	1.18790446744182e-165	Fibroblasts	LMNA
1.23113996073211e-169	0.498571017640764	0.368	0.105	3.02121746363659e-165	Fibroblasts	DAP
6.32147118144928e-169	0.44893140493647	0.496	0.164	1.55128902792765e-164	Fibroblasts	AP3S1
1.56170434438701e-168	0.492636774878781	0.615	0.224	3.83242246112572e-164	Fibroblasts	PTTG1IP
2.14495819929873e-168	0.409120923661328	0.385	0.108	5.26372742107908e-164	Fibroblasts	ZMAT3
7.45296234236846e-168	0.260901733083581	0.259	0.055	1.82895695881722e-163	Fibroblasts	TTC3P1
2.46726682618954e-167	0.361708129931684	0.343	0.09	6.05467279146913e-163	Fibroblasts	QSOX1
4.98836467602124e-167	0.576983907080838	0.267	0.06	1.22414469149561e-162	Fibroblasts	NFIA
1.02970397513582e-165	0.396680899345558	0.406	0.12	2.5268935549833e-161	Fibroblasts	ATL3
1.39570230626068e-165	0.734994907152025	0.494	0.171	3.42505345956371e-161	Fibroblasts	PTMS
1.86658743165385e-164	0.374700372335779	0.282	0.066	4.58060555727855e-160	Fibroblasts	FTO
6.86586259439002e-164	0.400602031565176	0.431	0.132	1.68488268066331e-159	Fibroblasts	CBX5
7.67958934024253e-164	0.369812715486505	0.466	0.149	1.88457122409552e-159	Fibroblasts	BNIP3L
1.06238375038602e-163	0.327269148139308	0.497	0.163	2.60708972344729e-159	Fibroblasts	PRDX4
4.72407700372373e-163	0.450647801215606	0.306	0.077	1.1592884967138e-158	Fibroblasts	CNP
5.09396416988913e-163	0.519652548414729	0.415	0.128	1.25005880729079e-158	Fibroblasts	ATN1
8.81967377017913e-163	0.654494724363364	0.68	0.289	2.16434794320196e-158	Fibroblasts	B4GALT1
9.81003290121782e-163	0.431558715701378	0.253	0.055	2.40738207395885e-158	Fibroblasts	DBN1
2.13406502775872e-162	0.375820347351535	0.271	0.062	5.2369955781199e-158	Fibroblasts	HDGFL3
3.67996929528728e-162	0.414390285031855	0.475	0.157	9.03064465063498e-158	Fibroblasts	GORASP2
2.1450207855536e-160	0.370718804124383	0.26	0.059	5.26388100774854e-156	Fibroblasts	COPS7A
2.52115066551584e-160	0.342733489159704	0.33	0.086	6.18690373317586e-156	Fibroblasts	KDM5B
2.79136572078173e-160	0.393461704483357	0.251	0.055	6.85001147879835e-156	Fibroblasts	HEXA
5.36204376687322e-160	0.342700293433372	0.334	0.087	1.31584554039069e-155	Fibroblasts	C1orf54
8.74440698021049e-158	0.631540305066788	0.597	0.227	2.14587747294365e-153	Fibroblasts	STOM
1.58350228665062e-157	0.366353274772853	0.318	0.083	3.88591461144061e-153	Fibroblasts	NF1
1.99932250582275e-157	0.288822804737422	0.292	0.071	4.90633742928904e-153	Fibroblasts	MAP4K5
3.10619172033001e-157	0.307180205592527	0.308	0.078	7.62259448168985e-153	Fibroblasts	RCN2
1.41608104293791e-156	0.350862886849276	0.409	0.125	3.47506287936963e-152	Fibroblasts	GOLGA3
1.98444377709763e-156	0.528485103460532	0.523	0.186	4.86982502899758e-152	Fibroblasts	RSU1
2.41229084769193e-156	0.505755748829649	0.487	0.168	5.91976174023599e-152	Fibroblasts	MAN1A1
5.86441963113074e-156	0.397627659877591	0.409	0.124	1.43912857747948e-151	Fibroblasts	PDLIM1
1.02355641659916e-155	0.301470616435939	0.296	0.073	2.51180744633434e-151	Fibroblasts	APPL2
1.0895768472673e-155	0.361084021725878	0.308	0.079	2.67382158319396e-151	Fibroblasts	PLAU
2.68962580326734e-155	0.398853465734553	0.462	0.154	6.60034172121805e-151	Fibroblasts	HOOK3
6.17334812515221e-154	0.53365465581769	0.635	0.255	1.51493962991235e-149	Fibroblasts	PTEN
2.95086911532956e-153	0.391744281794188	0.277	0.068	7.24143280901874e-149	Fibroblasts	CYB5A
5.20292764577179e-153	0.330081829467897	0.265	0.062	1.2767984442724e-148	Fibroblasts	TTYH3
6.58150730505961e-153	0.454977543204186	0.326	0.09	1.61510189266163e-148	Fibroblasts	KIAA0930
1.25378968864186e-152	0.335759976873435	0.35	0.099	3.07679989592711e-148	Fibroblasts	GFPT1
1.29201771522613e-152	0.35121614536018	0.309	0.081	3.17061147316492e-148	Fibroblasts	IFT57
1.94419412137614e-152	0.432710014945498	0.372	0.11	4.77105237385705e-148	Fibroblasts	RAP2A
2.04233601753792e-152	0.388731952500965	0.311	0.082	5.01189258703806e-148	Fibroblasts	FSCN1
9.94067802194305e-152	0.385883240188702	0.487	0.167	2.43944238658482e-147	Fibroblasts	ACTN1
1.05703377256797e-151	0.415776920885015	0.269	0.065	2.59396087788181e-147	Fibroblasts	CYB561
2.44747556908541e-151	0.615858520820291	0.372	0.112	6.00610504653559e-147	Fibroblasts	CLU
2.55705051397173e-151	0.410488612056777	0.544	0.197	6.27500196128663e-147	Fibroblasts	CTDSP2
7.56708517365834e-151	0.334717751051534	0.395	0.12	1.85696270161576e-146	Fibroblasts	ZKSCAN1
6.28555666007352e-150	0.350165215058742	0.508	0.178	1.54247560438204e-145	Fibroblasts	RDX
1.46485427555554e-149	0.401229385331718	0.384	0.117	3.59475239221329e-145	Fibroblasts	HSBP1
2.56159199401123e-149	0.399087571479543	0.422	0.139	6.28614675330356e-145	Fibroblasts	TFG
3.37115880159204e-149	0.350293164891328	0.498	0.172	8.27282369910687e-145	Fibroblasts	KIDINS220
5.50919565785571e-149	0.539108507288911	0.594	0.235	1.35195661443779e-144	Fibroblasts	ATP2A2
5.57366919337993e-149	0.366313227898075	0.563	0.209	1.36777842005543e-144	Fibroblasts	TMEM248
1.45532957599439e-148	0.495222402247968	0.625	0.248	3.57137877949024e-144	Fibroblasts	ADD1
3.26099430869178e-148	0.347547214994606	0.297	0.078	8.00248003352962e-144	Fibroblasts	UBE2E3
3.95218796634705e-148	0.559405696219728	0.662	0.28	9.69866926941566e-144	Fibroblasts	TMED2
4.84987728898298e-148	0.39885326107078	0.318	0.088	1.19015988671642e-143	Fibroblasts	HEXB
1.03454965557897e-147	0.465442961624212	0.544	0.202	2.53878485479078e-143	Fibroblasts	AP2M1
3.98422333322844e-147	0.376914501903045	0.322	0.09	9.77728405974259e-143	Fibroblasts	STT3A
5.11155975384257e-147	0.57263368437171	0.773	0.342	1.25437676359297e-142	Fibroblasts	RTN4
8.12004013918579e-147	0.324203785603279	0.36	0.105	1.99265785015619e-142	Fibroblasts	DYNC1H1
3.38984086629144e-146	0.426344707608336	0.505	0.177	8.31866948587919e-142	Fibroblasts	SPTBN1
9.88928861429651e-146	0.439301148875318	0.443	0.152	2.42683142594836e-141	Fibroblasts	COPG1
3.51772686631581e-145	0.451145005529383	0.558	0.215	8.63250172993899e-141	Fibroblasts	SEC63
8.15491344429475e-145	0.294868634201771	0.344	0.098	2.00121575922993e-140	Fibroblasts	LRRC58
2.22856947062609e-144	0.335157293024087	0.524	0.189	5.46890948091641e-140	Fibroblasts	RDH11
8.06248323054112e-144	0.351553290680587	0.338	0.097	1.97853338477479e-139	Fibroblasts	DYNC1LI2
1.14146925555172e-143	0.488680798015902	0.633	0.263	2.80116555312391e-139	Fibroblasts	TMED9
8.74895053389092e-143	0.371654400769804	0.335	0.097	2.14699246101683e-138	Fibroblasts	DESI2
3.48032389456615e-142	0.6803073738028	0.914	0.516	8.54071483726532e-138	Fibroblasts	TPM4
1.90377481306286e-141	0.29516744849859	0.387	0.12	4.67186339125626e-137	Fibroblasts	TMEM106B
2.49388748133913e-141	0.600915730846948	0.414	0.14	6.11999987920623e-137	Fibroblasts	OAZ2
2.69171442642261e-140	0.443790729458457	0.721	0.311	6.60546720244107e-136	Fibroblasts	MORF4L1
2.9170064885282e-140	0.357449394329045	0.539	0.202	7.1583339228482e-136	Fibroblasts	MORF4L2
6.31035504827442e-140	0.368501919454925	0.299	0.081	1.54856112884654e-135	Fibroblasts	REXO2
6.90374376209681e-140	0.378229188773465	0.368	0.114	1.69417871921856e-135	Fibroblasts	DDX1
8.57743806721179e-140	0.422856112822314	0.252	0.061	2.10490330169377e-135	Fibroblasts	TJP1
1.47121445534632e-138	0.328155470451118	0.447	0.154	3.61036027341988e-134	Fibroblasts	CAPRIN1
1.87287205182194e-138	0.476028842032212	0.715	0.313	4.59602801517103e-134	Fibroblasts	TMEM59
2.98157607090633e-138	0.30987661191249	0.434	0.144	7.31678767800414e-134	Fibroblasts	CMTM3
2.70225710709148e-137	0.30096361895655	0.36	0.11	6.63133894080248e-133	Fibroblasts	C6orf89
4.13394683448619e-137	0.347926175089338	0.348	0.106	1.01447055318291e-132	Fibroblasts	PAPSS1
6.53375913155254e-137	0.315450587875105	0.373	0.117	1.60338449088299e-132	Fibroblasts	DCTD
7.85089252509662e-137	0.355086532786691	0.391	0.126	1.92660902565871e-132	Fibroblasts	ESD
6.94549694860262e-136	0.348008460685102	0.342	0.103	1.70442495118708e-131	Fibroblasts	TMEM165
9.10998511487707e-135	0.291524763547263	0.298	0.081	2.23559034719083e-130	Fibroblasts	DYNLT3
1.06350614768655e-134	0.322731532092361	0.319	0.092	2.6098440864228e-130	Fibroblasts	SAMD4B
1.28417846168996e-134	0.367980766588387	0.331	0.098	3.15137394498716e-130	Fibroblasts	FAM210B
3.84056178733474e-134	0.433603433496124	0.66	0.284	9.42473862611944e-130	Fibroblasts	TM9SF3
4.42722473829502e-134	0.404537296700361	0.444	0.156	1.0864409507776e-129	Fibroblasts	ATRAID
1.03595767379322e-133	0.365037434628256	0.511	0.19	2.54224013148857e-129	Fibroblasts	GANAB
1.51267200469207e-133	0.356571399520876	0.382	0.125	3.71209709951433e-129	Fibroblasts	SEC13
1.20258491241867e-132	0.311896529466097	0.324	0.095	2.95114337507542e-128	Fibroblasts	USP11
2.54604575461829e-132	0.337795869765835	0.626	0.25	6.24799628183328e-128	Fibroblasts	APLP2
1.20560953604991e-131	0.275613464107594	0.266	0.069	2.95856580146648e-127	Fibroblasts	CHST15
1.40902080501508e-131	0.311061689347194	0.459	0.162	3.45773705550701e-127	Fibroblasts	DDB1
1.98440622399382e-130	0.26866609576437	0.38	0.123	4.86973287368084e-126	Fibroblasts	TMED7
3.57215011574288e-130	0.453735346427277	0.856	0.44	8.76605638403303e-126	Fibroblasts	S100A6
1.25702391394215e-129	0.251579225123062	0.375	0.121	3.08473668481405e-125	Fibroblasts	IFNGR2
1.28363548304857e-129	0.354735600845416	0.699	0.303	3.15004147540118e-125	Fibroblasts	RAB1A
3.75452974601172e-129	0.325400848788602	0.311	0.091	9.21361599671277e-125	Fibroblasts	MCFD2
3.01523174316969e-127	0.292852922890866	0.262	0.07	7.39937869773841e-123	Fibroblasts	ITFG1
3.43960186687785e-127	0.276592307177425	0.271	0.073	8.44078298131825e-123	Fibroblasts	RARS2
7.12804682335538e-127	0.451008257175064	0.265	0.071	1.74922269045141e-122	Fibroblasts	CLSTN3
1.3215724504949e-126	0.411002636149837	0.364	0.119	3.24313879351449e-122	Fibroblasts	RABGAP1
6.26175781249326e-126	0.371822822483325	0.451	0.165	1.53663536718585e-121	Fibroblasts	MLEC
6.546152833495e-126	0.274080999955819	0.519	0.194	1.60642590533967e-121	Fibroblasts	ERLEC1
1.28004287123837e-125	0.257881338940339	0.309	0.091	3.14122520601896e-121	Fibroblasts	CLSTN1
2.48808259555504e-125	0.387408112396723	0.483	0.183	6.10575468949206e-121	Fibroblasts	PRDX3
3.01422527802258e-125	0.354144620255986	0.545	0.217	7.39690883226741e-121	Fibroblasts	MTCH1
3.93555948568114e-125	0.333990673305025	0.327	0.101	9.65786297786151e-121	Fibroblasts	SH3GL1
5.98398615441586e-125	0.30308687712809	0.475	0.175	1.46847020229365e-120	Fibroblasts	DUT
1.71261405459629e-124	0.341926648710855	0.378	0.126	4.2027548899793e-120	Fibroblasts	TMEM214
3.04424759299005e-123	0.400345169568085	0.426	0.153	7.47058359319758e-119	Fibroblasts	COMT
4.49254712452977e-123	0.323298742859779	0.527	0.206	1.10247106435961e-118	Fibroblasts	TMEM30A
7.90827896330571e-123	0.367694164874811	0.399	0.138	1.94069165759522e-118	Fibroblasts	FCGRT
2.71351100165518e-122	0.456404455426598	0.321	0.102	6.65895599806181e-118	Fibroblasts	PLD3
8.18518124251621e-122	0.430422019319713	0.33	0.105	2.00864347691348e-117	Fibroblasts	G6PC3
8.68882418216398e-121	0.259502688328112	0.254	0.068	2.13223745430304e-116	Fibroblasts	VKORC1L1
1.04583602999058e-120	0.406706194911093	0.262	0.073	2.56648161759688e-116	Fibroblasts	RUSC1
2.00769114327694e-120	0.336364058678877	0.348	0.112	4.92687406560161e-116	Fibroblasts	ZEB1
9.98082129152913e-120	0.336158302026151	0.484	0.186	2.44929354494125e-115	Fibroblasts	CHMP3
1.20753485343311e-119	0.3368934602992	0.58	0.239	2.96329053032485e-115	Fibroblasts	MORF4L1P1
2.19650652454894e-119	0.365577191818316	0.322	0.103	5.39022701124311e-115	Fibroblasts	TMEM14C
8.28426258025199e-119	0.355021641801373	0.257	0.07	2.03295803719384e-114	Fibroblasts	BORCS7
4.70644308238619e-118	0.490721812620073	0.328	0.107	1.15496113241757e-113	Fibroblasts	METTL7A
5.39224674988637e-118	0.76205671551961	0.84	0.553	1.32325735242211e-113	Fibroblasts	JUN
1.94864903860475e-117	0.36576154185581	0.328	0.107	4.78198474073605e-113	Fibroblasts	UBE2E1
9.84589871013988e-117	0.250486018428914	0.251	0.068	2.41618354346833e-112	Fibroblasts	DSTYK
7.01555338310916e-116	0.295993557708152	0.439	0.161	1.72161680021499e-111	Fibroblasts	FGD5-AS1
3.68043886128163e-115	0.329405596765085	0.302	0.093	9.03179696558511e-111	Fibroblasts	EIF2AK4
1.01687541118908e-114	0.333286071874657	0.497	0.196	2.495412259058e-110	Fibroblasts	IFNGR1
1.14453844211342e-114	0.363683005946235	0.435	0.163	2.80869733694633e-110	Fibroblasts	UGCG
4.34100855026255e-114	0.537061622875324	0.256	0.071	1.06528349823443e-109	Fibroblasts	NFIB
1.09462901992982e-113	0.304858608741379	0.363	0.124	2.68621961490779e-109	Fibroblasts	TMEM184B
1.77262975339439e-113	0.33990903597725	0.57	0.241	4.35003341482983e-109	Fibroblasts	GSTP1
2.34429892684017e-111	0.328503599874739	0.258	0.074	5.75290956646577e-107	Fibroblasts	ERC1
2.85647731840656e-111	0.271492963787838	0.279	0.084	7.00979533936969e-107	Fibroblasts	PIGK
3.09605200005867e-111	0.315604762460468	0.309	0.098	7.59771160814399e-107	Fibroblasts	COLGALT1
3.90259006841913e-111	0.420630975433161	0.766	0.379	9.57695602790055e-107	Fibroblasts	PRKAR1A
8.75697733046462e-111	0.285140527453471	0.519	0.209	2.14896223689602e-106	Fibroblasts	PRDX6
1.49085756971315e-110	0.552814396258841	0.342	0.116	3.65856447607607e-106	Fibroblasts	ID3
5.72806094551962e-110	0.384337513998966	0.551	0.23	1.40566615603051e-105	Fibroblasts	MAP4K4
5.57744097724815e-108	0.266817543143648	0.402	0.149	1.3687040158167e-103	Fibroblasts	YIPF3
1.02954200141851e-107	0.390239902096051	0.3	0.097	2.52649607148102e-103	Fibroblasts	CD151
1.43833700855416e-107	0.425013623298271	0.287	0.09	3.52967901899192e-103	Fibroblasts	RFTN1
2.34269711252937e-107	0.276066731979335	0.516	0.211	5.74897871414707e-103	Fibroblasts	TMCO1
2.41264080677609e-107	0.329177121400893	0.314	0.101	5.92062053982853e-103	Fibroblasts	SDC1
6.67204686599987e-106	0.266593982607045	0.334	0.113	1.63732030091637e-101	Fibroblasts	SPPL3
2.01918198612931e-104	0.270680683311217	0.268	0.081	4.95507259396134e-100	Fibroblasts	FAF2
1.5353901487014e-103	0.489187245225835	0.944	0.603	3.76784742491323e-99	Fibroblasts	AHNAK
1.11482583927096e-102	0.263893576034219	0.276	0.085	2.73578260957093e-98	Fibroblasts	ARHGEF7
1.72350480086501e-102	0.275448553014974	0.323	0.11	4.22948078132273e-98	Fibroblasts	PGRMC2
1.84130037615342e-102	0.307682903525544	0.762	0.354	4.51855112308049e-98	Fibroblasts	RAC1
2.41632558992325e-102	0.296074146961337	0.264	0.081	5.92966299767165e-98	Fibroblasts	RARS
3.8288532645843e-102	0.342400779934166	0.409	0.157	9.39600591128988e-98	Fibroblasts	NCOA7
6.7169307633376e-102	0.350130273293992	0.269	0.084	1.64833480932305e-97	Fibroblasts	CYFIP1
5.62399410580064e-101	0.296414414121824	0.338	0.119	1.38012815356348e-96	Fibroblasts	NCOR2
7.22038143404817e-101	0.635345292534805	0.929	0.734	1.77188160391542e-96	Fibroblasts	FOS
1.7788829167077e-100	0.281709974887502	0.51	0.214	4.3653786776007e-96	Fibroblasts	SUMO3
5.20293325814711e-100	0.314614475764009	0.561	0.248	1.2767998215493e-95	Fibroblasts	SEM1
6.36473954663057e-100	0.254744267546384	0.275	0.087	1.56190708474314e-95	Fibroblasts	TM9SF4
6.73214200478511e-100	0.25552959938042	0.478	0.197	1.65206764797427e-95	Fibroblasts	KRT10
3.6930285003949e-99	0.275360917393382	0.365	0.134	9.06269193996909e-95	Fibroblasts	ATXN10
7.94020449673965e-99	0.315668204672628	0.606	0.274	1.94852618349991e-94	Fibroblasts	TM9SF2
1.83472843992767e-98	0.29136736974509	0.34	0.121	4.5024235915825e-94	Fibroblasts	MBNL2
6.41013325912721e-98	0.263232341590224	0.499	0.207	1.57304670178982e-93	Fibroblasts	RAB5B
1.33749982361536e-95	0.264455527921685	0.325	0.115	3.28222456715209e-91	Fibroblasts	CUX1
1.75496968179274e-95	0.302247573696294	0.306	0.105	4.30669559911938e-91	Fibroblasts	BCAP29
2.80181102046484e-95	0.284180183014849	0.449	0.185	6.87564424422072e-91	Fibroblasts	NUCB1
4.05123298034241e-95	0.256128751079799	0.282	0.092	9.94172573376028e-91	Fibroblasts	MIR4435-2HG
4.42200244884527e-95	0.283730764366001	0.382	0.146	1.08515940094663e-90	Fibroblasts	TMX3
9.28524303647427e-94	0.261917047601415	0.304	0.106	2.27859864115079e-89	Fibroblasts	DNAJC15
3.82953886045649e-93	0.335575907341478	0.557	0.25	9.39768836356022e-89	Fibroblasts	UQCRQ
3.89335330781577e-92	0.292853549875769	0.405	0.161	9.5542890173799e-88	Fibroblasts	GLUD1
1.45431088598506e-91	0.451555497297638	0.726	0.384	3.56887891420733e-87	Fibroblasts	SERF2
4.44321138456137e-91	0.334755319256139	0.654	0.318	1.09036407377136e-86	Fibroblasts	REEP5
3.43640485607233e-90	0.257610825528219	0.305	0.108	8.4329375168015e-86	Fibroblasts	CSNK1E
2.9968228711615e-88	0.318038631057002	0.634	0.302	7.35420332583032e-84	Fibroblasts	DYNLL1
1.5028927093654e-87	0.26903833968918	0.312	0.113	3.6880987087827e-83	Fibroblasts	ZMPSTE24
1.10879390327802e-86	0.306885776754891	0.321	0.119	2.72098023864426e-82	Fibroblasts	CAMTA1
1.16448465190756e-86	0.256202891402989	0.318	0.117	2.85764533578114e-82	Fibroblasts	MRPL3
9.84087806771578e-86	0.326101056097243	0.266	0.091	2.41495147781745e-81	Fibroblasts	DDAH2
5.29631597803539e-85	0.356434976479342	0.804	0.433	1.29971594100988e-80	Fibroblasts	PDIA3
2.32118211351703e-84	0.27122745923164	0.308	0.112	5.69618090657079e-80	Fibroblasts	SERPINB6
3.9833526653906e-84	0.287161171570801	0.26	0.087	9.77514744086852e-80	Fibroblasts	MPRIP
5.52863304072766e-83	0.278124296253733	0.278	0.098	1.35672654819457e-78	Fibroblasts	FEZ2
3.05719848936614e-80	0.334789428750543	0.679	0.344	7.50236509290451e-76	Fibroblasts	TPI1
1.60979649468728e-79	0.271476432197528	0.303	0.114	3.95044059796258e-75	Fibroblasts	PSMD2
6.15951896505577e-76	0.314605870568832	0.319	0.125	1.51154595402469e-71	Fibroblasts	NCK2
9.10163228058258e-74	0.484701940142751	0.886	0.564	2.23354056165496e-69	Fibroblasts	MYL6
1.14881062815003e-73	0.418528633245325	0.804	0.458	2.81918128148017e-69	Fibroblasts	CALM2
1.15185598046786e-70	1.04124346664213	0.278	0.112	2.82665457606814e-66	Fibroblasts	SPARCL1
3.547163129958e-70	0.461864105679113	0.277	0.109	8.70473832091693e-66	Fibroblasts	CSRP1
4.13587088238993e-68	0.522326872787586	0.812	0.491	1.01494271453849e-63	Fibroblasts	MYH9
4.08483581570406e-67	0.308013076468965	0.303	0.125	1.00241870917378e-62	Fibroblasts	GPX4
7.4586852380438e-62	0.291126263863413	0.913	0.616	1.83036135741595e-57	Fibroblasts	ZFP36L1
2.36193561756264e-61	0.291052059190013	0.789	0.444	5.79619000549871e-57	Fibroblasts	SEPT7
4.68863767693155e-60	0.267391233071675	0.776	0.447	1.150591685919e-55	Fibroblasts	COX6C
2.1165198167633e-55	0.25796270646359	0.253	0.102	5.19393963033713e-51	Fibroblasts	A2M
3.54934802360307e-55	0.42912893198222	0.624	0.367	8.71010004992194e-51	Fibroblasts	SOCS3
4.23840784533639e-53	0.256032141415185	0.309	0.141	1.04010528524555e-48	Fibroblasts	ZMIZ1
8.77641588514757e-34	0.329694259481546	0.295	0.16	2.15373245821521e-29	Fibroblasts	MEF2C
0	7.99721922057471	0.998	0.213	0	Mast_cells	TPSB2
0	7.22719980080521	0.998	0.026	0	Mast_cells	CPA3
0	7.08567671782608	0.949	0.056	0	Mast_cells	TPSAB1
0	5.31353224337005	0.987	0.015	0	Mast_cells	MS4A2
0	4.9530270524355	0.743	0.007	0	Mast_cells	CTSG
0	4.84253301375909	0.913	0.036	0	Mast_cells	HPGD
0	4.46879846439408	0.546	0.005	0	Mast_cells	ADCYAP1
0	4.45640899850711	0.97	0.019	0	Mast_cells	KIT
0	4.20744845052322	0.96	0.052	0	Mast_cells	VWA5A
0	4.06080108702193	0.947	0.024	0	Mast_cells	GATA2
0	3.6067650679381	0.875	0.164	0	Mast_cells	LMO4
0	3.43625073675036	0.824	0.005	0	Mast_cells	HDC
0	3.24933428193415	0.807	0.005	0	Mast_cells	IL1RL1
0	3.24862252100134	0.8	0.002	0	Mast_cells	GCSAML
0	3.22587313688826	0.843	0.005	0	Mast_cells	HPGDS
0	3.19159991009231	0.389	0.004	0	Mast_cells	CMA1
0	3.18968809469192	0.862	0.112	0	Mast_cells	CLU
0	3.00866657637594	0.839	0.017	0	Mast_cells	SIGLEC17P
0	2.89588	0.764	0.01	0	Mast_cells	MAOB
0	2.88725760213901	0.868	0.18	0	Mast_cells	ACSL4
0	2.88244515530599	0.766	0.014	0	Mast_cells	C1orf186
0	2.8298534901019	0.743	0.007	0	Mast_cells	SLC45A3
0	2.79590533037721	0.49	0.049	0	Mast_cells	CSF1
0	2.64042842473525	0.86	0.141	0	Mast_cells	CAPG
0	2.58953301387035	0.607	0.027	0	Mast_cells	CAVIN2
0	2.52050534953307	0.667	0.002	0	Mast_cells	AL157895.1
0	2.43201174865734	0.675	0.027	0	Mast_cells	PTGS1
0	2.3736810869606	0.584	0.007	0	Mast_cells	RGS13
0	2.2522471966715	0.805	0.124	0	Mast_cells	ARHGEF6
0	2.15222131957341	0.679	0.058	0	Mast_cells	BTK
0	2.12838760153177	0.603	0.023	0	Mast_cells	RAB27B
0	1.95229634079413	0.452	0.005	0	Mast_cells	LIF
0	1.94344737377397	0.454	0.002	0	Mast_cells	CALB2
0	1.91022349742882	0.535	0.002	0	Mast_cells	SLC18A2
0	1.90788494718862	0.499	0.019	0	Mast_cells	ALDH1A1
0	1.8585340003506	0.51	0.047	0	Mast_cells	CNRIP1
0	1.84700944680121	0.382	0.005	0	Mast_cells	TPSD1
0	1.83403026866262	0.584	0.048	0	Mast_cells	GRAP2
0	1.83342941929012	0.618	0.09	0	Mast_cells	STX3
0	1.76072518804323	0.616	0.048	0	Mast_cells	TESPA1
0	1.7481582952405	0.469	0.013	0	Mast_cells	MITF
0	1.74731039712946	0.412	0.031	0	Mast_cells	HS3ST1
0	1.72819313805795	0.442	0.012	0	Mast_cells	MLPH
0	1.72242960402291	0.359	0.011	0	Mast_cells	CLNK
0	1.71480726376957	0.476	0.002	0	Mast_cells	SIGLEC8
0	1.71094867721057	0.544	0.053	0	Mast_cells	ATP6V0A2
0	1.66895575853443	0.325	0.001	0	Mast_cells	ITGA2B
0	1.65465863900701	0.486	0.021	0	Mast_cells	HS6ST1
0	1.62935533111138	0.459	0.03	0	Mast_cells	EPB41L1
0	1.62792862151799	0.423	0.001	0	Mast_cells	CDK15
0	1.59818118291704	0.51	0.065	0	Mast_cells	BACE2
0	1.55302589083588	0.414	0.021	0	Mast_cells	FCER1A
0	1.5413929674348	0.512	0.059	0	Mast_cells	ALOX5
0	1.54112555600629	0.45	0.026	0	Mast_cells	SMYD3
0	1.52631030439833	0.408	0.003	0	Mast_cells	KCNH2
0	1.52153854626244	0.437	0.022	0	Mast_cells	P2RX1
0	1.41952543845749	0.448	0.03	0	Mast_cells	CD22
0	1.32593447858268	0.393	0.031	0	Mast_cells	ALS2
0	1.27601726878466	0.295	0.002	0	Mast_cells	LINC01835
0	1.24854984961267	0.374	0.026	0	Mast_cells	AKAP5
0	1.22341504347585	0.297	0.008	0	Mast_cells	MYB
0	1.20695334770865	0.274	0.001	0	Mast_cells	ENPP3
0	1.18977910806072	0.282	0.013	0	Mast_cells	NTM
0	1.18213194924096	0.31	0.012	0	Mast_cells	TAL1
0	1.13105161475204	0.318	0.001	0	Mast_cells	PAQR5
0	1.12172385593919	0.295	0.001	0	Mast_cells	SVOPL
0	1.1003055878827	0.263	0.007	0	Mast_cells	AC020571.1
0	1.02551988000477	0.265	0.005	0	Mast_cells	MEIS2
0	1.01302568631301	0.285	0.004	0	Mast_cells	PGBD5
0	0.923426566657953	0.251	0.005	0	Mast_cells	GMPR
7.32144505273267e-307	1.10091814957293	0.367	0.031	1.7966826159406e-302	Mast_cells	RASGRP4
2.43329042826586e-300	1.64731344492586	0.527	0.07	5.97129471096441e-296	Mast_cells	DLC1
1.27844305058908e-299	1.78200212721013	0.737	0.131	3.1372992461456e-295	Mast_cells	CD84
7.62656989213971e-299	1.94695565230573	0.762	0.151	1.87156025153108e-294	Mast_cells	CD82
5.61481163443302e-293	2.15936971547162	0.684	0.13	1.37787477508986e-288	Mast_cells	CTSD
1.54421271095223e-292	1.78772676263345	0.45	0.052	3.78949799267677e-288	Mast_cells	AKAP12
2.8542629705491e-288	1.01559731355862	0.276	0.018	7.00436132972748e-284	Mast_cells	CD33
1.22152914240532e-285	1.44141402112498	0.59	0.088	2.99763251546265e-281	Mast_cells	TIMP3
2.47599186956919e-282	1.65959571216144	0.594	0.095	6.07608404792278e-278	Mast_cells	LPCAT2
3.75753532410162e-276	1.35058825209387	0.471	0.057	9.22099168534537e-272	Mast_cells	ADAM12
1.43755557941305e-274	1.69828317683591	0.488	0.065	3.52776139187962e-270	Mast_cells	LEO1
4.55141783906713e-270	2.04671487018051	0.65	0.121	1.11691793770707e-265	Mast_cells	PLIN2
3.13841788948186e-268	1.34293595471426	0.359	0.035	7.70167750078848e-264	Mast_cells	FER
2.82838879573194e-248	1.70369887494345	0.605	0.111	6.94086610472619e-244	Mast_cells	ARHGAP18
4.00311971089155e-248	2.13707671022972	0.777	0.198	9.82365577052785e-244	Mast_cells	AHR
1.49515295338509e-243	1.2870809001894	0.469	0.063	3.669105347607e-239	Mast_cells	SYTL2
2.10069759487925e-239	1.41632944343289	0.924	0.235	5.15511189783368e-235	Mast_cells	FCER1G
6.20928303167487e-239	1.44081613535456	0.473	0.069	1.52375805597301e-234	Mast_cells	CTNNBL1
1.81591496440932e-238	1.76357563647106	0.452	0.064	4.45625532266048e-234	Mast_cells	FAM46A
2.56365154731255e-237	1.1934	0.357	0.039	6.29120089710499e-233	Mast_cells	BMP2K
8.68662847621689e-237	2.04814731719878	0.955	0.418	2.13169862806363e-232	Mast_cells	CD63
6.95908430292655e-233	1.72294072386527	0.715	0.162	1.70775928793817e-228	Mast_cells	CD9
5.39154988858684e-227	1.37862261953332	0.352	0.04	1.32308634265921e-222	Mast_cells	ACOT7
5.53582558915378e-227	1.00096440640128	0.378	0.043	1.35849159957834e-222	Mast_cells	RAB37
1.34782162173403e-226	1.56326487613483	0.512	0.087	3.30755425973531e-222	Mast_cells	VAT1
4.34165472128069e-225	2.48853796518171	0.72	0.176	1.06544206860228e-220	Mast_cells	DUSP6
1.13549260102906e-220	1.60095360693368	0.414	0.058	2.78649884292532e-216	Mast_cells	NSMCE1
1.3008930284847e-220	1.50549567544418	0.452	0.068	3.19239149190146e-216	Mast_cells	GALC
9.67185818541833e-217	0.997293275317861	0.251	0.021	2.37347399870166e-212	Mast_cells	KIAA1522
1.02165026297272e-216	1.36955804477316	0.45	0.068	2.50712974533505e-212	Mast_cells	NDFIP2
1.34740442876896e-216	1.25194318067854	0.399	0.052	3.30653046819903e-212	Mast_cells	ADRB2
4.21378846101481e-214	1.20080957959392	0.471	0.072	1.03406368833303e-209	Mast_cells	LAT2
4.94775001176657e-206	1.41339763901564	0.544	0.105	1.21417785288752e-201	Mast_cells	GM2A
7.57691431321185e-203	1.54879333576484	0.52	0.101	1.85937477246219e-198	Mast_cells	FAM129B
5.82573821172625e-202	1.30596614988571	0.395	0.057	1.42963615715762e-197	Mast_cells	PBX1
2.67439161362122e-197	2.33176444567218	0.875	0.331	6.56295701982648e-193	Mast_cells	CD69
1.24347053021336e-193	1.70797467150838	0.958	0.447	3.05147668114359e-189	Mast_cells	ANXA1
1.51766988087878e-187	1.2389920299626	0.435	0.071	3.72436188767652e-183	Mast_cells	STXBP5
5.21814764915298e-183	1.22399586105287	0.83	0.247	1.28053343310214e-178	Mast_cells	SAMSN1
8.04274999575637e-180	1.15083826555027	0.312	0.038	1.97369084895861e-175	Mast_cells	GALNT6
7.46638537357019e-177	1.62428636625177	0.862	0.313	1.83225097067412e-172	Mast_cells	LAPTM4A
5.1086715695296e-176	1.74289959414268	0.813	0.282	1.25366800316256e-171	Mast_cells	BHLHE40
1.63823516780269e-174	1.28756981269971	0.418	0.07	4.0202291017878e-170	Mast_cells	DUSP10
1.62926144265997e-173	0.964548499317668	0.308	0.038	3.99820758028757e-169	Mast_cells	P2RY14
1.31667502920667e-172	1.3137418987137	0.567	0.126	3.23112052167318e-168	Mast_cells	GNPTAB
1.5823793565591e-170	1.37278246972646	0.357	0.054	3.88315894099603e-166	Mast_cells	RHOBTB3
2.47458428661752e-170	1.36549754681602	0.539	0.121	6.07262983935941e-166	Mast_cells	CLCN3
5.80328195079372e-168	1.00063692276481	0.293	0.037	1.42412539072478e-163	Mast_cells	SLC2A6
3.45521696669159e-166	2.17801133058742	0.96	0.658	8.47910243626117e-162	Mast_cells	FOSB
2.87841825213653e-164	1.62208863624821	0.786	0.269	7.06363839074304e-160	Mast_cells	FOXP1
2.0026082205984e-155	0.977899480475819	0.323	0.047	4.91440057334848e-151	Mast_cells	HAVCR2
3.2893617944737e-155	1.07619528446634	0.318	0.046	8.07209384363846e-151	Mast_cells	SPECC1
9.9266055692021e-155	1.34858715812335	0.573	0.149	2.4359890066822e-150	Mast_cells	SLC44A1
2.305637478118e-154	1.0837380905156	0.327	0.049	5.65803437130156e-150	Mast_cells	HK2
8.73459439391981e-154	1.54881020229215	0.686	0.218	2.14346946426792e-149	Mast_cells	PRDX6
4.7403356802107e-153	0.98115017816147	0.342	0.054	1.16327837592371e-148	Mast_cells	EMILIN2
6.63049326734804e-153	1.10545631915132	0.699	0.193	1.62712304780721e-148	Mast_cells	CSF2RB
2.40912880145809e-152	1.04358541660672	0.527	0.112	5.91200207877814e-148	Mast_cells	TMEM154
7.35574460875614e-150	1.44736926106268	0.992	0.74	1.80509972698876e-145	Mast_cells	VIM
1.53862916233967e-149	1.5643898084278	0.945	0.422	3.77579596438155e-145	Mast_cells	RGS1
2.42737332702988e-148	0.90232455589082	0.289	0.039	5.95677414453133e-144	Mast_cells	PLAT
5.87404795842447e-148	1.0373335136031	0.416	0.075	1.44149136899737e-143	Mast_cells	TNIK
2.10536208085086e-146	1.03549235954929	0.374	0.066	5.16655854640802e-142	Mast_cells	BEX4
2.80860146413601e-146	1.30218390354948	0.41	0.079	6.89230799298978e-142	Mast_cells	TMEM176B
8.90078528662345e-143	1.46073456610753	0.648	0.198	2.18425270933739e-138	Mast_cells	ASAH1
3.27203704835871e-141	0.772122539970016	0.251	0.031	8.02957891667228e-137	Mast_cells	SOX13
1.21800459440865e-138	1.4719855645557	0.586	0.162	2.98898327467883e-134	Mast_cells	SGK1
2.99545163558115e-138	1.20677702375258	0.41	0.081	7.35083831371614e-134	Mast_cells	LAX1
5.56130045933692e-138	1.00214778839538	0.35	0.062	1.36474313272128e-133	Mast_cells	SLC11A2
5.25340380783036e-137	0.828579722712266	0.261	0.035	1.28918529444157e-132	Mast_cells	ACVR1B
2.17060413788192e-136	1.34145274412245	0.777	0.283	5.32666255436223e-132	Mast_cells	OSBPL8
8.13817897097584e-136	1.15197456248453	0.348	0.063	1.99710911947747e-131	Mast_cells	FERMT2
1.49213837728059e-133	0.987619395518342	0.369	0.069	3.66170757784656e-129	Mast_cells	TRIM24
2.31589294136098e-132	1.0061728209449	0.306	0.049	5.68320127809984e-128	Mast_cells	KREMEN1
8.03428990039038e-132	1.36349660229417	0.601	0.172	1.9716147415558e-127	Mast_cells	TNFSF10
1.05752186640593e-129	0.949559004753481	0.301	0.048	2.59515866016016e-125	Mast_cells	LAIR1
2.06333858361419e-129	1.35781606074152	0.911	0.467	5.06343288418922e-125	Mast_cells	CD44
1.47074598101918e-126	0.87060611357135	0.363	0.069	3.60921063742106e-122	Mast_cells	ARHGEF40
2.8774824366079e-125	1.0524314603651	0.355	0.068	7.06134189943579e-121	Mast_cells	MAST4
5.63743632376066e-125	1.69386835010416	0.456	0.111	1.38342687385087e-120	Mast_cells	VEGFA
5.61974711373312e-122	0.850378771292014	0.304	0.05	1.37908594171011e-117	Mast_cells	IL18R1
1.27733629730343e-121	1.04962181805557	0.488	0.123	3.13458327358262e-117	Mast_cells	PMP22
8.68626134917509e-121	1.18741839861678	0.972	0.626	2.13160853508757e-116	Mast_cells	RAC2
2.66820425335695e-118	0.956321140196307	0.325	0.061	6.54777323773795e-114	Mast_cells	SLC43A3
4.9251385998881e-115	1.15093366613928	0.614	0.189	1.20862901241254e-110	Mast_cells	ZEB2
3.93973044386376e-114	1.02620613288971	0.323	0.063	9.66809850924167e-110	Mast_cells	ACER3
9.18907453543877e-114	0.967082640167023	0.304	0.055	2.25499889099667e-109	Mast_cells	TNS1
1.41500902090545e-112	1.92274980806734	0.758	0.328	3.47243213730197e-108	Mast_cells	EGR1
1.29586013941985e-111	0.854988914335306	0.399	0.089	3.18004078213632e-107	Mast_cells	PAK1
2.61310169037101e-111	0.804901347805273	0.291	0.05	6.41255154817047e-107	Mast_cells	TIAM1
3.1977109417788e-110	1.26796184937075	0.522	0.145	7.84718265112518e-106	Mast_cells	CD83
1.07551037656297e-109	1.45764700877848	0.671	0.257	2.63930246408553e-105	Mast_cells	LGALS3
1.39840054728026e-109	1.07371665603718	0.467	0.126	3.43167494302576e-105	Mast_cells	SWAP70
1.57524614593654e-109	1.1999974970162	0.454	0.117	3.86565404212826e-105	Mast_cells	STMN1
4.85863675664955e-108	1.19381196764535	0.35	0.076	1.1923094600818e-103	Mast_cells	SLC26A2
3.65849508230446e-107	0.804972651166646	0.306	0.058	8.97794693197515e-103	Mast_cells	ABCC1
1.06872129844078e-105	1.10434378305171	0.516	0.15	2.62264206637368e-101	Mast_cells	RGS10
3.59808746787681e-105	1.34864185304902	0.726	0.302	8.82970664616969e-101	Mast_cells	NCOA4
4.62050720288863e-105	0.759301572859734	0.265	0.044	1.13387246758887e-100	Mast_cells	NMT2
6.79091020672315e-105	1.49230579996322	0.495	0.144	1.66648936472986e-100	Mast_cells	TSC22D1
7.79727409909656e-105	0.89264463202184	0.289	0.054	1.91345106391829e-100	Mast_cells	SPRED1
2.3692950568417e-104	0.872176949310733	0.297	0.055	5.81425006948953e-100	Mast_cells	RPS6KA5
1.05806333960265e-103	0.641059875733855	0.762	0.291	2.59648743538491e-99	Mast_cells	GLUL
1.57056491496103e-102	0.88583261977026	0.352	0.077	3.85416630131436e-98	Mast_cells	ZNRF1
1.64944517824929e-102	0.965136654873186	0.403	0.1	4.04773846742376e-98	Mast_cells	AGPS
2.02711810284945e-102	0.640979984390177	0.318	0.06	4.97454782439254e-98	Mast_cells	KLRG1
6.66388410512134e-102	1.42686385160471	0.737	0.326	1.63531715939678e-97	Mast_cells	NFKBIZ
1.33082776134725e-99	1.2851728254761	0.771	0.378	3.26585132634616e-95	Mast_cells	SEPT2
1.72832902402392e-98	1.60453222075266	0.624	0.244	4.2413194249547e-94	Mast_cells	LMNA
8.32428397221134e-98	0.998369406870604	0.437	0.12	2.04277928678066e-93	Mast_cells	RAPGEF2
1.63231031225421e-95	0.42738622297464	0.985	0.718	4.00568950627182e-91	Mast_cells	SRGN
2.22261217735217e-95	0.957451586101795	0.527	0.165	5.45429028322223e-91	Mast_cells	RNF130
6.91979289143633e-94	1.08875656163002	0.289	0.06	1.69811717555848e-89	Mast_cells	RAB32
4.31904018760619e-93	0.722745011535097	0.34	0.074	1.05989246203856e-88	Mast_cells	ITGAM
1.00946917483961e-92	0.931625799122869	0.301	0.065	2.47723735505641e-88	Mast_cells	DPY19L1
2.00153298088529e-92	1.11550000373052	0.639	0.242	4.91176193509251e-88	Mast_cells	PRNP
1.11179681890433e-91	0.75638965590041	0.304	0.064	2.72834939359122e-87	Mast_cells	MPP1
4.27180668685536e-90	0.738514994126096	0.739	0.273	1.04830136095431e-85	Mast_cells	ALOX5AP
7.36901647399887e-90	1.17114107594756	0.892	0.573	1.80835664271932e-85	Mast_cells	NFKBIA
1.05502969907347e-89	1.03292989733526	0.331	0.079	2.5890428815263e-85	Mast_cells	PEPD
6.68166262556765e-89	0.823563352538866	0.654	0.235	1.6396800083143e-84	Mast_cells	ITM2C
7.63867508843266e-87	0.945831254773645	0.431	0.129	1.87453086670137e-82	Mast_cells	CREB3L2
1.61924714793272e-86	0.66877899574182	0.556	0.172	3.97363250102689e-82	Mast_cells	CAVIN1
7.41934651345879e-85	1.01331206499902	0.454	0.133	1.82070763440279e-80	Mast_cells	IRS2
2.5178043145791e-84	0.781504238993812	0.329	0.078	6.17869178797712e-80	Mast_cells	DENND1B
1.00060502594184e-83	1.00465028541201	0.488	0.161	2.45548473366128e-79	Mast_cells	BNIP3L
1.17632839158236e-83	0.895127040254016	0.361	0.095	2.88670987294311e-79	Mast_cells	MLLT1
3.63030850991767e-83	0.543932319020824	0.327	0.075	8.90877708333796e-79	Mast_cells	ADGRE2
5.9519670324193e-83	1.02017118811842	0.459	0.145	1.4606127097557e-78	Mast_cells	BST2
6.57975940907311e-83	0.902423560868468	0.291	0.065	1.61467295898654e-78	Mast_cells	SMARCAD1
6.89631877716724e-83	0.868048360842095	0.272	0.058	1.69235662791684e-78	Mast_cells	MSRA
1.98424896339057e-82	0.826569592878339	0.304	0.069	4.86934695616045e-78	Mast_cells	GAS7
2.73533517505055e-82	0.828587053298355	0.274	0.058	6.71251251957405e-78	Mast_cells	FAM110A
1.06493520966605e-81	0.942551188006633	0.361	0.096	2.61335100452048e-77	Mast_cells	RHBDD2
1.52270543119092e-81	1.30786640992512	0.628	0.259	3.73671912814251e-77	Mast_cells	GADD45B
1.89690085825346e-81	0.776740039494574	0.261	0.054	4.65499470615399e-77	Mast_cells	SMIM3
5.59466968504424e-81	0.912856947245059	0.488	0.16	1.37293194070986e-76	Mast_cells	ABHD2
2.07688032212421e-80	0.717556360125416	0.304	0.07	5.09666431049282e-76	Mast_cells	C10orf128
5.82268381079404e-80	0.937165817187994	0.301	0.071	1.42888660716886e-75	Mast_cells	MAPK6
1.16588673405354e-76	0.814666292806025	0.261	0.057	2.86108604536739e-72	Mast_cells	HLTF
1.99957982043743e-76	0.780517730044044	0.251	0.054	4.90696887935346e-72	Mast_cells	SOGA1
4.07203157209405e-75	1.00443295756252	0.285	0.067	9.9927654779188e-71	Mast_cells	FHL1
8.20067314996318e-75	1.06815461482649	0.811	0.474	2.01244519100096e-70	Mast_cells	CANX
9.85735671293875e-75	0.760150551134669	0.253	0.055	2.41899533735517e-70	Mast_cells	ADPRH
1.18013978839331e-74	1.05836672103306	0.465	0.163	2.89606304071719e-70	Mast_cells	SNX5
6.66313573988815e-74	0.859340865946306	0.393	0.116	1.63513351056855e-69	Mast_cells	C21orf91
7.8670932784343e-74	0.754842912669646	0.359	0.096	1.93058469052778e-69	Mast_cells	C1orf162
1.11375147299435e-73	0.891116733255724	0.423	0.128	2.73314611472815e-69	Mast_cells	PRKX
1.26914314252894e-73	0.741321904229397	0.374	0.105	3.11447727176601e-69	Mast_cells	SPINT2
1.72451686110086e-73	0.838624910260845	0.255	0.057	4.2319643771415e-69	Mast_cells	GBE1
1.47855125131256e-71	0.703727216110419	0.406	0.123	3.62836477072101e-67	Mast_cells	ESYT1
1.95883032286718e-71	0.920501589416254	0.917	0.618	4.80696961231606e-67	Mast_cells	AHNAK
2.3619819223471e-71	1.06190266078913	0.503	0.185	5.79630363743978e-67	Mast_cells	CCDC88A
1.81684216622396e-70	0.87224141853677	0.968	0.807	4.45853067591361e-66	Mast_cells	ZFP36
2.18278874273618e-70	0.824102283039128	0.879	0.507	5.35656357467459e-66	Mast_cells	S100A4
4.5047139451771e-70	0.607167535786952	0.403	0.12	1.10545680214646e-65	Mast_cells	CXCL16
4.21537074416577e-69	1.08920612148719	0.414	0.134	1.03445198061828e-64	Mast_cells	SOX4
3.34107261895802e-67	0.913569700642717	0.588	0.246	8.19899220692298e-63	Mast_cells	CRTAP
7.96100482439383e-67	0.771231887214808	0.312	0.086	1.95363058390625e-62	Mast_cells	PARVB
1.41298126329401e-66	0.387355086315375	0.864	0.447	3.46745602012351e-62	Mast_cells	RGS2
2.04245426902116e-65	0.814192321895354	0.423	0.141	5.01218277617793e-61	Mast_cells	B4GALT5
5.321048765308e-65	0.892554473355168	0.832	0.478	1.30578536700658e-60	Mast_cells	SLC2A3
5.12795859591763e-64	0.809548262814799	0.386	0.121	1.25840103943819e-59	Mast_cells	PTPN6
3.10016363405768e-63	0.89201077993852	0.331	0.1	7.60780155797756e-59	Mast_cells	OAF
6.98439711414359e-63	0.834656100798714	0.756	0.395	1.71397105181084e-58	Mast_cells	PRKAR1A
1.12983881338621e-62	0.908011589195112	0.775	0.42	2.77262444804977e-58	Mast_cells	LAPTM5
1.39463296587882e-62	0.428415306738056	0.745	0.356	3.42242929826663e-58	Mast_cells	CTSB
2.3587413844455e-61	0.685195220797863	0.291	0.078	5.78835135742925e-57	Mast_cells	TMEM176A
5.04478725508644e-59	0.697540297993213	0.448	0.156	1.23799079239821e-54	Mast_cells	PTGS2
5.50128834717387e-59	0.595436319352857	0.374	0.119	1.35001616039647e-54	Mast_cells	PLXNC1
1.6896345158357e-58	0.807712278607071	0.62	0.273	4.14636310186082e-54	Mast_cells	RASSF5
6.71220610737699e-58	0.861301325740988	0.58	0.259	1.64717537875031e-53	Mast_cells	EFCAB14
1.73431767228224e-57	0.796971313099442	0.291	0.086	4.2560155677806e-53	Mast_cells	HSD17B4
2.14290494042685e-57	0.62848951335756	0.431	0.161	5.25868872380749e-53	Mast_cells	TIMP1
2.82180589689241e-57	0.824415323291783	0.811	0.492	6.92471167097398e-53	Mast_cells	PPP1R15A
5.86054803688916e-57	0.640106110818118	0.306	0.089	1.4381784882526e-52	Mast_cells	PTAFR
7.56513206154909e-56	0.657609008719624	0.282	0.081	1.85648340790415e-51	Mast_cells	HS2ST1
5.88778069887396e-54	0.697134005224146	0.393	0.138	1.44486138350367e-49	Mast_cells	CTR9
7.78153020517314e-54	0.728978613306311	0.28	0.082	1.90958751234949e-49	Mast_cells	GATAD1
8.77867277467933e-54	0.724391615131219	0.253	0.069	2.15428629890631e-49	Mast_cells	NFIA
2.05136043853727e-53	0.804783330063898	0.662	0.339	5.03403851617045e-49	Mast_cells	PEBP1
3.46222985289707e-53	0.621579312381999	0.495	0.19	8.4963120590094e-49	Mast_cells	IQGAP2
5.33876025392649e-53	0.690429364083068	0.291	0.088	1.31013176631356e-48	Mast_cells	ANXA4
1.76919213452566e-52	1.21471467271738	0.512	0.227	4.34159749812597e-48	Mast_cells	TUBA1A
4.92457792295148e-52	0.700218951973378	0.327	0.107	1.20849142229229e-47	Mast_cells	FMNL3
8.62914720163253e-52	0.877742556251781	0.261	0.072	2.11759272328062e-47	Mast_cells	EGR3
1.05230709622193e-51	0.964955700196767	0.669	0.354	2.58236161412862e-47	Mast_cells	MYADM
2.03607555609415e-51	0.508389302775558	0.384	0.134	4.99652941465505e-47	Mast_cells	CPPED1
2.26599107315053e-51	0.496877722945151	0.998	0.977	5.56074209351141e-47	Mast_cells	MT-ND4
8.0018719854732e-51	0.71613332918489	0.707	0.362	1.96365938523512e-46	Mast_cells	ELF1
1.22814026331246e-50	0.736489435897919	0.505	0.22	3.01385620616877e-46	Mast_cells	ANXA11
4.28925658234621e-50	0.584079527074433	0.359	0.121	1.05258356530776e-45	Mast_cells	ATP2A3
2.66981240605596e-49	0.73385514163018	0.338	0.116	6.55171964446134e-45	Mast_cells	TSNAX
8.4840928706602e-49	0.729298521631409	0.701	0.366	2.08199639046001e-44	Mast_cells	IDS
1.84199994774415e-48	0.586559638448647	0.287	0.088	4.52026787176414e-44	Mast_cells	CRBN
2.27035858114903e-48	0.696130096079102	0.31	0.102	5.57145995813971e-44	Mast_cells	PARP4
4.58267576019783e-48	0.821854325092569	0.703	0.366	1.12458863155255e-43	Mast_cells	ID2
8.23074628359899e-48	0.798060533829452	0.406	0.162	2.01982513799519e-43	Mast_cells	ATP6V1F
1.80502610478524e-47	0.513106817480132	0.894	0.588	4.42953406114299e-43	Mast_cells	PSAP
7.41134619584721e-47	0.306365809217496	0.556	0.248	1.8187443564609e-42	Mast_cells	CST3
1.70007594268038e-46	0.754115093116417	0.31	0.105	4.17198636333764e-42	Mast_cells	CHST2
2.78861559714491e-46	0.571098010350801	0.934	0.65	6.84326267539361e-42	Mast_cells	ARHGDIB
2.96587327139779e-46	0.572525378084907	0.609	0.279	7.27825300801018e-42	Mast_cells	VAMP8
4.681602678656e-46	0.503180396086741	0.996	0.971	1.14886529734218e-41	Mast_cells	MT-ND3
1.74455005389484e-45	0.790589643870164	0.361	0.134	4.28112583225795e-41	Mast_cells	RASGEF1B
1.92928382562315e-45	0.492359298193008	0.996	0.948	4.73446250807921e-41	Mast_cells	MT-CO1
4.7267768916789e-45	0.563899600645985	0.992	0.806	1.159951049218e-40	Mast_cells	PTMA
5.90858627712976e-45	0.731702531696824	0.459	0.193	1.44996707240764e-40	Mast_cells	ELL2
1.24393801018425e-44	0.584812235601739	0.527	0.223	3.05262387699214e-40	Mast_cells	PAG1
1.32686751635264e-43	0.399956190234893	0.495	0.201	3.25613288512937e-39	Mast_cells	RHOH
2.08375728049859e-43	0.664589767809497	0.27	0.088	5.11354036634355e-39	Mast_cells	CKAP5
3.26894865607162e-43	0.435056117059207	0.352	0.124	8.02200000199975e-39	Mast_cells	ARHGAP25
1.03137412484174e-42	0.527477856433847	0.255	0.078	2.53099210236162e-38	Mast_cells	GSE1
1.14133208605959e-42	0.889684825653422	0.862	0.63	2.80082893919024e-38	Mast_cells	KLF6
4.1331526610624e-42	0.545467484582905	0.423	0.174	1.01427566302471e-37	Mast_cells	RALB
4.61945526893569e-42	0.639269055583896	0.285	0.098	1.13361432299682e-37	Mast_cells	DDAH2
5.94058893733108e-42	0.671558557936309	0.433	0.186	1.45782052522105e-37	Mast_cells	GNAQ
6.49666720013941e-42	0.751120088146871	0.469	0.217	1.59428213091421e-37	Mast_cells	AP2M1
1.29021461327945e-41	0.616982180888812	0.378	0.153	3.16618666098778e-37	Mast_cells	STMP1
1.40145682322606e-41	0.476146432068789	0.431	0.171	3.43917504419676e-37	Mast_cells	GPR65
2.84238149097277e-41	0.812739416154058	0.527	0.256	6.97520417884718e-37	Mast_cells	CD81
4.14914442992346e-41	0.66830797285337	0.369	0.149	1.01820004310322e-36	Mast_cells	PCMT1
1.69086301879851e-40	0.603932750124772	0.909	0.661	4.14937784813155e-36	Mast_cells	PTMAP2
1.85052385639586e-40	0.656051850775626	0.69	0.377	4.54118554359545e-36	Mast_cells	NR4A2
2.55908012553103e-40	0.648065573388176	0.584	0.301	6.27998262805314e-36	Mast_cells	NORAD
3.112331207172e-40	0.581299840165427	0.955	0.809	7.63766078240008e-36	Mast_cells	MT-ND4L
3.18847339103199e-40	0.251314059122921	0.682	0.35	7.82451370159251e-36	Mast_cells	SERPINB1
[truncated: 4,015 more rows]

## Sheet: Table S4
Table S4. Intersection genes between the 114 necroptosis-related genes and various cell populations.
Markers	NRGs	Markers|NRGs
TRAC	RIPK1	TNFAIP3
TRBC2	RIPK3	CYLD
IL7R	MLKL	BIRC3
CD2	CASP8	HNRNPA1
TRBC1	TNF	HMGB1
CD3D	ITPK1	ADAR
SPOCK2	IPMK	PTGES3
MAF	MAP3K7	BRD4
CD3E	CASP6	GNLY
BCL11B	TRPM7	AXL
CD3G	FADD	SLC39A7
ICOS	PGLYRP1	CTSB
CD8A	SPATA2	JUN
IL32	SIRT3	NFKBIA
CCL5	TNIP1	HSPA5
CXCR4	TP53	FLOT1
CD96	BIRC2	PARP1
TCF7	MEFV	XIAP
ZFP36L2	AIM2	RB1
DNAJB1	UCHL1	UVRAG
GPRIN3	STING1	MYD88
PTGER4	SERTAD1	NFKB1
ETS1	TRAF2	CHMP4B
LEPROTL1	MAPK14	TXN
RASGRP1	FAS	NFE2L2
CNOT6L	LINC03054	SLC25A37
IKZF3	CAMTA1-AS3	TLR4
SH2D1A	RAB35-AS1	TNFRSF1A
DUSP16	SLC39A13-AS1	PELI1
ITK	AIFM1	FLOT2
SARAF	KLHDC10	CFLAR
DGKA	SFTPA1	FKBP1A
RPS29	GSK3B	PDCD6IP
CLEC2D	TRADD	TNIP3
RGCC	MYC	ZBP1
AC005912.1	GJB1
PDE4D	DNM1L
FYN	MIR324
SLC38A1	SIRT2
BTG1	AREL1
EMB	IKBKB
LCK	DAPK1
SRSF7	CD274
AC099560.2	MIR425
CD69	EZH2
GZMA	CXCL5
SYNE2	MIR29B1
RPS3	BCL2
STK17B	MERTK
RPLP2	TYRO3
DUSP2	SIRT6
CD52	NAT2
FYB1	USP22
ARL4C	PANX1
RPS12	NAT1
LBH	IL37
IKZF1	DIABLO
RPL39P3	FASN
RPL13A	CDK9
RPL34	TIMM50
RPS21	PPP1R3G
RPL11	MIR7-1
RPS15A	AURKC
RPL36	NGFR
RUNX3	FMR1
RPS27A	HTRA2
RPL32	PRKAA2
RPS25	PRKAA1
PTPRC	PITPNA
TOMM7	ANGPT2
RPL13	METTL3
FCMR	TRAF5
RPL14	FNDC4
RPS18	FNDC5
RPS14	FASLG
RPL19	PRKN
RPL31	RALBP1
RPS6	TP53I3
RPL38	GSDMD
MBNL1
RPS20
AL590867.2
JUND
RPL35A
WIPF1
RPL39
RPL26P19
EIF4A2
RPL27A
HSPA8
RPS23
HSP90AA1
EEF1A1
RPS16
CALM1
RPL3P4
RPS19
RPL37
RPL10A
RPS4X
RPS17
RPS13
RPL5
NAP1L1
PABPC1
RPS8
RPS11
RPL23
RPS24
MT-ND5
MT-ND6
TMSB4X
HLA-A
MT-ND2
MT-CO1
MT-CYB
TPT1
B2M
RORA
MT-ND1
MT-ND4
RPL10
IL2RB
RPL4
RGS1
ITM2A
MT-ND4L
TOB1
RPL37A
RPL13AP5
PTMA
CDC42SE2
PIK3R1
RPL27
MT-CO3
TSC22D3
MT-ATP8
RPS28P7
MT-ATP6
LTB
RPS2
AC024293.1
IL2RG
ARAP2
NR4A2
RPL6P27
FAM46C
ARHGDIB
RAC2
ZNF331
YWHAZ
AC116533.1
RPL9P9
KIAA1551
CDKN1B
RPLP1
AC034236.1
ITGAL
RPL28
CD44
GPR183
MALAT1
RHOH
TSPYL2
RPL34P18
AP001324.1
LDHB
FAM107B
MT-ND3
TNFAIP8
RPS27AP16
PPP2R5C
PBXIP1
RPS3AP6
MLLT6
CD48
RPS5
EML4
NPM1
HECA
WNK1
ANP32B
PRKCH
RPL26
AHNAK
PIP4K2A
DDX5
KMT2A
RPS27
PAG1
CD4
RNF19A
ID2
RPL14P1
STK4
SRSF5
RPL30
AC099336.2
RACK1
RPL29
MT-CO2
GIMAP7
HNRNPDL
FNBP1
ATM
RPL8
SEPT6
SRSF2
SLFN5
SEPT9
CREM
RBL2
PRKACB
MBP
CCND2
SPN
CELF2
YPEL5
EZR
BRD2
ANKRD12
PRPF38B
RPS7
AL161909.1
ELF1
SF3B1
LPXN
IQGAP2
SLA
PTMAP2
AC136632.1
YWHAB
S100A4
PDCD4
RNF213
NACA
CCSER2
NKG7
EEF1A1P5
EIF1
PFN1
CST7
JUNB
DDX24
RPL12
TMEM123
AC004453.1
SOD1
DIAPH1
SRSF11
BTF3
RPL10AP6
RPL7A
COMMD6
RPL24
CCL4
LNPEP
RPS7P1
RPL15
RPS15AP24
GCC2
SON
CLDND1
RPL3
HNRNPH1
RPS3AP26
CLK1
CYTIP
TIPARP
ATF7IP
C9orf78
RSRP1
RPL6
KMT2E
HSP90AB1
NCL
PSIP1
CITED2
PFDN5
FAU
RPS15
RAD21
RBM39
PRRC2C
SF1
RPS6KA3
RPS23P8
SH3KBP1
KLF6
HMGB2
ARF6
CCNI
SFPQ
HINT1
UBA52
RPL22
SNHG5
MTATP6P1
ADD3
Z74021.1
NKTR
FXYD5
AL450405.1
HNRNPA2B1
RPSA
ARHGAP9
IDS
RPS28
UHMK1
RPL4P4
DOCK8
EEF2
G3BP2
ZC3HAV1
RPL18
MATR3
NPM1P27
RPL34P27
EEF1B2
SRRM1
VAMP2
AKAP13
RAB27A
VPS13C
ATP5E
PHF3
AL031727.1
SRSF3
AC073861.1
GOLGA4
ARID4B
TMX4
PIM1
ARL6IP5
TERF2IP
DDX17
BCLAF1
GSTK1
LDHA
PTP4A2
PNRC2
AL049873.1
WDR82
JAK1
HLA-F
ATPIF1
AC016739.1
APOBEC3C
BPTF
RPS11P5
ATP2B4
GLS
CAB39
MACF1
UCP2
RBM25
IER5
RPS3A
EIF4B
RBMX
ZC3H15
RASSF5
RPL12P4
UQCRB
TMSB4XP8
EIF3H
DEK
SEPT7
YME1L1
RPL23P8
ST13
LSM14A
TAF7
HP1BP3
IRF1
FXR1
HSPA9
NSA2
ZNF207
SERBP1
MGEA5
SMARCA2
RSL1D1
LUC7L3
ERP29
KIF5B
TAOK1
SET
EEF1B2P3
NSD3
FOXP1
STT3B
SYNCRIP
HNRNPC
DDX3X
SNRPD2
PTBP3
C6orf48
TPR
CSDE1
TTC3
POLR1D
IRF2BP2
NIPBL
RPS13P2
SMDT1
RPS9
ATRX
C11orf58
OIP5-AS1
C6orf62
H2AFV
RSRC2
KMT2C
HSPA1B
PEBP1
NR3C1
MBD2
PNN
GDI1
KPNB1
FO393411.1
EFCAB14
MAPK1IP1L
MAN1A2
HNRNPU
EP300
NASP
SLC38A2
EIF3E
PLP2
ROCK1
HNRNPL
ARID1A
AC010343.1
WAC
PRPF40A
COX7C
SLTM
YWHAQ
HNRNPUL1
EIF3K
FUS
RPL24P4
SRRM2
SKP1
RBMS1
UBE2D2
RAP1A
ATP5G2
SAP18
RBM3
PPP1R12A
SETX
HMGN1
PPP1CB
CD47
CMPK1
EWSR1
SCAF11
HSPH1
XRCC5
ATP1A1
AKAP9
UBC
TMEM50A
GOLGA7
RPL35
CBX3
PRF1
FGFBP2
KLRD1
CX3CR1
GZMB
FCGR3A
KLRF1
SPON2
GZMH
TRDC
CTSW
SH2D1B
S1PR5
PLAC8
TBX21
TRGC1
CD247
HOPX
PTPN4
KLRB1
PYHIN1
TGFBR3
ITGB2
EFHD2
MSN
TXNIP
HLA-B
FGR
APMAP
HLA-C
CD7
APOBEC3G
GNPTAB
SH2D2A
GBP5
BIN2
BHLHE40
CYFIP2
GNG2
SYNE1
CCND3
LCP1
TPST2
RASSF1
APOL6
SNORD3A
CFL1
TES
ACTR2
RAB29
SKAP1
RAP2B
SLAMF7
RNF125
BTN3A2
SSBP3
ARPC2
PARP8
SELPLG
SLC9A3R1
ARHGEF3
IQGAP1
TPM3
HLA-E
SORL1
CTSC
ARHGAP30
NFATC2
TYROBP
RIPOR2
UTRN
CD53
ITGA4
SAMD9
ZEB2
ACTR3
PTPN12
PTPN18
FCER1G
PLEKHA2
MAPK1
GIMAP4
PREX1
AKNA
PSME1
FOSL2
ERAP2
ACTG1
CAST
LBR
IFITM1
PRSS23
CD164
INPP5D
DHRS7
ARPC5
RAB8B
HNRNPA3
CCDC88C
ERBIN
KDM5A
MAT2B
CDC42
SP100
EIF4EBP2
PRKCB
DCAF7
ADAM10
DDX6
FAM49B
CD99
VAMP8
MTPN
STOM
PPP1R18
IER2
PDIA3
TAOK3
MYL12A
LRRFIP1
SAMHD1
CLEC2B
PPIAP22
TLN1
REL
HNRNPR
MOB1A
HNRNPK
SCP2
FGFR1OP2
ENSA
HNRNPD
PPP4R3B
PRPF4B
ITGB1
PPIA
HNRNPM
NUCKS1
ZC3H13
IFI16
HNRNPF
TGOLN2
B4GALT1
GNB1
COL3A1
COL1A2
COL1A1
LUM
DCN
SPARC
COL12A1
COL5A2
C1S
COL6A1
COL6A3
SFRP4
C1R
VCAN
IGFBP5
COL14A1
MMP2
CXCL12
ASPN
CALD1
COL5A1
POSTN
COL11A1
CTSK
PRRX1
MXRA5
TIMP2
FN1
THBS2
IGFBP4
OGN
FSTL1
CXCL14
FBLN1
COL6A2
FMOD
PCOLCE
BGN
WNT5A
OLFML2B
FBN1
OMD
EGFL6
CXCL13
SERPING1
HTRA1
AEBP1
ANTXR1
SFRP2
SERPINF1
NOTCH3
CRISPLD2
CCDC80
CYR61
NID1
PALLD
THY1
SERPINH1
APCDD1
SDC2
LAMA4
PLPP3
SOD3
PRELP
CDH11
GAS1
CFH
DDR2
LGALS3BP
ADAMTS2
CTHRC1
MYLK
OLFML3
NR2F2
MXRA8
PDGFRA
TIMP3
FILIP1L
PTN
FRZB
COL4A1
ISLR
DIO2
MDK
CTGF
MYL9
CALU
MGP
SPATS2L
LAMC1
ADAM12
CYBRD1
APOD
C3
LOXL2
EDIL3
ENAH
FBLN2
LAPTM4A
EGR1
COL4A2
MMP14
LHFPL6
SCARA5
GPNMB
CPE
MSX1
CNN3
LGALS1
UACA
MAP1B
ITGB5
PMEPA1
PTGFR
LRP1
EFEMP1
SH3PXD2A
RCN1
NBL1
LAMB1
CREB3L1
LTBP1
MYO1B
HMCN1
LEPR
PDGFRB
CPXM1
FKBP10
LRRC15
LOX
GPM6B
SEMA5A
AKAP12
CRABP2
EDNRA
ENPEP
DST
ECM2
CD63
CAVIN1
SMOC2
TPM1
PLOD2
EPB41L2
KANK2
LTBP2
RAB31
GSN
IGFBP7
MFAP4
MAP3K20
CHN1
PXDN
APP
FGFR1
CLEC11A
CYP1B1
NDN
C1QTNF1
PMP22
GPX8
FKBP9
GUCY1A3
PDGFRL
ID4
LAMB2
INHBA
COL5A3
CD248
TMEM119
SPON1
SCARB2
EBF1
GLT8D2
SEPT11
EPAS1
TNS1
CPXM2
NFIX
TFPI
DKK3
VSTM4
FHL1
TMEM176A
KDELR2
NREP
THSD4
SYNPO2
FRMD6
RHOBTB3
ANXA5
GREM1
DPYSL3
ANGPTL2
PLEKHA5
CRTAP
TPM2
EHD2
SFRP1
RBFOX2
NNMT
PTGDS
PCDH18
SGCE
EMP1
CLMP
PLS3
FBLN5
MAGED1
GJC1
PRKG1
GNG12
EPS8
OLFML2A
SEC31A
TMEM98
STEAP1
SSPN
RARRES2
PPIC
LEPROT
TEAD1
COL27A1
FGF7
RCN3
ITGAV
GUCY1B3
MARCKS
KIRREL1
SMARCA1
SNAI2
SLC44A1
H1F0
TCEAL9
TMEM176B
MOXD1
PAM
NFIC
GOLIM4
DPT
AHR
FOXF2
MFGE8
SGCB
PGRMC1
DSTN
LSAMP
MRC2
BEX3
TWSG1
RRBP1
TGFB3
PARVA
FLRT2
CERCAM
BICC1
KIAA1217
ANXA2
CTSO
TNFRSF21
TWIST1
SULF2
FAM114A1
CKAP4
C11orf96
PAPSS2
OSMR
CCL2
PLXDC1
KITLG
PRSS12
FAT1
PLXDC2
SULF1
ANGPT1
COPZ2
CAMK2N1
FKBP7
ASPH
GJA1
FOXF1
PSD3
EPHA3
SOX4
RTL8C
SLC39A14
FZD1
TCF4
HCFC1R1
OLFML1
KLF9
EPDR1
FKBP14
LPAR1
MARVELD1
VCL
PCSK5
KDELC2
WNT2
PTGFRN
EFEMP2
IL1R1
THBS1
NLGN2
FERMT2
TBX3
PLOD1
RORB
ZNF503
OAF
ZCCHC24
TMEM47
GXYLT2
SLC7A2
SH3PXD2B
IGDCC4
EGFR
COLEC12
TMEM45A
SLIT3
LOXL1
LIMA1
PHLDB2
BMP1
NFATC4
MYOF
PDGFD
FBLIM1
ROBO1
FHL2
MAP4
PDPN
CYGB
COL8A1
CD59
GGT5
VGLL3
OAT
MRVI1
SLC40A1
CTDSPL
C1QTNF6
SVEP1
STARD13
FNDC1
DPYSL2
COL16A1
PEAK1
KREMEN1
TPBG
TWIST2
GLI3
TSPAN11
ADAM9
MSRB3
RND3
PRSS35
DAB2
LGALS3
YAP1
RARG
GNAI1
SATB2
P4HA1
HTRA3
TRPS1
CD276
ZBTB20
MYH10
SEPT8
NEGR1
VCAM1
ADAM33
MPZL1
RHOQ
TSC22D1
TGFBI
TPST1
SLC2A10
FAM20C
NRP2
SYDE1
TFAP2C
CDC42BPA
SRPX
MAP1A
GPR176
SEC24D
ECM1
CDKN1C
TCEAL4
IFITM3
PCYOX1
TSKU
VASN
MID1
SH3D19
MAGI2-AS3
RCAN2
HNMT
PFN2
ACKR3
MAGED2
SIX1
MMP19
FAM20A
IGF2
SLC39A6
GALNT5
ADGRL2
C2
DSEL
SNX9
AMOTL2
MXRA7
IL11RA
RAI14
NCKAP1
COL8A2
SEC23A
CTTN
KDELR3
GOLM1
DZIP1
GEM
CPQ
PBX1
UNC5B
MCC
SAMD5
ITPRIPL2
KIF26B
HGSNAT
APBB2
SNCAIP
MME
RUNX1T1
PLSCR4
FZD3
ABL1
FAM46A
PAWR
CHST14
TRAM2
SPIN1
ITGA11
OSBPL1A
PID1
GPX7
SDC3
GINM1
PKD2
PLTP
OLFM2
EXT1
CRISPLD1
WWTR1
PTK7
BACE1
C5orf15
KIFAP3
CTSL
ITSN1
PDZRN3
CAMSAP2
EXTL2
TNKS1BP1
A4GALT
WLS
SLC1A3
SGMS2
CDC42EP1
TCF7L1
P3H4
TRIM2
IRS1
ALDH1L2
PTPRK
FAT4
TUSC3
TMEM263
DOCK1
AFAP1
FEZ1
DPY19L3
JAM3
H6PD
RUNX2
TNFAIP6
GSTA4
LHFPL2
TRIP6
NEO1
RGL1
SETBP1
C1orf198
P3H1
ACVR1
TULP3
DPY19L4
CDC14B
MAN1C1
CDK14
TSPAN3
SAV1
ROCK2
PLBD2
AIG1
TCF12
SASH1
RNF144A
MYO1C
VIM
HDLBP
IL6ST
ZNF532
CAV1
KCTD10
ACO1
BPGM
ARF4
SLC39A1
TMTC3
LPP
PTPN13
PTPRG
NOTCH2
WASL
FNDC3B
ARHGAP1
TCF7L2
SETD7
MAFB
DLC1
JAG1
CDC42EP4
EID1
KDELR1
SMAD5
EXT2
DTX3
CD109
SPART
NORAD
RBPMS
NFE2L1
PXDC1
TMED3
CYB5R3
CLTC
MGST3
OSTC
NPTN
CLIC4
ITGA1
GOLGA2
SPRED1
PDE4DIP
ARHGEF12
TIMP1
SORBS3
CTNNB1
ABI2
ARHGAP21
MAGEH1
ALPL
GNB4
RRAGA
RAB13
CSGALNACT1
CEBPD
TCEAL8
GLT8D1
ARMCX3
SEPT2
EEA1
CD9
CST3
ARL1
CTNNA1
CREG1
TUBB
CBX6
IMPAD1
RHOB
IL13RA1
LTBR
SESTD1
NRP1
GALNT1
MT2A
TUBA1A
CCND1
SPAG9
EI24
RAB2A
CSF1
GLG1
LTBP3
CTNND1
PIGT
EMP2
LAPTM4B
TCEAL3
VKORC1
TRIM8
CD81
ZDHHC9
HACD3
REEP3
TMEM43
SURF4
TMEM167A
SERINC5
LATS2
MIB1
DYNC1I2
ZBED1
KCTD12
CASC4
PTK2
AHCYL1
HEBP1
AK3
PRNP
LGMN
AC034102.1
FAM126A
ATP6AP2
RTL8A
RNF24
CBX1
MAGEF1
GPR107
ADH5
ARL3
NME4
LMAN1
JDP2
MYO6
YBX3
PRRC1
COPB2
RYK
ICMT
ANTXR2
LAMP1
LANCL1
IKBIP
SAR1A
SELENOM
PHLDA1
FAM198B
ARHGEF40
ADI1
COPA
DVL3
SPTSSA
MRFAP1
PDLIM5
SCPEP1
REV3L
SUMF1
TMCO3
ZHX1
ENTPD1
PPFIBP1
TXNDC15
SPPL2A
PSAP
PEA15
STAT2
ANO6
PDXDC1
YIPF5
LNPK
C5orf24
PPP2CB
SVIL
MBTPS1
F2R
PSMB5
CAMK2D
SESN3
LMNA
DAP
AP3S1
PTTG1IP
ZMAT3
TTC3P1
QSOX1
NFIA
ATL3
PTMS
FTO
CBX5
BNIP3L
PRDX4
CNP
ATN1
DBN1
HDGFL3
GORASP2
COPS7A
KDM5B
HEXA
C1orf54
NF1
MAP4K5
RCN2
GOLGA3
RSU1
MAN1A1
PDLIM1
APPL2
PLAU
HOOK3
PTEN
CYB5A
TTYH3
KIAA0930
GFPT1
IFT57
RAP2A
FSCN1
ACTN1
CYB561
CLU
CTDSP2
ZKSCAN1
RDX
HSBP1
TFG
KIDINS220
ATP2A2
TMEM248
ADD1
UBE2E3
TMED2
HEXB
AP2M1
STT3A
RTN4
DYNC1H1
SPTBN1
COPG1
SEC63
LRRC58
RDH11
DYNC1LI2
TMED9
DESI2
TPM4
TMEM106B
OAZ2
MORF4L1
MORF4L2
REXO2
DDX1
TJP1
CAPRIN1
TMEM59
CMTM3
C6orf89
PAPSS1
DCTD
ESD
TMEM165
DYNLT3
SAMD4B
FAM210B
TM9SF3
ATRAID
GANAB
SEC13
USP11
APLP2
CHST15
DDB1
TMED7
S100A6
IFNGR2
RAB1A
MCFD2
ITFG1
RARS2
CLSTN3
RABGAP1
MLEC
ERLEC1
CLSTN1
PRDX3
MTCH1
SH3GL1
DUT
TMEM214
COMT
TMEM30A
FCGRT
PLD3
G6PC3
VKORC1L1
RUSC1
ZEB1
CHMP3
MORF4L1P1
TMEM14C
BORCS7
METTL7A
UBE2E1
DSTYK
FGD5-AS1
EIF2AK4
IFNGR1
UGCG
NFIB
TMEM184B
GSTP1
ERC1
PIGK
COLGALT1
PRKAR1A
PRDX6
ID3
MAP4K4
YIPF3
CD151
RFTN1
TMCO1
SDC1
SPPL3
FAF2
ARHGEF7
PGRMC2
RAC1
RARS
NCOA7
CYFIP1
NCOR2
FOS
SUMO3
SEM1
TM9SF4
KRT10
ATXN10
TM9SF2
MBNL2
RAB5B
CUX1
BCAP29
NUCB1
MIR4435-2HG
TMX3
DNAJC15
UQCRQ
GLUD1
SERF2
REEP5
CSNK1E
DYNLL1
ZMPSTE24
CAMTA1
MRPL3
DDAH2
SERPINB6
MPRIP
FEZ2
TPI1
PSMD2
NCK2
MYL6
CALM2
SPARCL1
CSRP1
MYH9
GPX4
ZFP36L1
COX6C
A2M
SOCS3
ZMIZ1
MEF2C
TPSB2
CPA3
TPSAB1
MS4A2
CTSG
HPGD
ADCYAP1
KIT
VWA5A
GATA2
LMO4
HDC
IL1RL1
GCSAML
HPGDS
CMA1
SIGLEC17P
MAOB
ACSL4
C1orf186
SLC45A3
CAPG
CAVIN2
AL157895.1
PTGS1
RGS13
ARHGEF6
BTK
RAB27B
LIF
CALB2
SLC18A2
ALDH1A1
CNRIP1
TPSD1
GRAP2
STX3
TESPA1
MITF
HS3ST1
MLPH
CLNK
SIGLEC8
ATP6V0A2
ITGA2B
HS6ST1
EPB41L1
CDK15
BACE2
FCER1A
ALOX5
SMYD3
KCNH2
P2RX1
CD22
ALS2
LINC01835
AKAP5
MYB
ENPP3
NTM
TAL1
PAQR5
SVOPL
AC020571.1
MEIS2
PGBD5
GMPR
RASGRP4
CD84
CD82
CTSD
CD33
LPCAT2
LEO1
PLIN2
FER
ARHGAP18
SYTL2
CTNNBL1
BMP2K
ACOT7
RAB37
VAT1
DUSP6
NSMCE1
GALC
KIAA1522
NDFIP2
ADRB2
LAT2
GM2A
FAM129B
ANXA1
STXBP5
SAMSN1
GALNT6
DUSP10
P2RY14
CLCN3
SLC2A6
FOSB
HAVCR2
SPECC1
HK2
EMILIN2
CSF2RB
TMEM154
PLAT
TNIK
BEX4
ASAH1
SOX13
SGK1
LAX1
SLC11A2
ACVR1B
OSBPL8
TRIM24
TNFSF10
LAIR1
MAST4
VEGFA
IL18R1
SLC43A3
ACER3
PAK1
TIAM1
CD83
SWAP70
STMN1
SLC26A2
ABCC1
RGS10
NCOA4
NMT2
RPS6KA5
GLUL
ZNRF1
AGPS
KLRG1
NFKBIZ
RAPGEF2
SRGN
RNF130
RAB32
ITGAM
DPY19L1
MPP1
ALOX5AP
PEPD
ITM2C
CREB3L2
IRS2
DENND1B
MLLT1
ADGRE2
BST2
SMARCAD1
MSRA
GAS7
FAM110A
RHBDD2
GADD45B
SMIM3
ABHD2
C10orf128
MAPK6
HLTF
SOGA1
CANX
ADPRH
SNX5
C21orf91
C1orf162
PRKX
SPINT2
GBE1
ESYT1
CCDC88A
ZFP36
CXCL16
PARVB
RGS2
B4GALT5
SLC2A3
PTPN6
LAPTM5
PTGS2
PLXNC1
HSD17B4
PPP1R15A
PTAFR
HS2ST1
CTR9
GATAD1
ANXA4
FMNL3
EGR3
MYADM
CPPED1
ANXA11
ATP2A3
TSNAX
CRBN
PARP4
ATP6V1F
CHST2
RASGEF1B
ELL2
CKAP5
ARHGAP25
GSE1
RALB
GNAQ
STMP1
GPR65
PCMT1
SERPINB1
TPP1
CPT1A
RHOG
CNIH1
VPS41
HSP90B1
SDCBP
DBI
NR4A3
SEC11A
TBC1D9B
YBX1
AREG
HIPK2
PRDX1
H3F3B
METRNL
BICD2
CLIC1
OSBP
TACC1
ATXN1
TMOD3
DUSP1
YWHAE
GPX1
RNF187
MAP3K1
SYK
BABAM2
VEGFB
GRK2
KLF10
FAR1
CD37
ACBD3
AFF1
BANF1
MAPRE1
RAB7A
CHST11
M6PR
EMP3
ATP6AP1
SYNGR2
PHF20
CBFB
SH2B3
HSPA1A
ACTN4
NCF4
RTN3
SERINC3
SH3BGRL
ZFP91
SELENOK
PPDPF
DOCK11
KCTD20
SH3BGRL3
PPP1R15B
HIPK1
PPP3R1
CCNG2
DNAJC3
PSMD1
SYAP1
GRB2
MAGT1
SCAMP2
GNS
FTLP3
ATP5C1
VDAC1
SYPL1
DYNLL2
HPCAL1
DRAP1
CAPN1
AP1S2
VHL
VAPA
CKS2
NPC2
AKR1A1
YBX1P1
RBM8A
MIER1
SPCS3
TIPRL
FOXN3
SND1
TOMM20
BLOC1S6
TMEM87A
TMBIM1
ARL8B
RPL36AL
CAMLG
RYBP
MKRN1
SKI
ETNK1
PTMAP5
MTDH
RAD23B
SH3GLB1
DAD1
OAZ1
CFAP97
TOP2B
AC114491.1
PURA
PKM
TMED10
MANF
ATP5B
CDK2AP2
ABRACL
KHSRP
QKI
COL4A3BP
ANXA7
BNIP2
COX8A
USP48
ACADVL
BRK1
ARL5B
PCM1
LMAN2
BAZ2B
WIPF2
DNAJB9
PPP1R10
ATP6V1E1
PPP1CC
NDUFB2
SKIL
ATP5F1
ARF1
RPL7L1
TCEA1
RTFDC1
CCT8
OXA1L
CHD4
EIF5
HSPA4
SRI
NDUFA5
SUMO2
CALR
SLC1A5
HLA-DRA
EREG
HLA-DPA1
HLA-DRB1
CD74
MS4A6A
HLA-DPB1
CYBB
HLA-DQA1
IRF8
CPVL
CXCL2
CCL3L3
CXCL3
LYZ
MPEG1
OLR1
KLF4
MS4A7
HLA-DQB1
FCN1
HLA-DMB
AIF1
HLA-DRB6
FGL2
HLA-DRB5
HLA-DQA2
HLA-DMA
ATF3
ALDH2
CD86
FPR3
CSF1R
F13A1
NLRP3
HBEGF
CTSS
SERPINB9
GRN
CTSZ
RNASE6
CDKN1A
MRC1
FTL
SHTN1
IL1B
CD36
INSIG1
CD300E
CD163
CTSH
ETV3
MFSD1
LILRB4
H2AFY
CLEC10A
THBD
PPT1
CHMP1B
FCGR2B
CD14
LILRB1
2024-03-01
SPIB
LILRB2
DSE
MS4A4A
HLA-DOA
NAPSB
ADA2
IGSF6
LGALS9
TFEC
GDI2
HMOX1
THEMIS2
ZNF385A
FGD2
ALCAM
THAP2
RTN1
PTPRE
LGALS2
RASSF4
KYNU
LAP3
SLAMF8
SKAP2
CORO1C
IL18
EPB41L3
STX11
FAM49A
GAPT
GGTA1P
OGFRL1
CLEC7A
LST1
CBFA2T3
LY86
CSF2RA
CAT
SLC8A1
CPM
GLIPR1
MAP3K8
PIK3AP1
CYP2S1
SIRPA
RIPK2
SLC7A7
GRK3
AOAH
SIGLEC10
HCK
PLSCR1
SEMA4A
GRASP
JAML
TSPAN33
VASH1
SPI1
ETV6
RGS18
DUSP3
NAGA
GNA15
NAAA
PLXNB2
NCKAP1L
[truncated: 1,656 more rows]

## Sheet: Table S5
Table S5. Intersection of differentially expressed genes in the high necroptosis score group and differentially expressed genes in the GSE10334 dataset.
High-NRGs	DEGs	High-NRGs|DEGs
NFKBIA	CTSH	C5AR1
TNFAIP3	COL15A1	BCL2A1
SOD2	IGLL3P	IL1B
NAMPT	CXCL12	G0S2
NFKBIZ	CHST15	CSF3R
PLAUR	C3	CSF2RB
NAMPTP1	IGLJ3	TRIB1
NFE2L2	IL10RA	RGS2
SLC25A37	AC128677.4	CTSS
CXCL8	APLNR	FOS
S100A8	ICAM2	BTG2
FPR1	ATP6V1C2	PDE4B
MXD1	CHST2	SELL
MNDA	GUSBP11	EGR1
FCER1G	SELP	SOCS3
PPP1R15A	CD27	CXCR4
PTGS2	PLAT	HCLS1
GLUL	ANKRD6	PECAM1
SAT1	CXCL1	LAPTM5
TYROBP	RUNX1-IT1	CD53
SERPINA1	ENTPD1	GPSM3
S100A9	MZB1	GMFG
IL1RN	IGLL5	FAM46C
GCA	COL4A1	EVI2B
RPS29	IGKV1-17	SLAMF7
FTH1P20	IGKV1-37	ARHGAP9
RPL34	RORA	ITM2C
RPS6	NDUFB7	SSR4
RPS20	CLDN20	UCP2
PPIF	CECR1
SRGN	SEL1L3
CEBPB	ST6GAL1
PLEK	ANXA6
FTH1P11	CYTH1
RPS8	XBP1
RPS27A	BIN2
RPL31	IGKV1OR2-108
S100A11	FKBP11
BASP1	ELMO1
RPS12	ADAM28
CFLAR	IGLV1-44
LYN	SPAG4
DUSP1	STX19
IFITM3	COBL
RPL37	EEA1
FTH1P8	FAM57A
KDM6B	VOPP1
RPS3	THEMIS2
MCL1	AKR1B1
BCL3	CASP10
RPL27A	abParts
IFITM2	AHNAK2
LITAF	IGK
RPL32	RARRES2
RPL11	IL2RG
RPLP2	CDK14
SDCBP	RGS4
H3F3B	VWF
RPL35A	CD19
RNF149	NEFM
RPS11	CPNE5
MARCKS	COL4A2
ETS2	CD79A
RPL39P3	SPAG17
RPS15A	ACKR1
CD55	BHLHE41
EEF1A1	KIAA0125
RPS18	IRF4
PLSCR1	SASH3
RPS21	CYTIP
RPL23	OSBPL6
RPS13	MME
RPS16	TNFRSF17
RPL19	MIR143HG
SERPINB1	CSF3
FTH1	CD48
RPL38	CYP24A1
IVNS1ABP	LY96
VASP	BDNF
FOSB	HCK
FTL	CYBA
PFKFB3	LOC100293211
RPS14	PIM2
ARL5B	EPB41L4B
CSRNP1	C3orf14
VMP1	FAM83C
RPL5	CWH43
ARRB2	EGFL6
RPS23	ERLEC1
NABP1	PRDX4
RPL26P19	NEDD9
RPS17	PXDN
RPS24	TBC1D9
RPL37A	CD38
RPS19	RAC2
RPS4X	IFNAR2
RPL14	STXBP5
RPL13	LOC101930405
RPL4	ANKRD29
RPL10A	HSD11B1
RPL36	TMEM176B
RPL6P27	ESYT3
NEAT1	POU2F3
TRBC2	SLC16A9
RTN3	IFI30
FAM129A	P2RY8
RPL3P4	IGHM
RPS5	NCKAP1L
MT-CYB	HMGCR
MT-RNR2	ITGAL
TRAC	RCSD1
ITM2B	LPXN
SAMSN1	AGT
FKBP1A	IGHA1
RPL27	LAX1
RPS28P7	FCGR2B
NUMB	LOC101929272
AC024293.1	MERTK
NAP1L1	NCF4
AL590867.2	GYPC
MT-ND4	RNASE6
RPL13A	MMP7
RPS25	CXCL6
RPL10	SELM
TAGLN2	ACTA2
MT-ND2	PPM1L
PTPRE	LOC100507472
AC005912.1	TGM2
ZFP36	ZNF57
PNRC1	BLOC1S5-TXNDC5
PPP1R15B	TMEM176A
RPLP1	PTP4A3
AC099560.2	IGHV3-54
CHMP4B	ICAM3
CARD16	TXNDC11
MT-ATP6	AADAC
SEC14L1	FCN1
AC116533.1	KLF2
RPL8	SLC7A7
RPL39	IGLC1
ETS1	MYO6
TOMM7	ANKRD35
CASP4	SLC27A6
JUN	C16orf54
EFHD2	GSTA4
RACK1	PLXDC2
MT-ND5	DR1
RPS2	ISL1
LCP2	SLC19A2
RPL13AP5	TP53AIP1
PTMA	LOC100131043
TPM4	NGEF
HSPA5	CORO1A
RPL29	ZNF275
R3HDM4	BMP6
BIRC3	P2RX5
MT-ATP8	DDIT4L
ZYX	SLC15A2
MT-ND4L	RHOH
FTLP3	AADACL2
ACTB	EPCAM
CTSB	EXPH5
RPL26	HRASLS
RPL15	PNOC
NACA	HS3ST6
RAB31	FCRLA
FOSL2	ANKRD36BP2
ZFP36L1	NPR3
SLC2A3	BPIFC
LCP1	TXNDC15
PICALM	ZNF823
PIM3	STK39
RPL9P9	SERPINI1
JMJD1C	CDK5R1
NCOA4	FCGR3B
MT-RNR1	GNG7
PSAP	SOX21-AS1
RPL34P18	NEBL
RPS3AP6	RP11-255C15.4
AC034236.1	OCLN
ALOX5AP	CLIP1
TXN	MEI1
CD3E	SAA1
RPL7A	PIP5K1B
AP001324.1	TP53INP1
RPS7	TAGLN
IL32	VNN2
BRD4	NHSL1
IER2	ANK3
FAM49B	ELOVL4
SYAP1	KCNN3
ETF1	RP11-38P22.2
TKT	GLDC
ASAH1	ENPP2
CCNL1	NSG1
CD2	CBR3
SKIL	OLFML2B
AC136632.1	MIR6751
ADAR	SEL1L
ATP6V0D1	IGLV6-57
IQGAP1	DSC1
NPM1	KRT80
SPOCK2	CYP4F22
CMTM6	GLYR1
RPL28	DSC2
S100A6	DUSP5
CALM1	FAIM3
RPS7P1	PPAPDC1B
UBE2R2	TAPBPL
BRI3	TOM1L1
WAS	CARD8
MYADM	SELE
RPL12	CYP27C1
RPL10AP6	PDZRN4
ZFP36L2	FOXN1
RPS27AP16	DERL3
RNASET2	TDO2
ANP32B	ESF1
RPL6	CAPNS2
JUNB	SEC11C
PABPC1	SFMBT2
RPS15	LRMP
EIF4A2	HSH2D
SLC38A1	RNASE1
UBE2D3	ANPEP
PTMAP2	RGS1
AL161909.1	CCDC69
STAT3	RASSF6
LBH	CPEB2
BTF3	CCNT2
LAMP2	HSPA4L
ANP32A	A2ML1
EEF1B2	CD14
GRN	E2F8
CCL5	ARRDC4
APLP2	PLAC8
RPL14P1	ABCA12
EEF2	ODAM
BHLHE40	SLC12A8
TNFRSF1B	ZNF273
IKZF3	ACPP
RHOG	WASL
PTEN	C12orf29
CHD1	ABHD5
RPL24	SFRP4
EEF1A1P5	DLX2
RAB1A	KRT19
PDCD6IP	CD180
HSPA8	TOP1
ARL4C	MUC15
RPL18	IGHV3-73
RPS23P8	SOCS6
IFNGR1	LOC101928789
RPL22	CXCL13
CD52	CYR61
HIF1A	BC069776
NOP10	FCRLB
LRP10	TRBC1
RPS3AP26	CCL18
CD46	PDGFD
LDHB	EML1
RPL3	DSG1
GNAI3	CD37
GADD45B	WFDC5
CDKN1A	LRIG3
MIDN	CYAT1
AL450405.1	ENDOU
IFNAR1	USP27X-AS1
RPL30	C1QA
QKI	IGF2
PFDN5	HLF
ARPC5	FABP4
RPS11P5	CDCA7
PTGES3	IGJ
DNAJA1	FUT8
MTATP6P1	DENND4B
CNOT6L	RDH13
DDX3X	GAREM
Z74021.1	CTGF
RPL4P4	LINC00888
RPS15AP24	BBOX1
AC004453.1	RP11-138A9.1
CYLD	PIR
GRB2	IGLV4-60
CD63	MMP12
CD99	HSPA13
RAB7A	DNAJB9
RPS27	MGP
UBA52	MMP9
MALAT1	LOC100506098
PTTG1IP	CYP3A5
COTL1	VCAN
RPLP0	TRIM13
CST3	XK
HINT1	LOC101928916
HLA-C	PANK1
HMGB1	BAMBI
SEPT6	TPPP3
YPEL3	RALBP1
ACTR3	DAPL1
IER5	HPGD
PPP1R18	TPR
ARPC3	IGHG1
EIF4B	SDF2L1
SYNE2	IL24
DNTTIP2	ISG20
CDC42	AMPD1
MAF	CLCA4
AC010343.1	FLG2
KLF6	CALML5
BAZ1A	MAMDC2
AC099336.2	MYL9
NPC2	LOC344887
SMCHD1	DNER
AC016739.1	IGFBP4
ITM2A	ARG1
COMMD6	MFSD6
TAGAP	PROK2
GNAI2	CHRNA9
HLA-E	DNAJA4
CLIC1	FAM20A
ATM	GBP6
NCL	GPR160
RPS28	CEACAM1
DDX21	YOD1
SERPINB9	PGAP1
UBE2B	AL928768.3
FYB1	GZMB
RPL34P27	VAV3
TUBA1A	GRAMD1C
IFI6	SLC47A2
PREX1	FNDC1
ATP5G2	CHL1
TERF2IP	ENPEP
SARAF	CCL19
LEPROTL1	MPPED2
PIK3R1	LCE2B
VAPA	ALOX12B
RPL12P4	SDR9C7
SH3GLB1	LY6G6C
FYN	SCIN
DAZAP2	CD177
OSBPL8	PPBP
RBPJ	LCE1B
SNRPD2	CXCL14
HNRNPDL	ALOX15B
FAU	ADH7
KMT2A	CFI
SNORD3A	HBA1
AC073861.1	FAM76B
AL031727.1	FCGR3A
SOD1	MMP13
BOD1L1	KRT10
PPDPF	LAMB4
RPL35	CLPTM1L
FAM107B	TNFAIP6
MORF4L2	HBG1
PGK1	MS4A1
VIM	AKR1C1
RPSA	LINC00525
CCND2	FLG
ATP2B1	CD69
SLA	CDSN
WSB1	KRT2
APBB1IP	DCT
RTN4	RPTN
CAPZA1	IL6
SRSF7	C4orf26
CDKN1B	LOR
LGALS3	KRT76
RPS3A	ASPRV1
RPS13P2	RARA
SMAP2	HAL
IL7R	KRT3
RPL23P8	KRT1
PPP2R5C	MMP3
SLC25A6	DAAM1
AL049873.1	MMP1
WTAP	TYRP1
EMB
PRR13
PAK2
ZFAND5
PRPF38B
CIRBP
PEBP1
SET
PPIA
SLFN5
VAMP2
TAPBP
LRRFIP1
PSIP1
NSA2
MAPRE1
RBMX
LSP1
SEPT9
EEF1B2P6
ADD3
NPM1P27
TXNIP
SON
SRSF11
TMSB10
MBNL1
DDX24
PNRC2
RUNX3
TPSB2
PNN
EEF1B2P3
EIF3H
NUCKS1
UQCRB
LUC7L3
COX7C
SNHG5
TRAM1
RPL10P9
RIPOR2
IKZF1
C9orf78
SMDT1
RHOB
MLLT6
RASSF5
CDC42SE2
C6orf48
ARF6
COX6C
RPL24P4
MATR3
RPL37P2
EIF3E
RGCC
SEPT7
MAP1LC3B
MSL1
ATP5L
LNPEP
IRF1
SHISA5
RYBP
OIP5-AS1
CD44
AC074033.1
ERP29
SRRM1
EZR
FO393411.1
RAN
HMGN1
UHMK1
ATF7IP
STAT5B
ATP1B3
PEA15
GCC2
RSL1D1
PIP4K2A
RPL5P34
HNRNPH1
NDUFS5
HP1BP3
WDR82
RPL7AP6
BRD2
PPIAP22
TTC3
SMARCA2
G3BP2
TNFAIP8
MTDH
OST4
LMNA
MPHOSPH8
CSTB
COL1A2
MACF1
BPTF
RPL36AL
COX4I1
ATRX
KTN1
TOB1
IGKC
RAD21
COL1A1
PPP1CC
ZC3HAV1
HNRNPD
ZBTB38

## Sheet: Table S6
Table S6. Intersection of genes selected by LASSO, SVM-RFE, and RF algorithms.
LASSO	RF	LASSO|RF	SVM-RFE|RF	LASSO|SVM-RFE|RF
PECAM1	LAPTM5	IL1B	CD53	CSF3R
GMFG	ITM2C	G0S2		CSF2RB
EVI2B		FOS		BTG2
		EGR1		CXCR4
		SOCS3		GPSM3
		FAM46C		SSR4
